# Supplementary material
Source: PubMed Central journal article supplement (PMC2896295)

6.823  
6.814  
6.791  
6.782

6.146  
6.143  
6.114  
6.112

5.050  
5.047  
5.041  
5.039

4.226  
4.212  
4.197  
4.183  
4.177

3.663  
3.658  
3.649  
3.644  
3.635  
3.630  
3.616

3.553  
3.539  
3.534  
3.525  
3.520  
3.511  
3.506  
3.492

1.303  
1.289  
1.275  
1.235  
1.221  
1.206

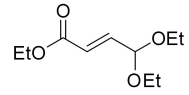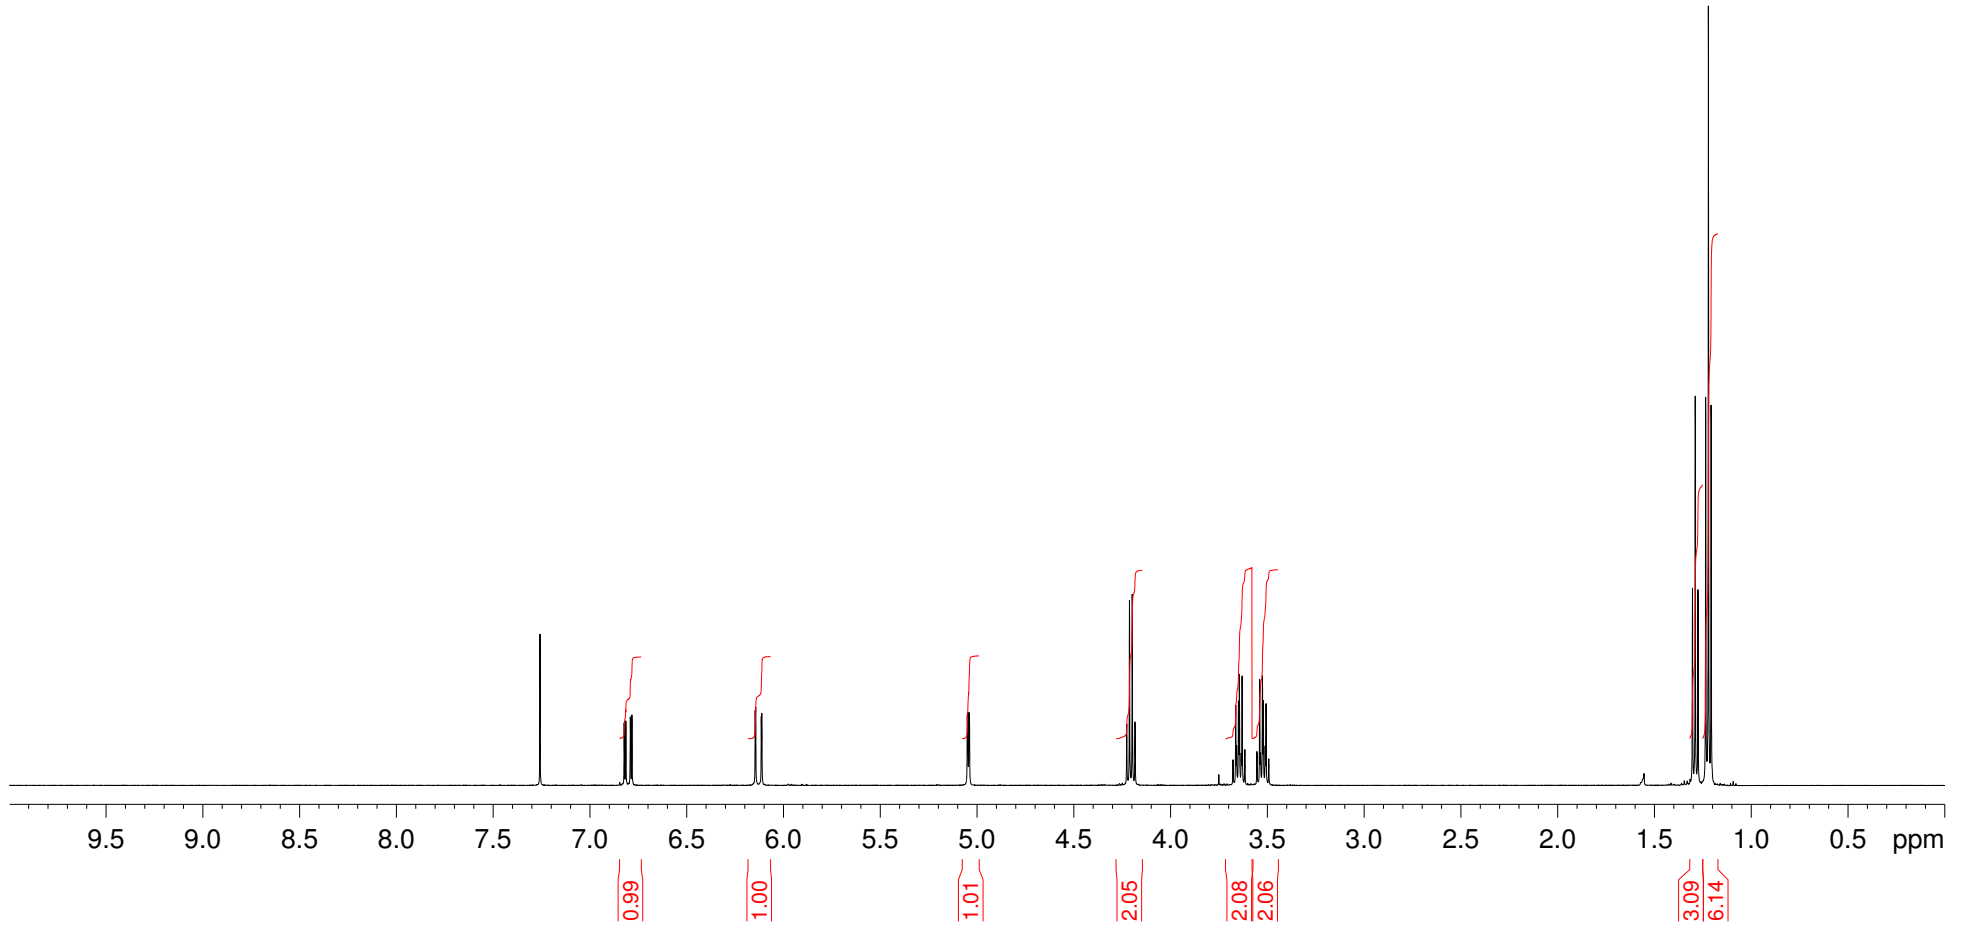

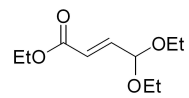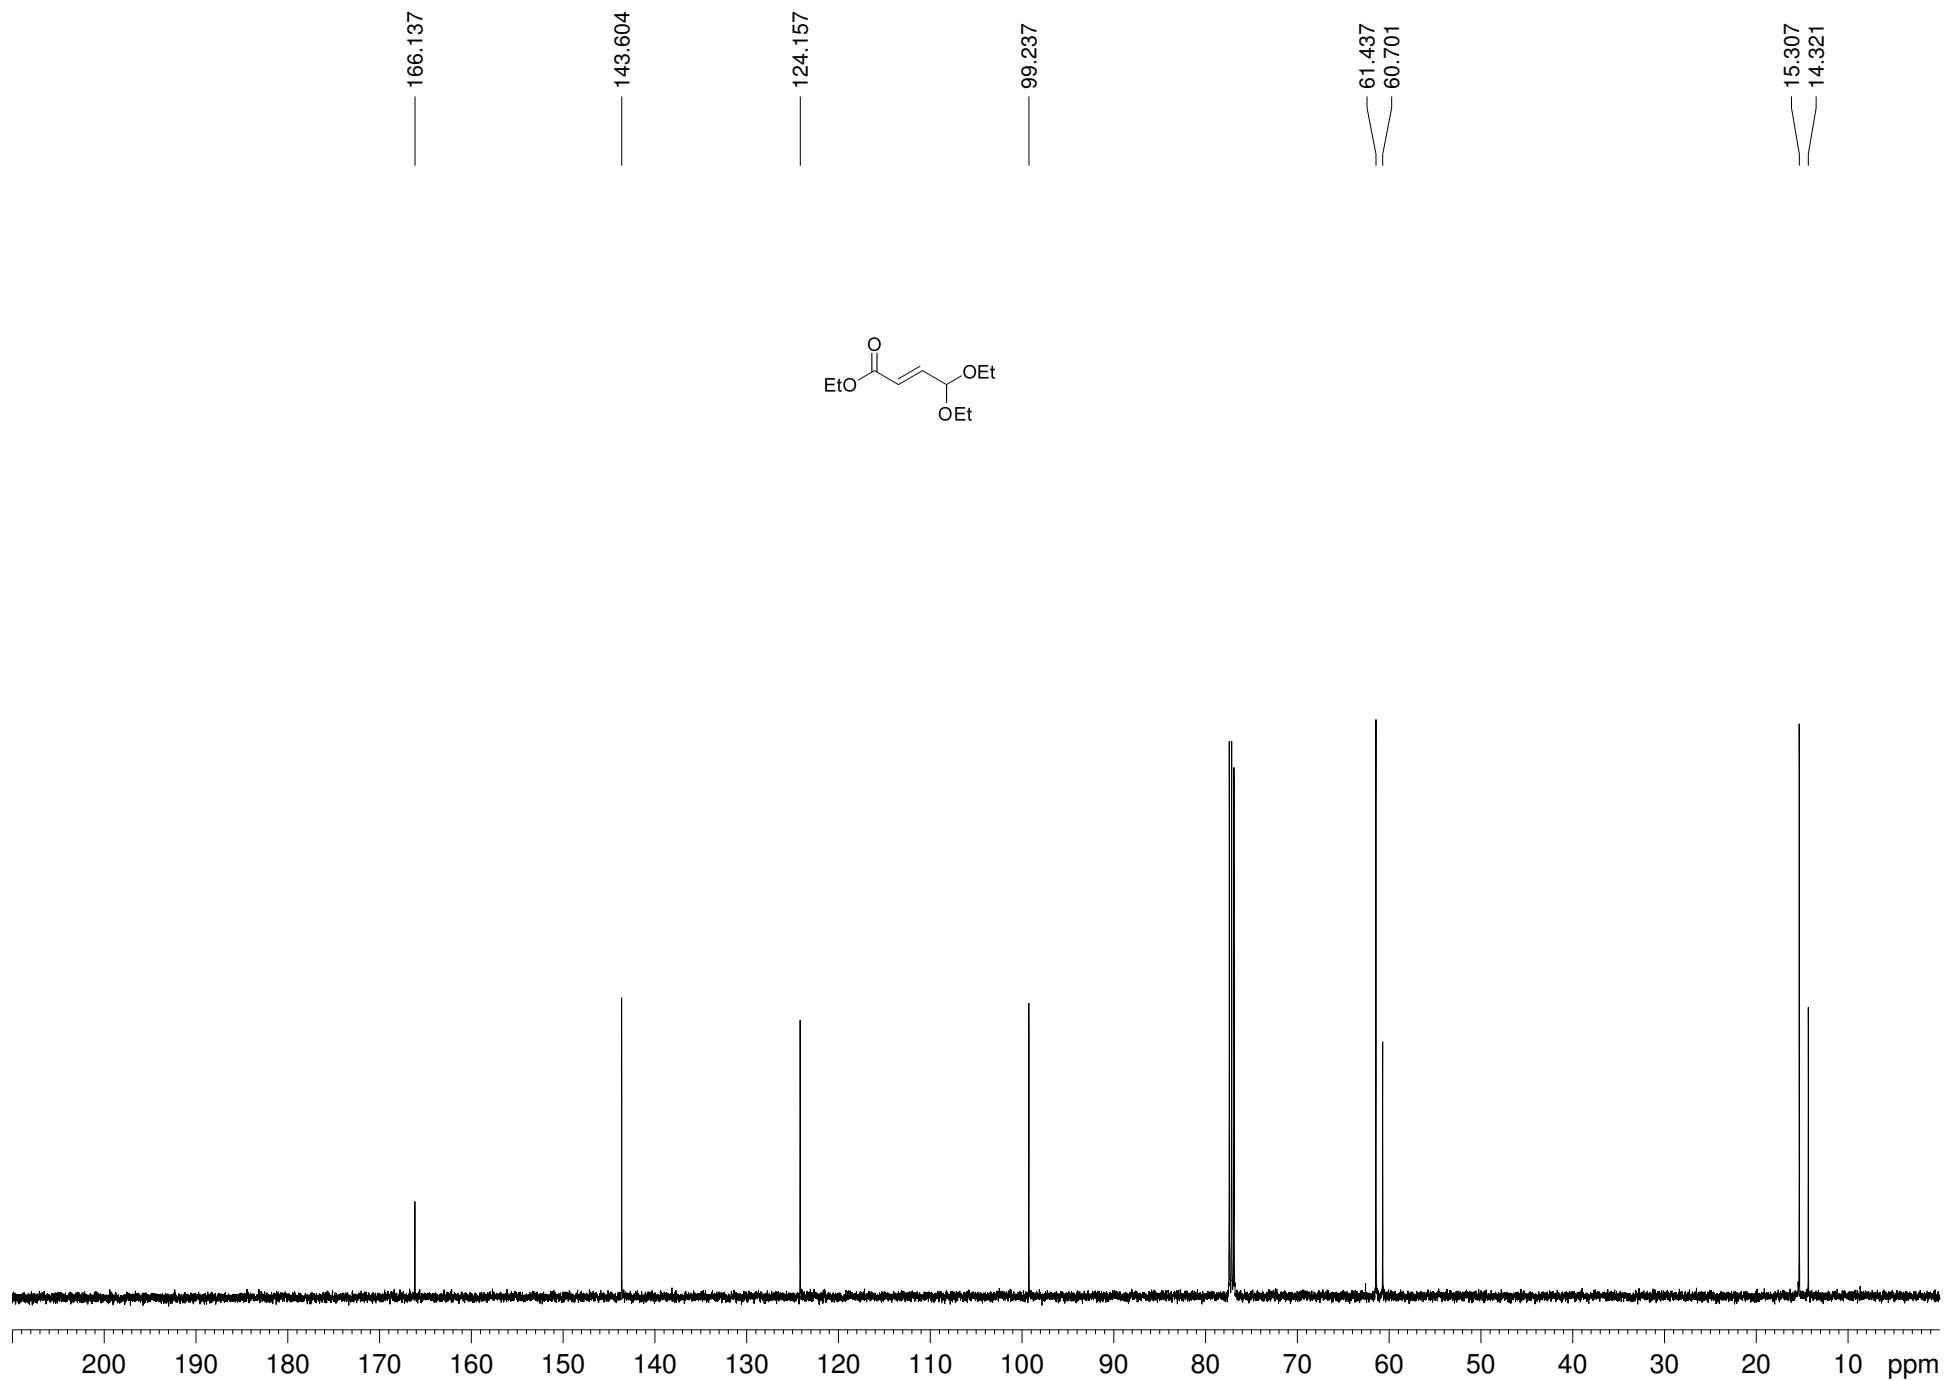

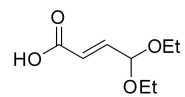

6.938  
6.930  
6.906  
6.898

6.175  
6.173  
6.144  
6.141

5.092  
5.090  
5.084  
5.082

3.688  
3.674  
3.670  
3.660  
3.656  
3.646  
3.641  
3.627  
3.573  
3.559  
3.554  
3.545  
3.540  
3.530  
3.526  
3.511

1.247  
1.233  
1.219

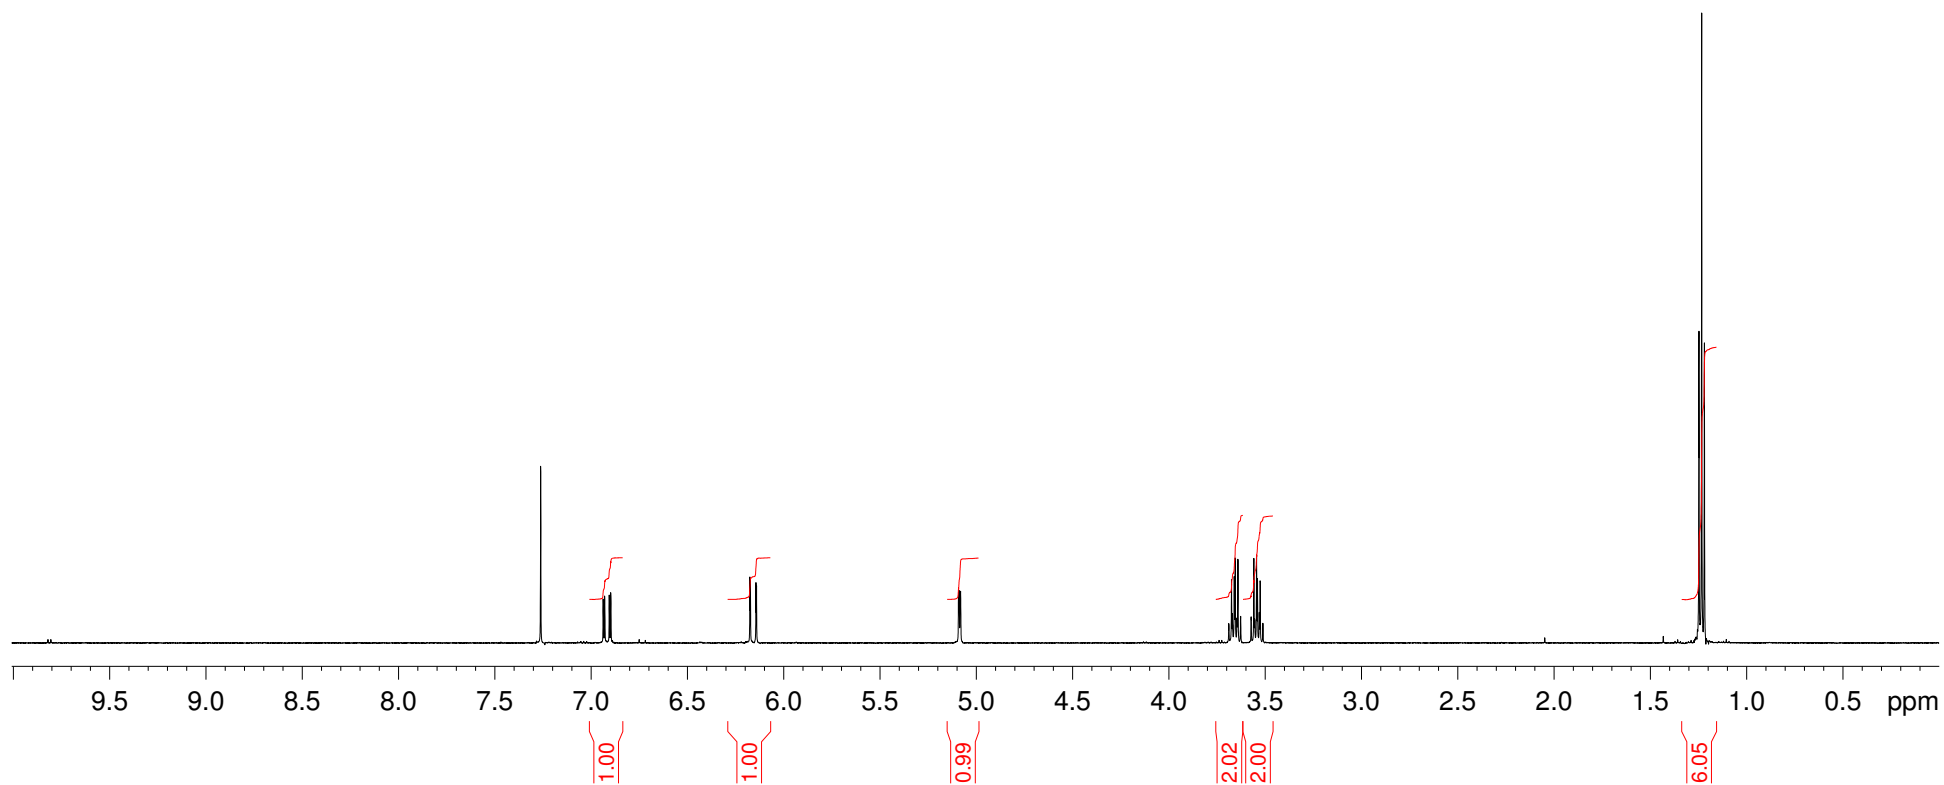

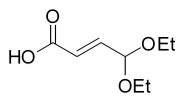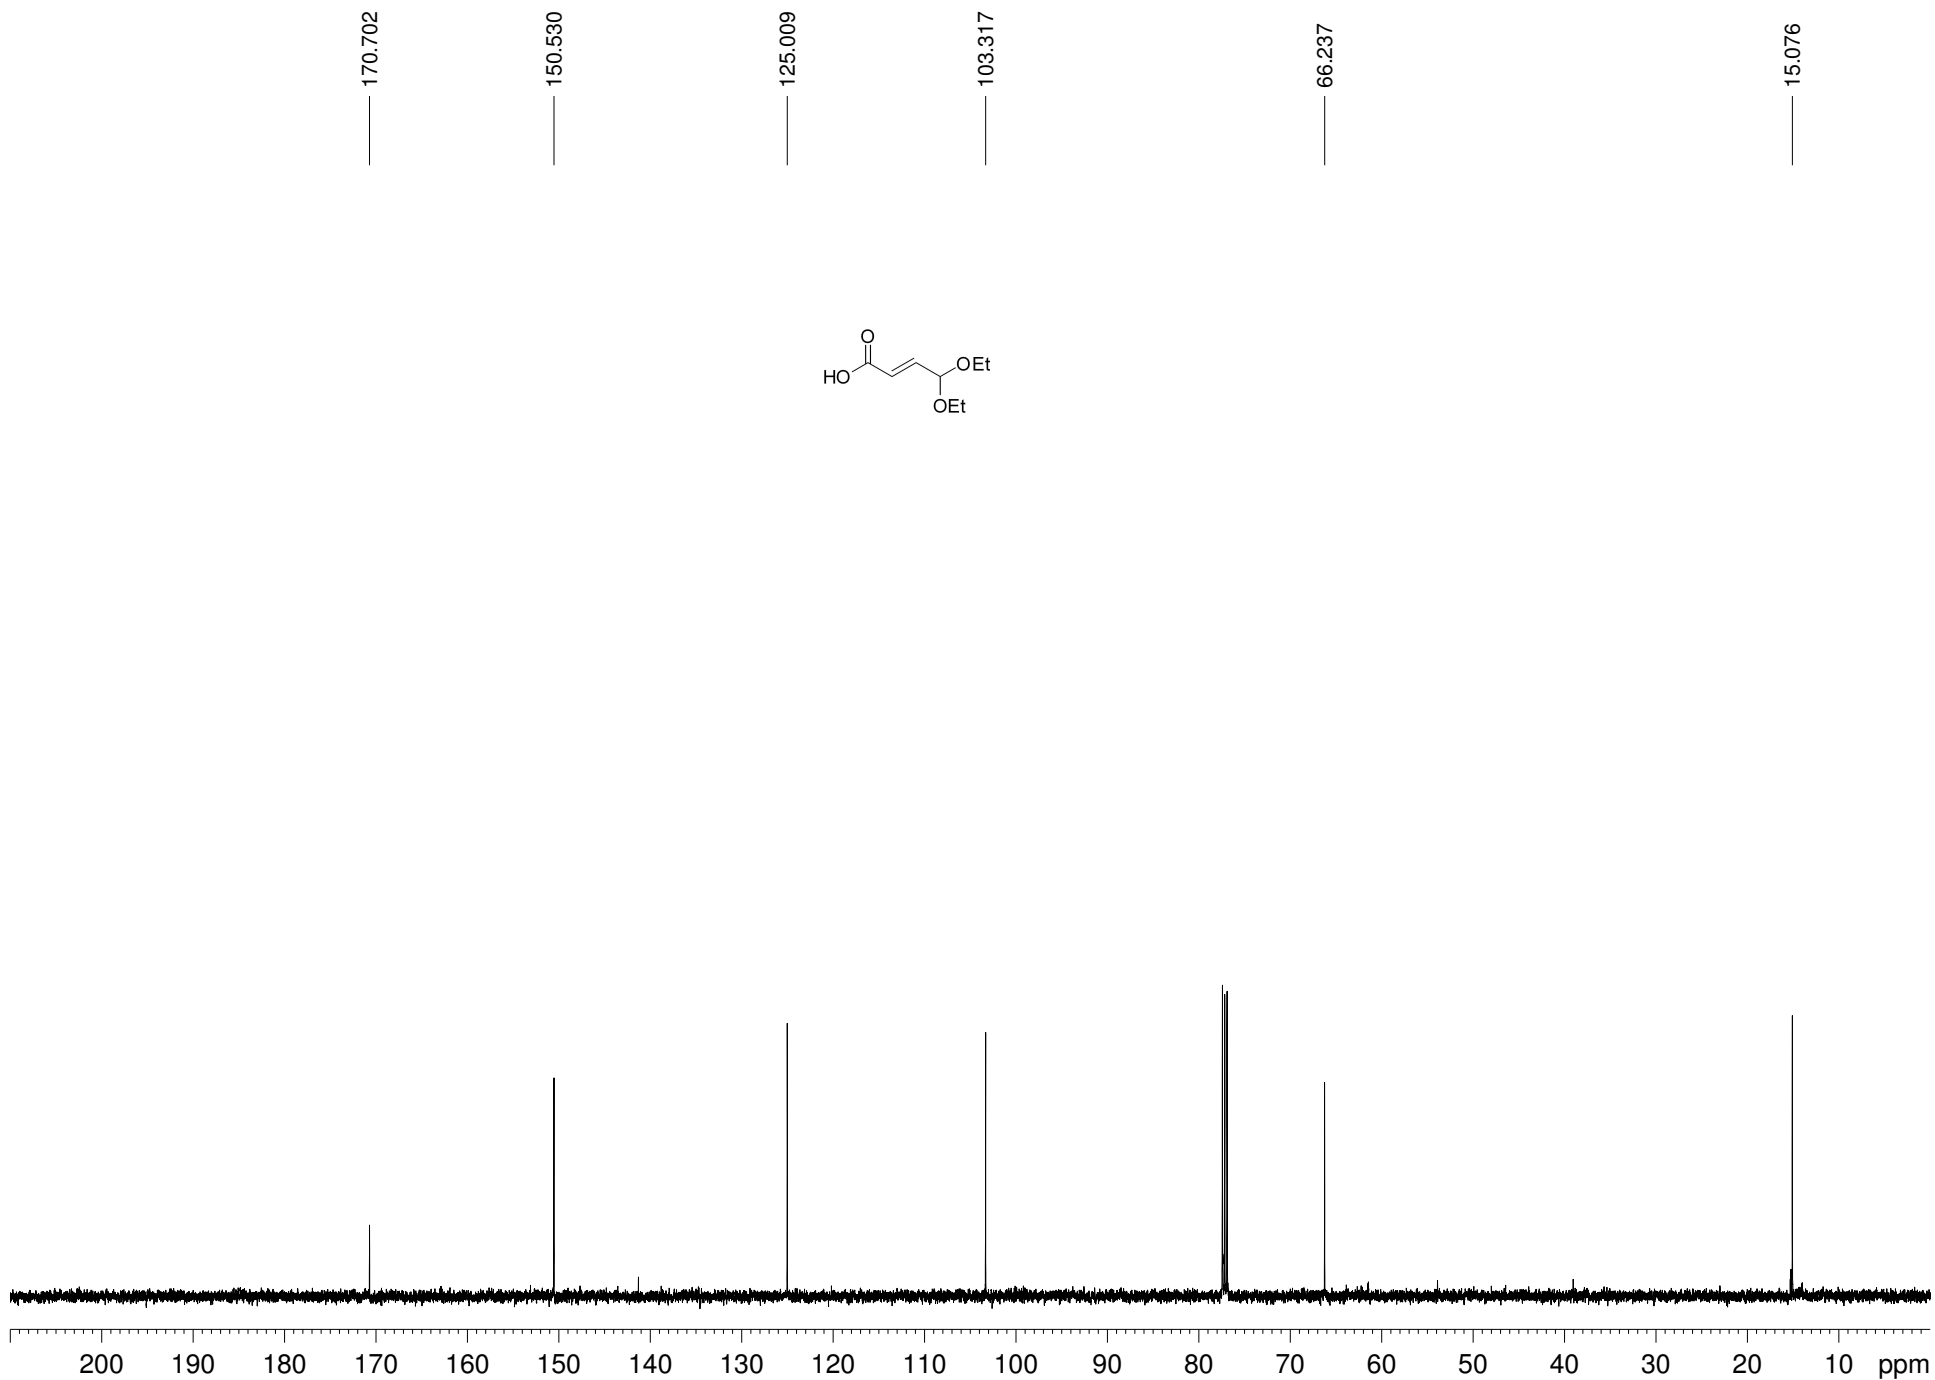

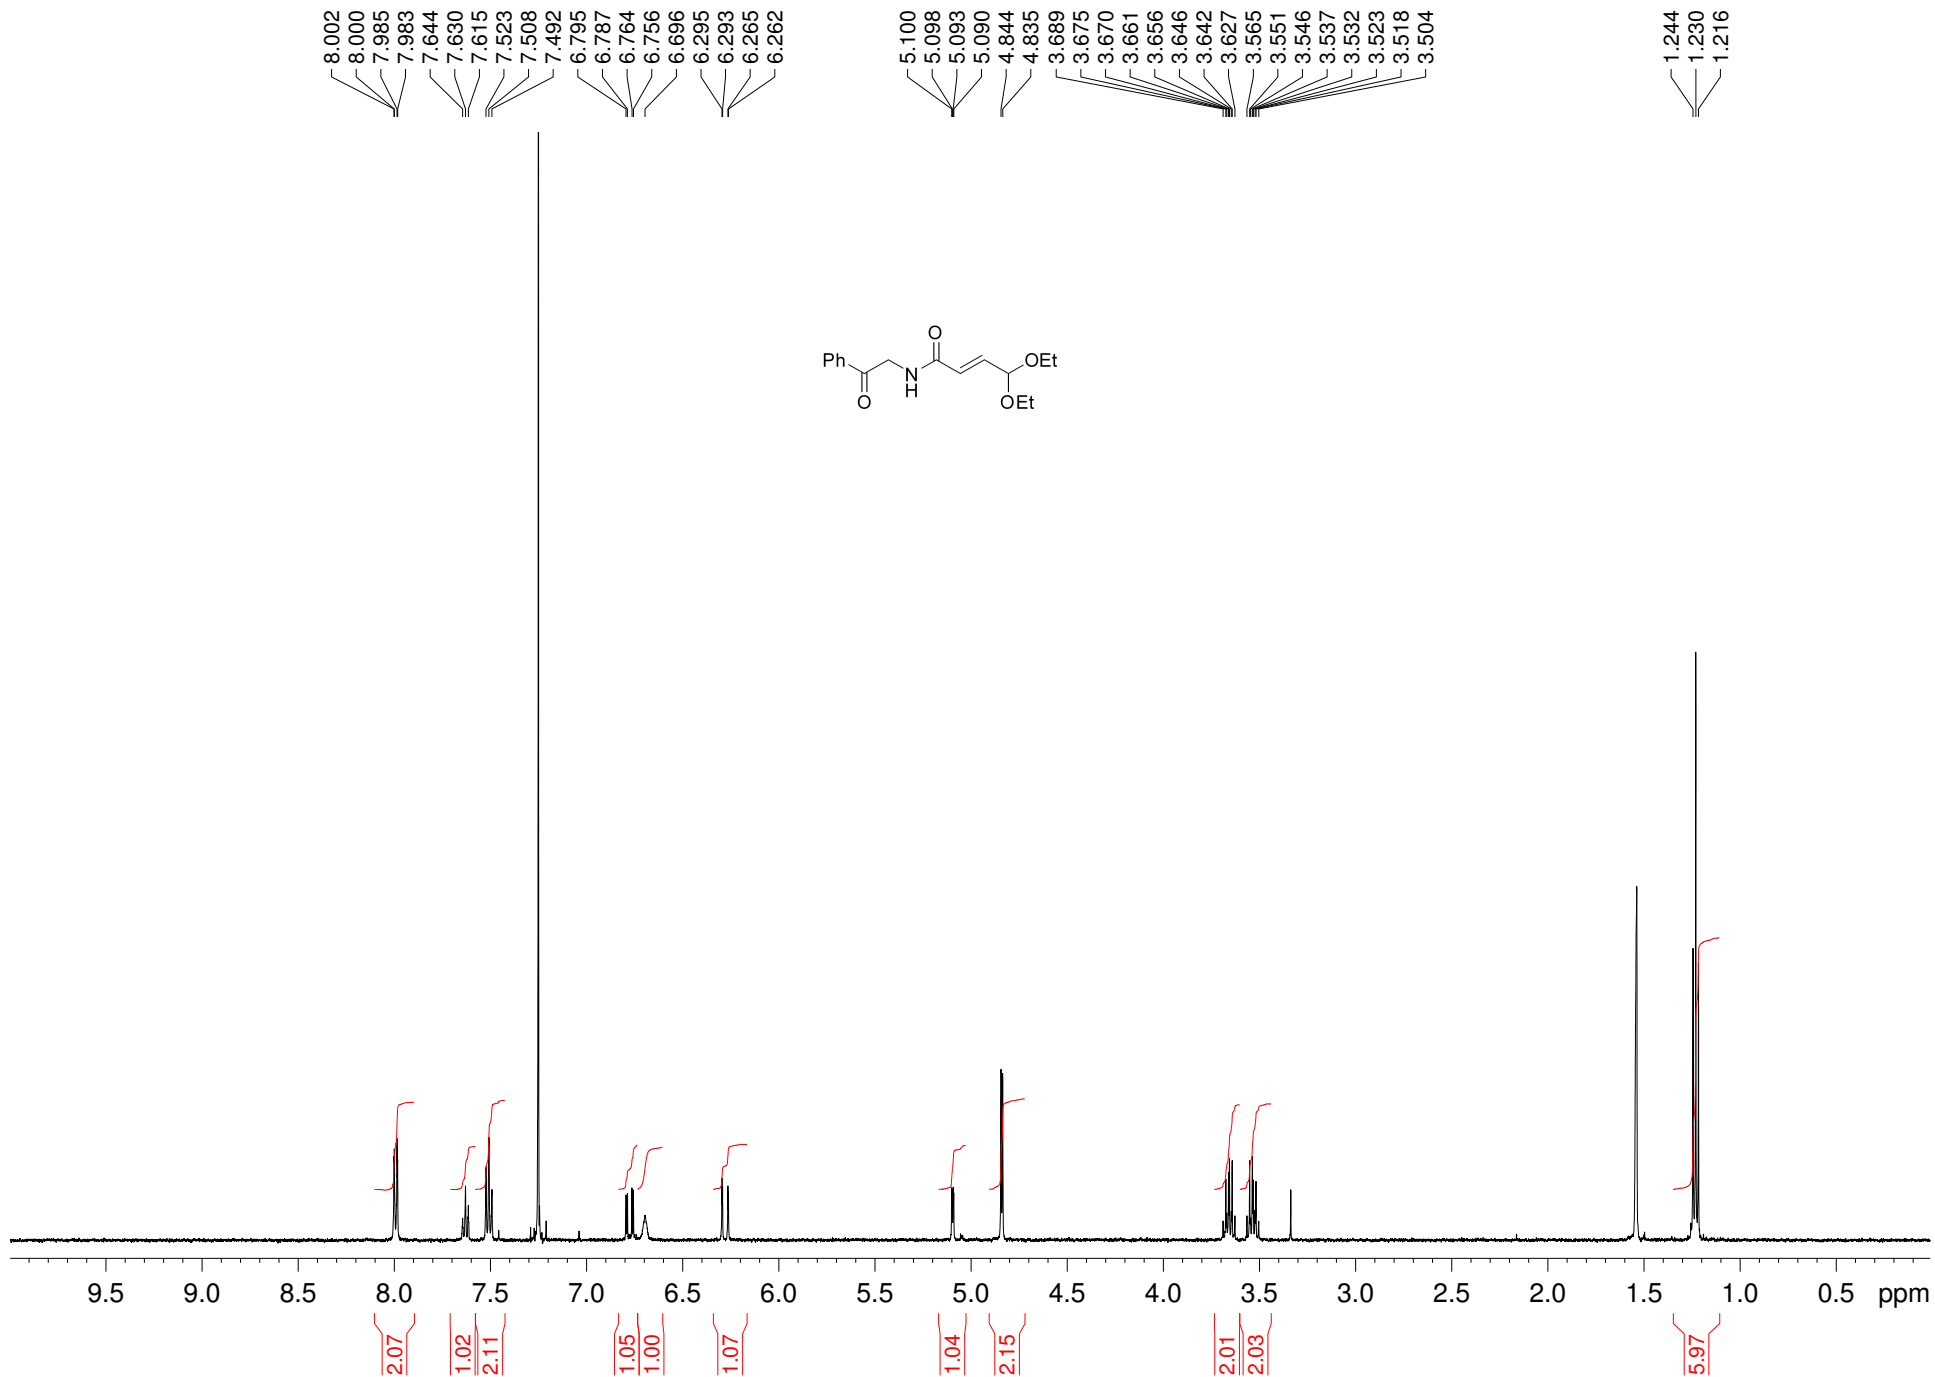

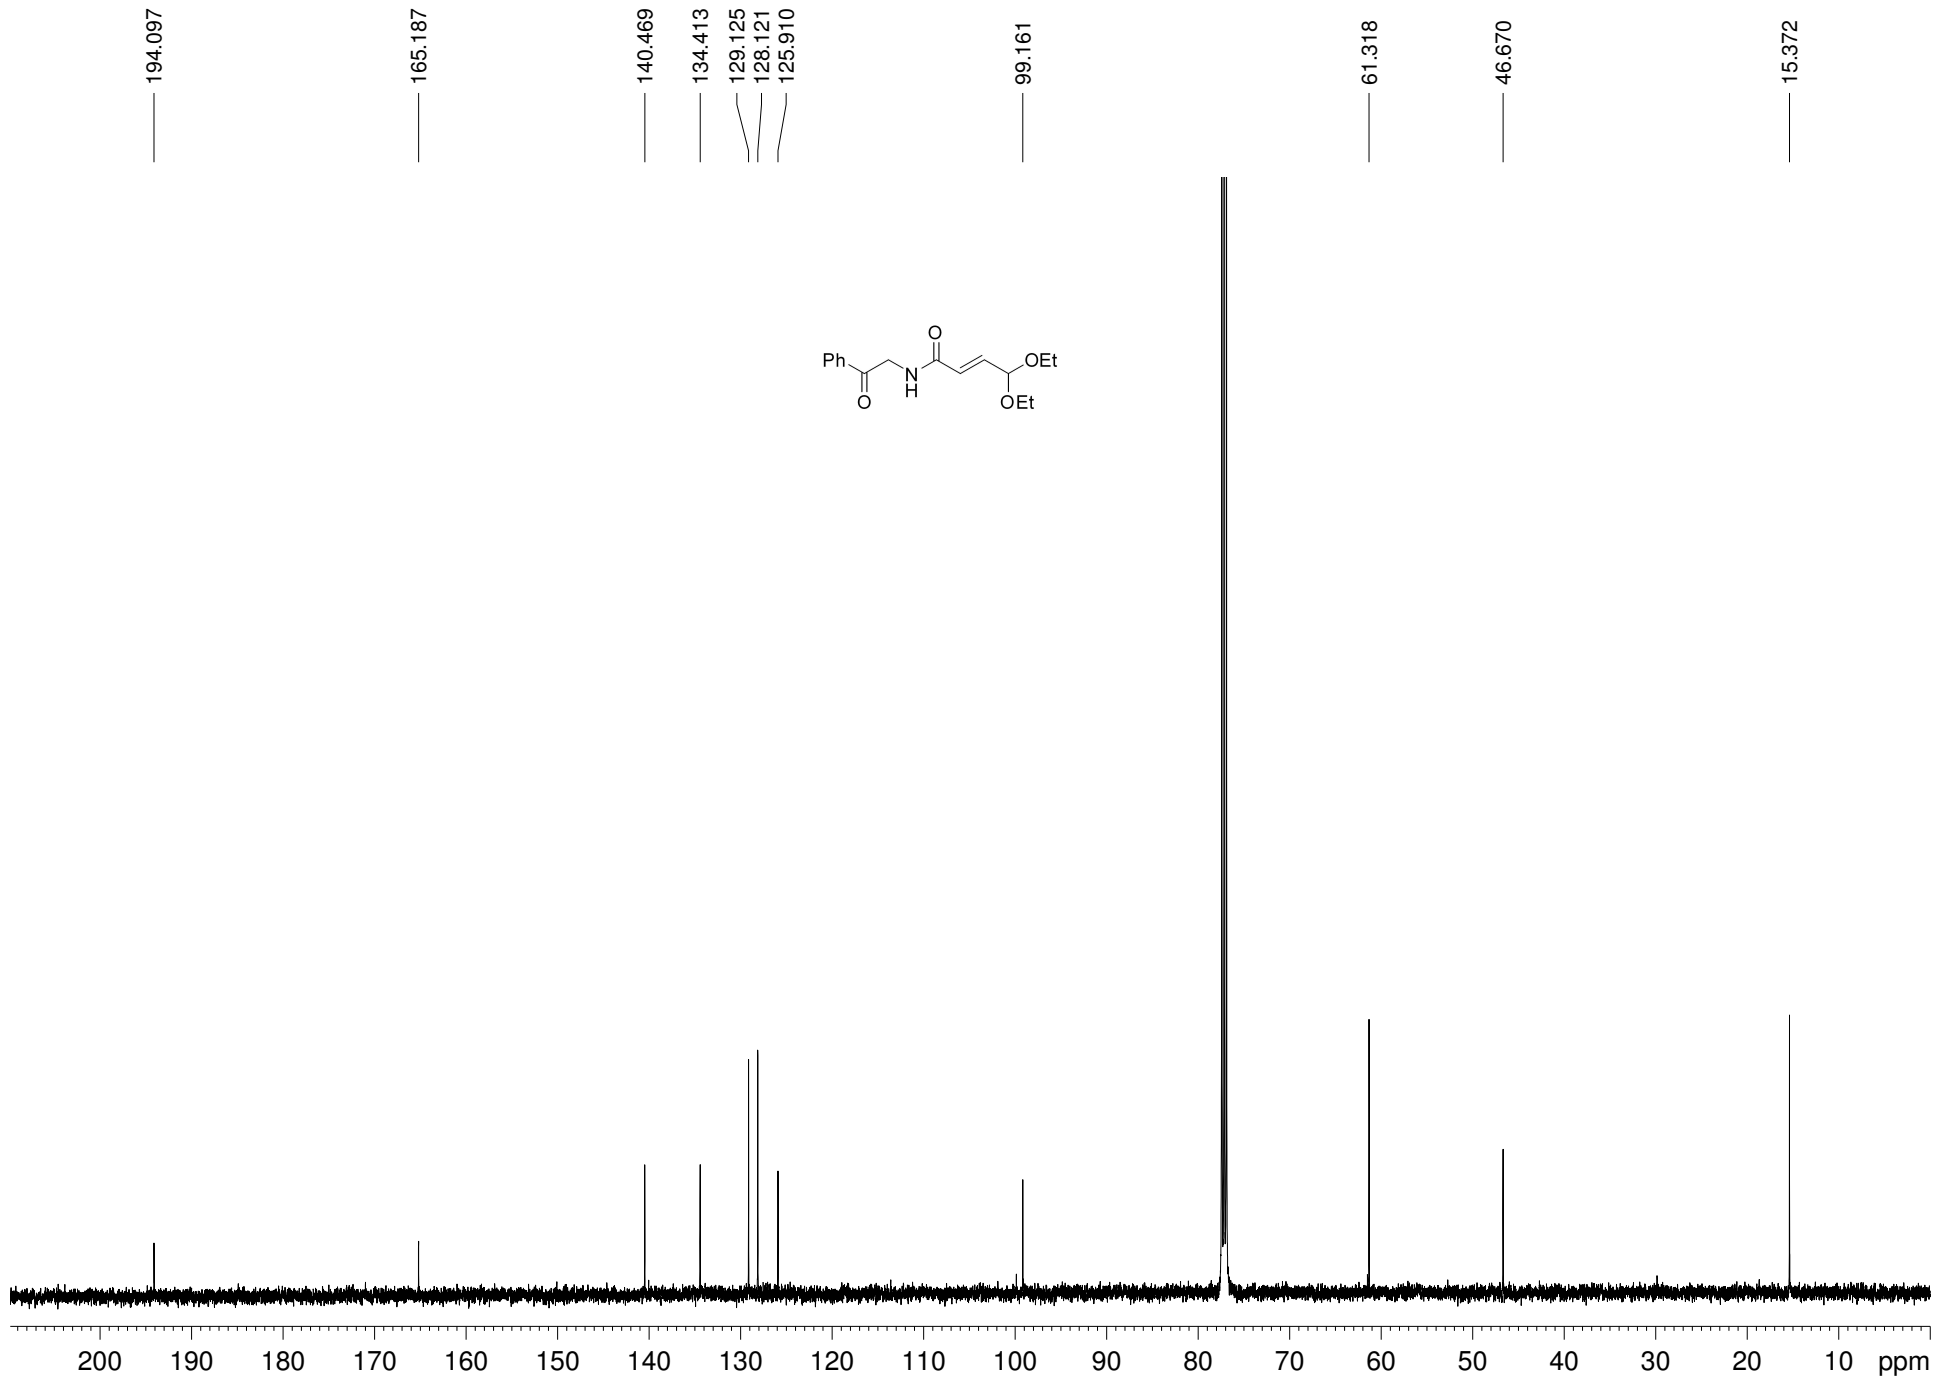

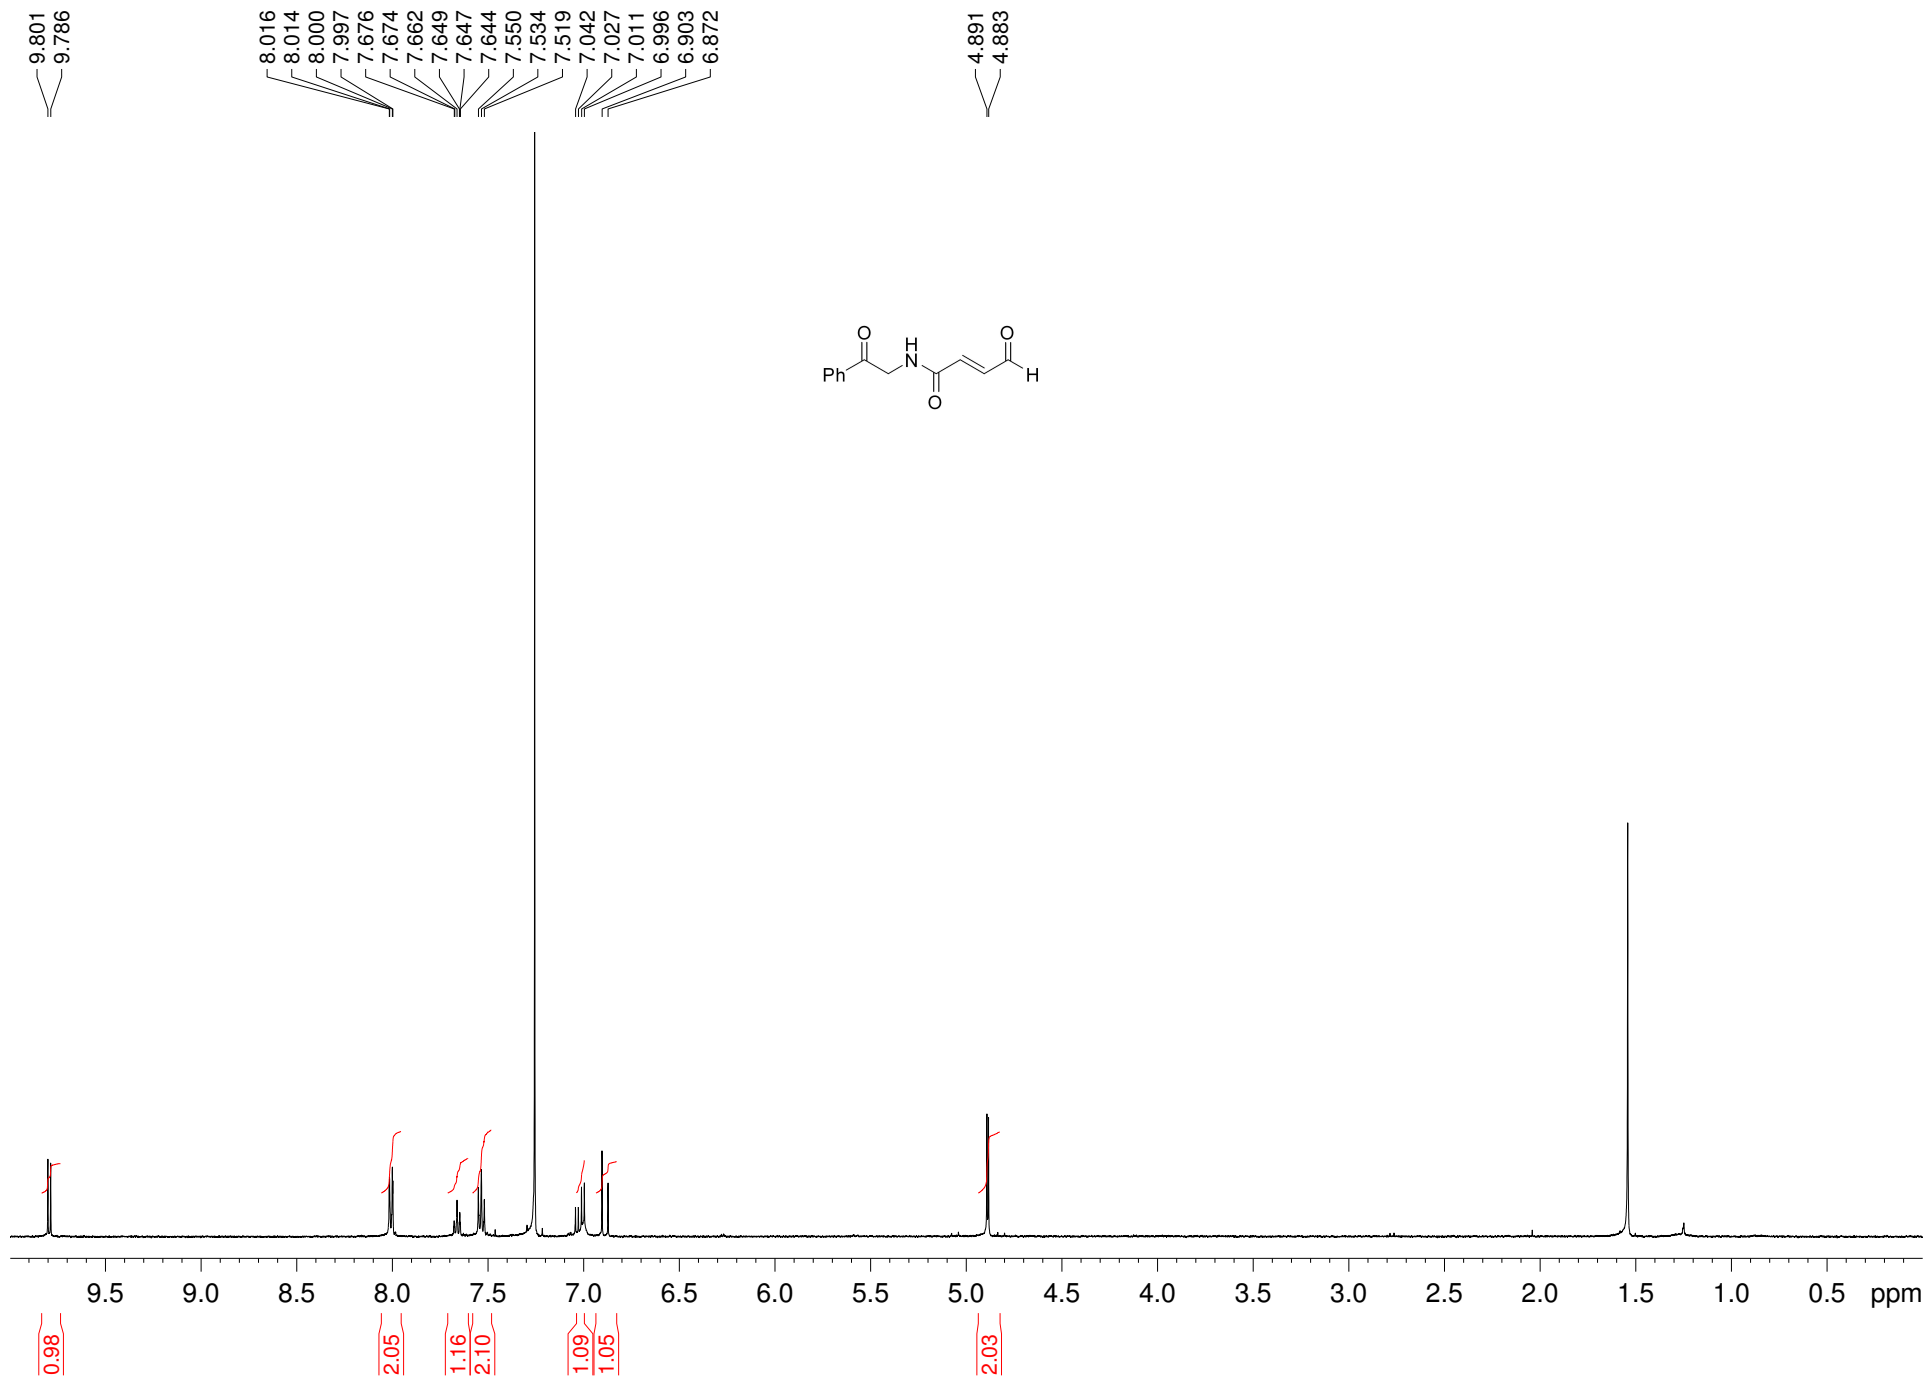

193.505  
192.434

163.454

141.443  
138.271  
134.711  
129.235  
129.127  
128.166

46.823

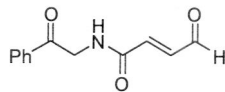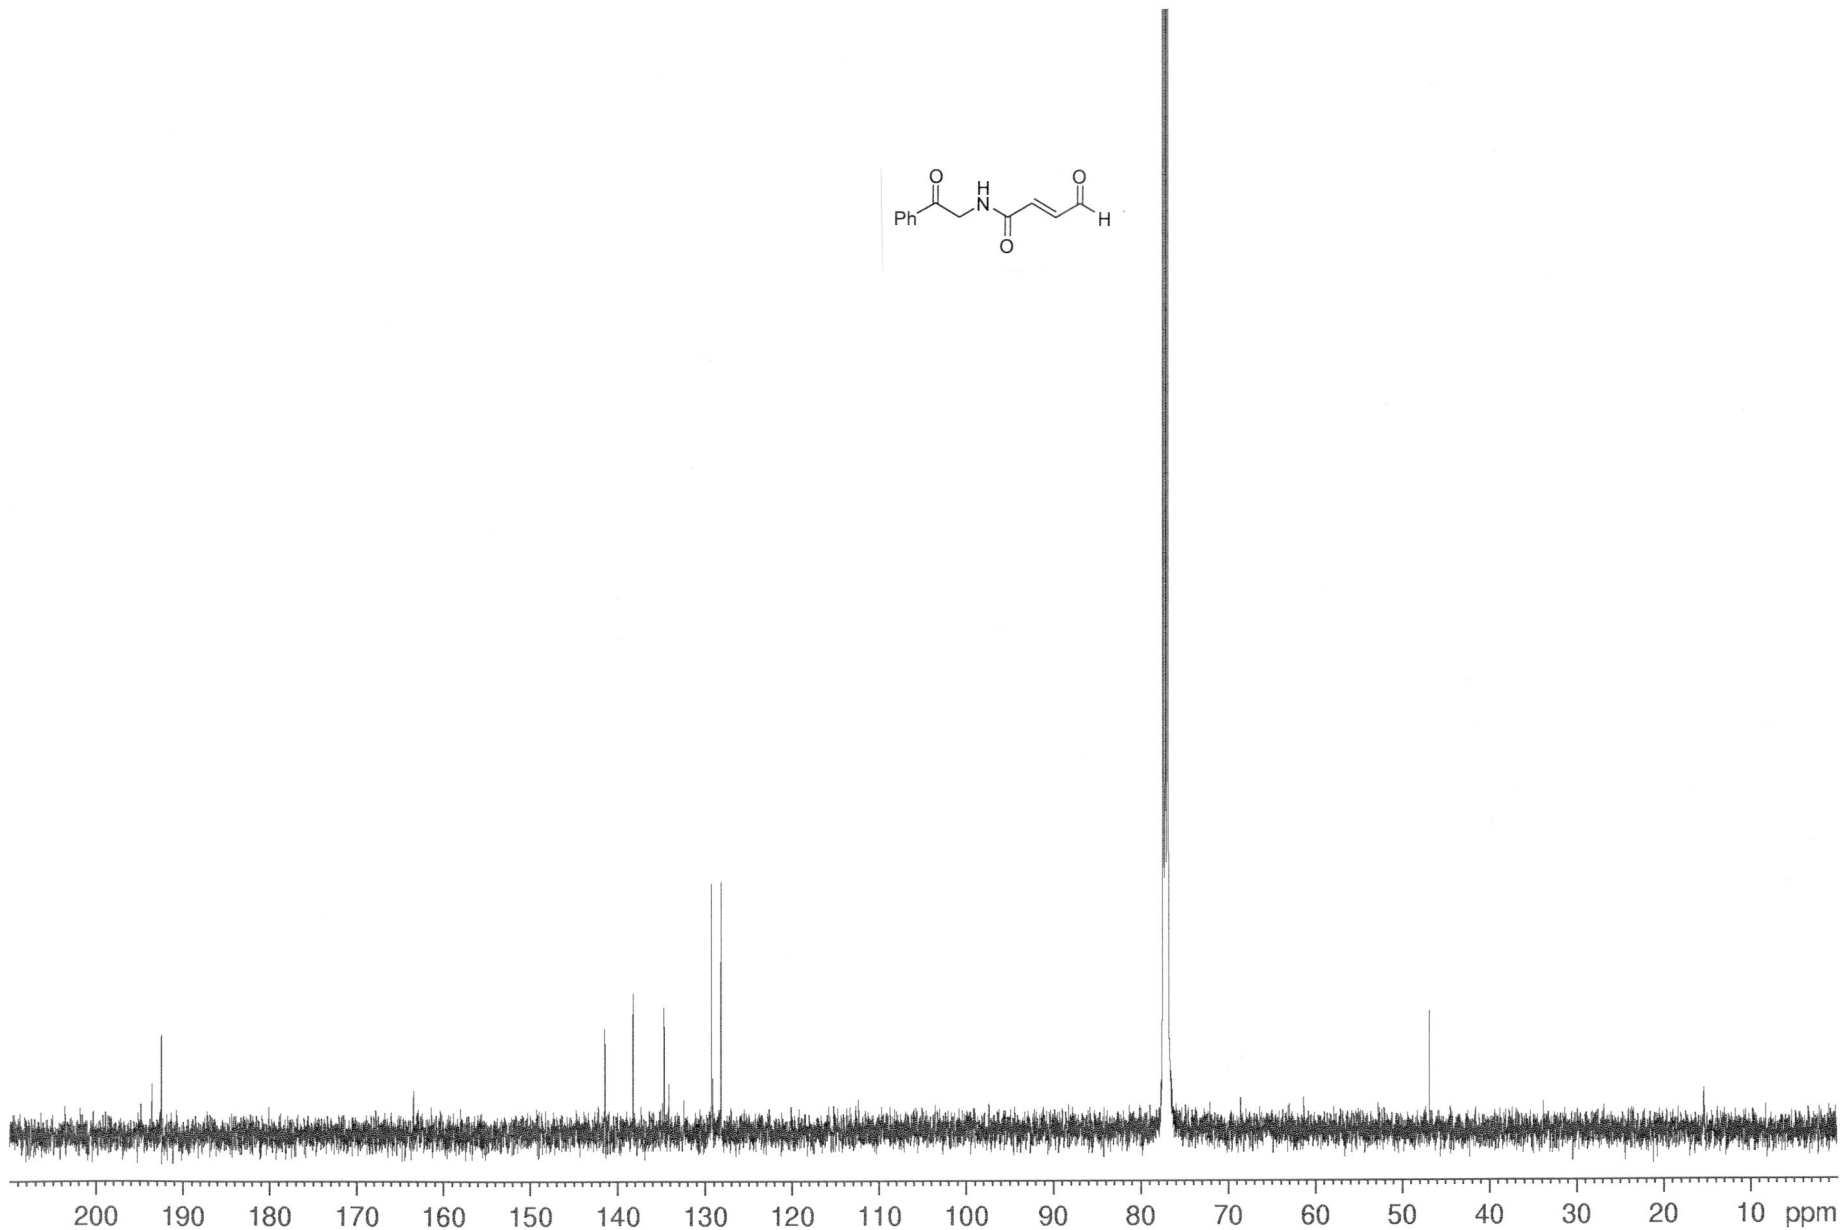



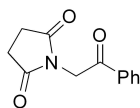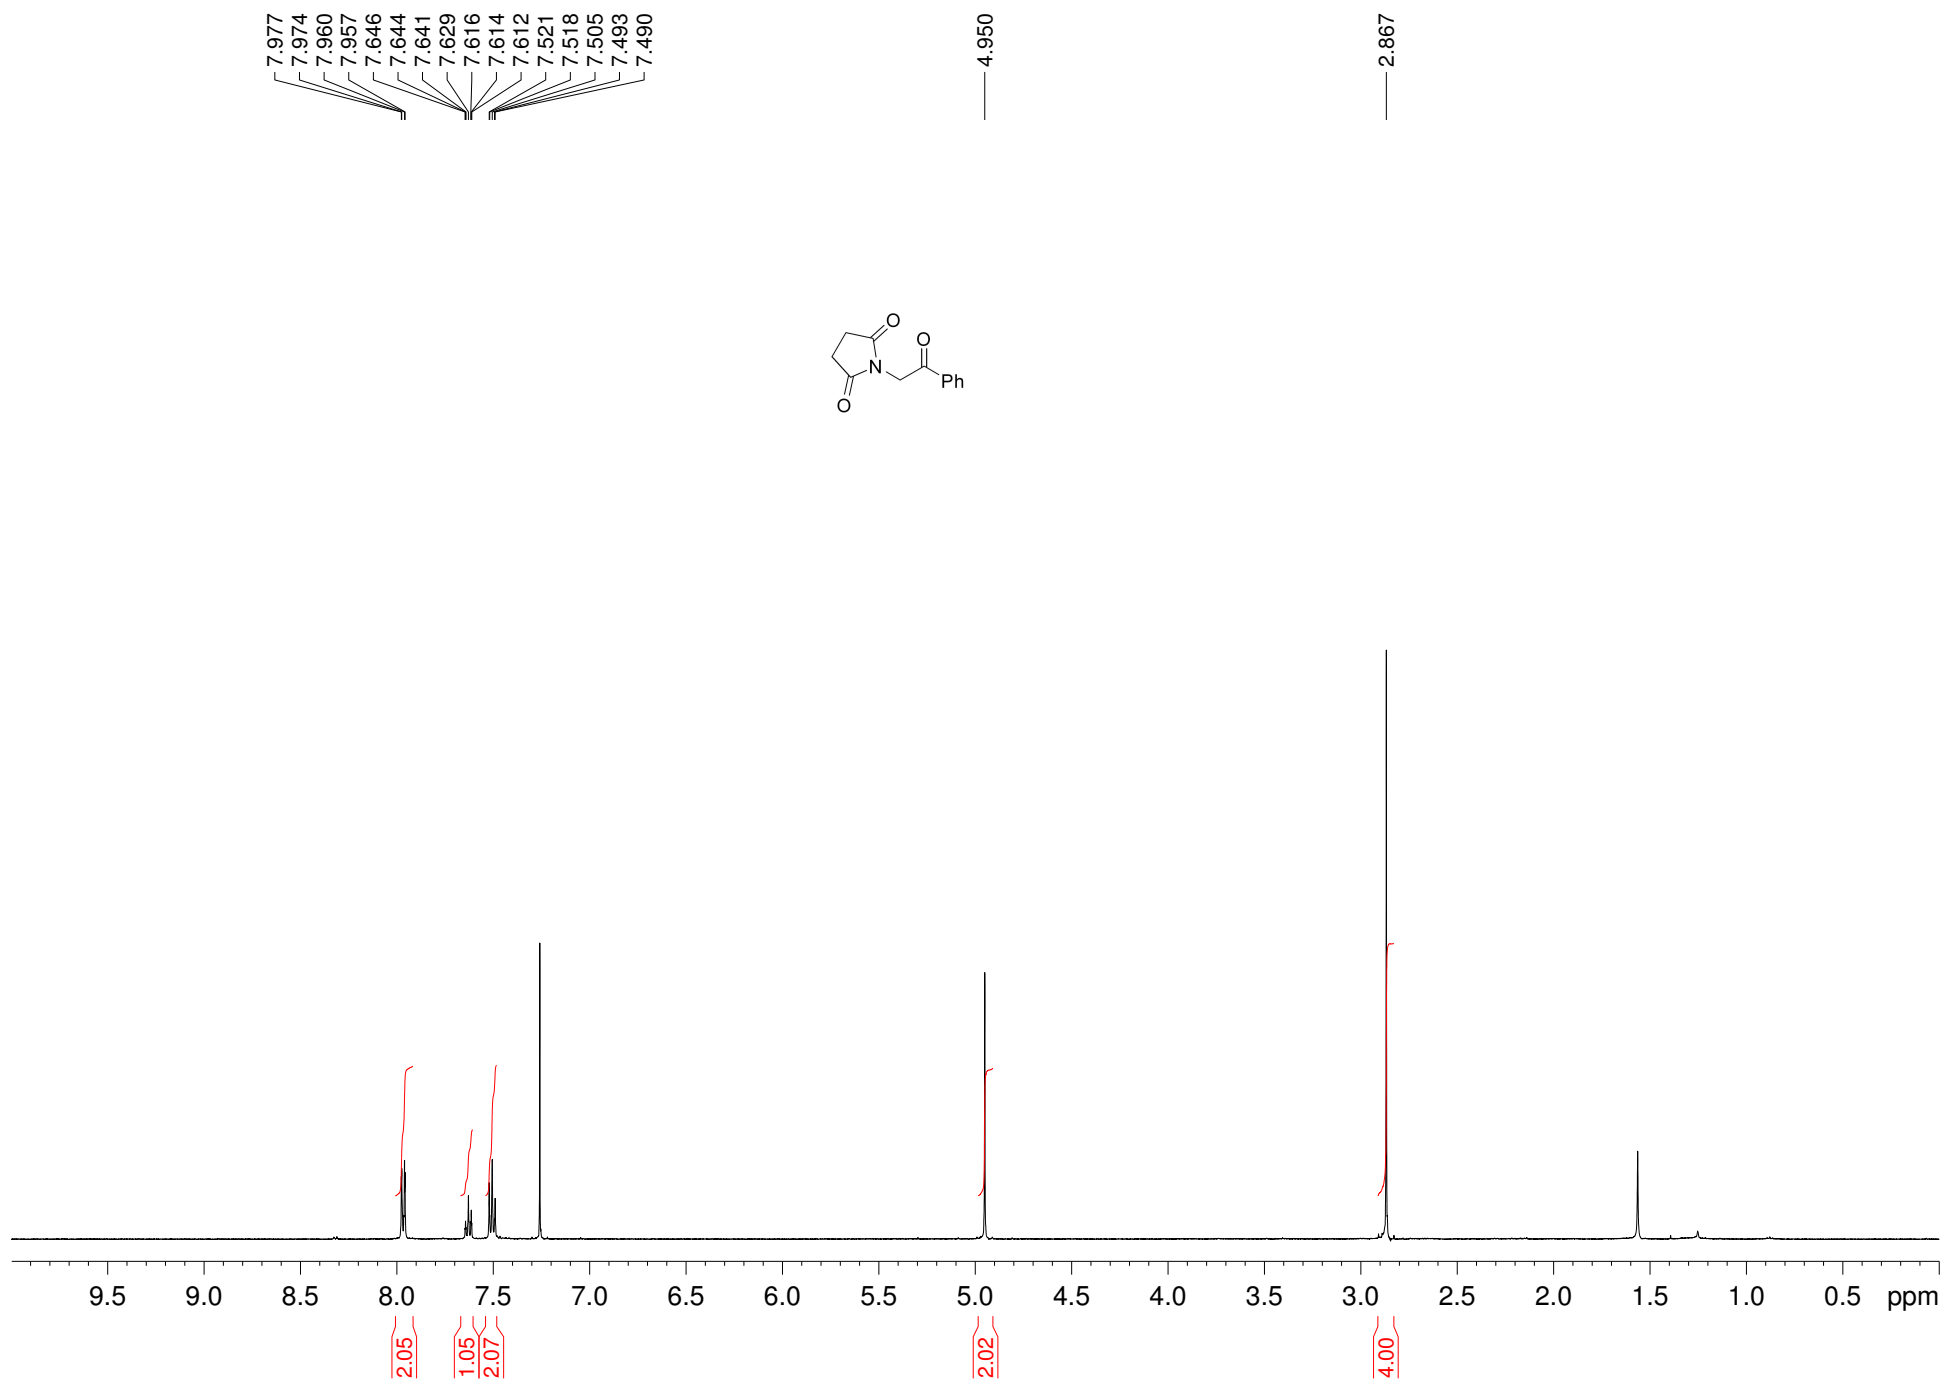

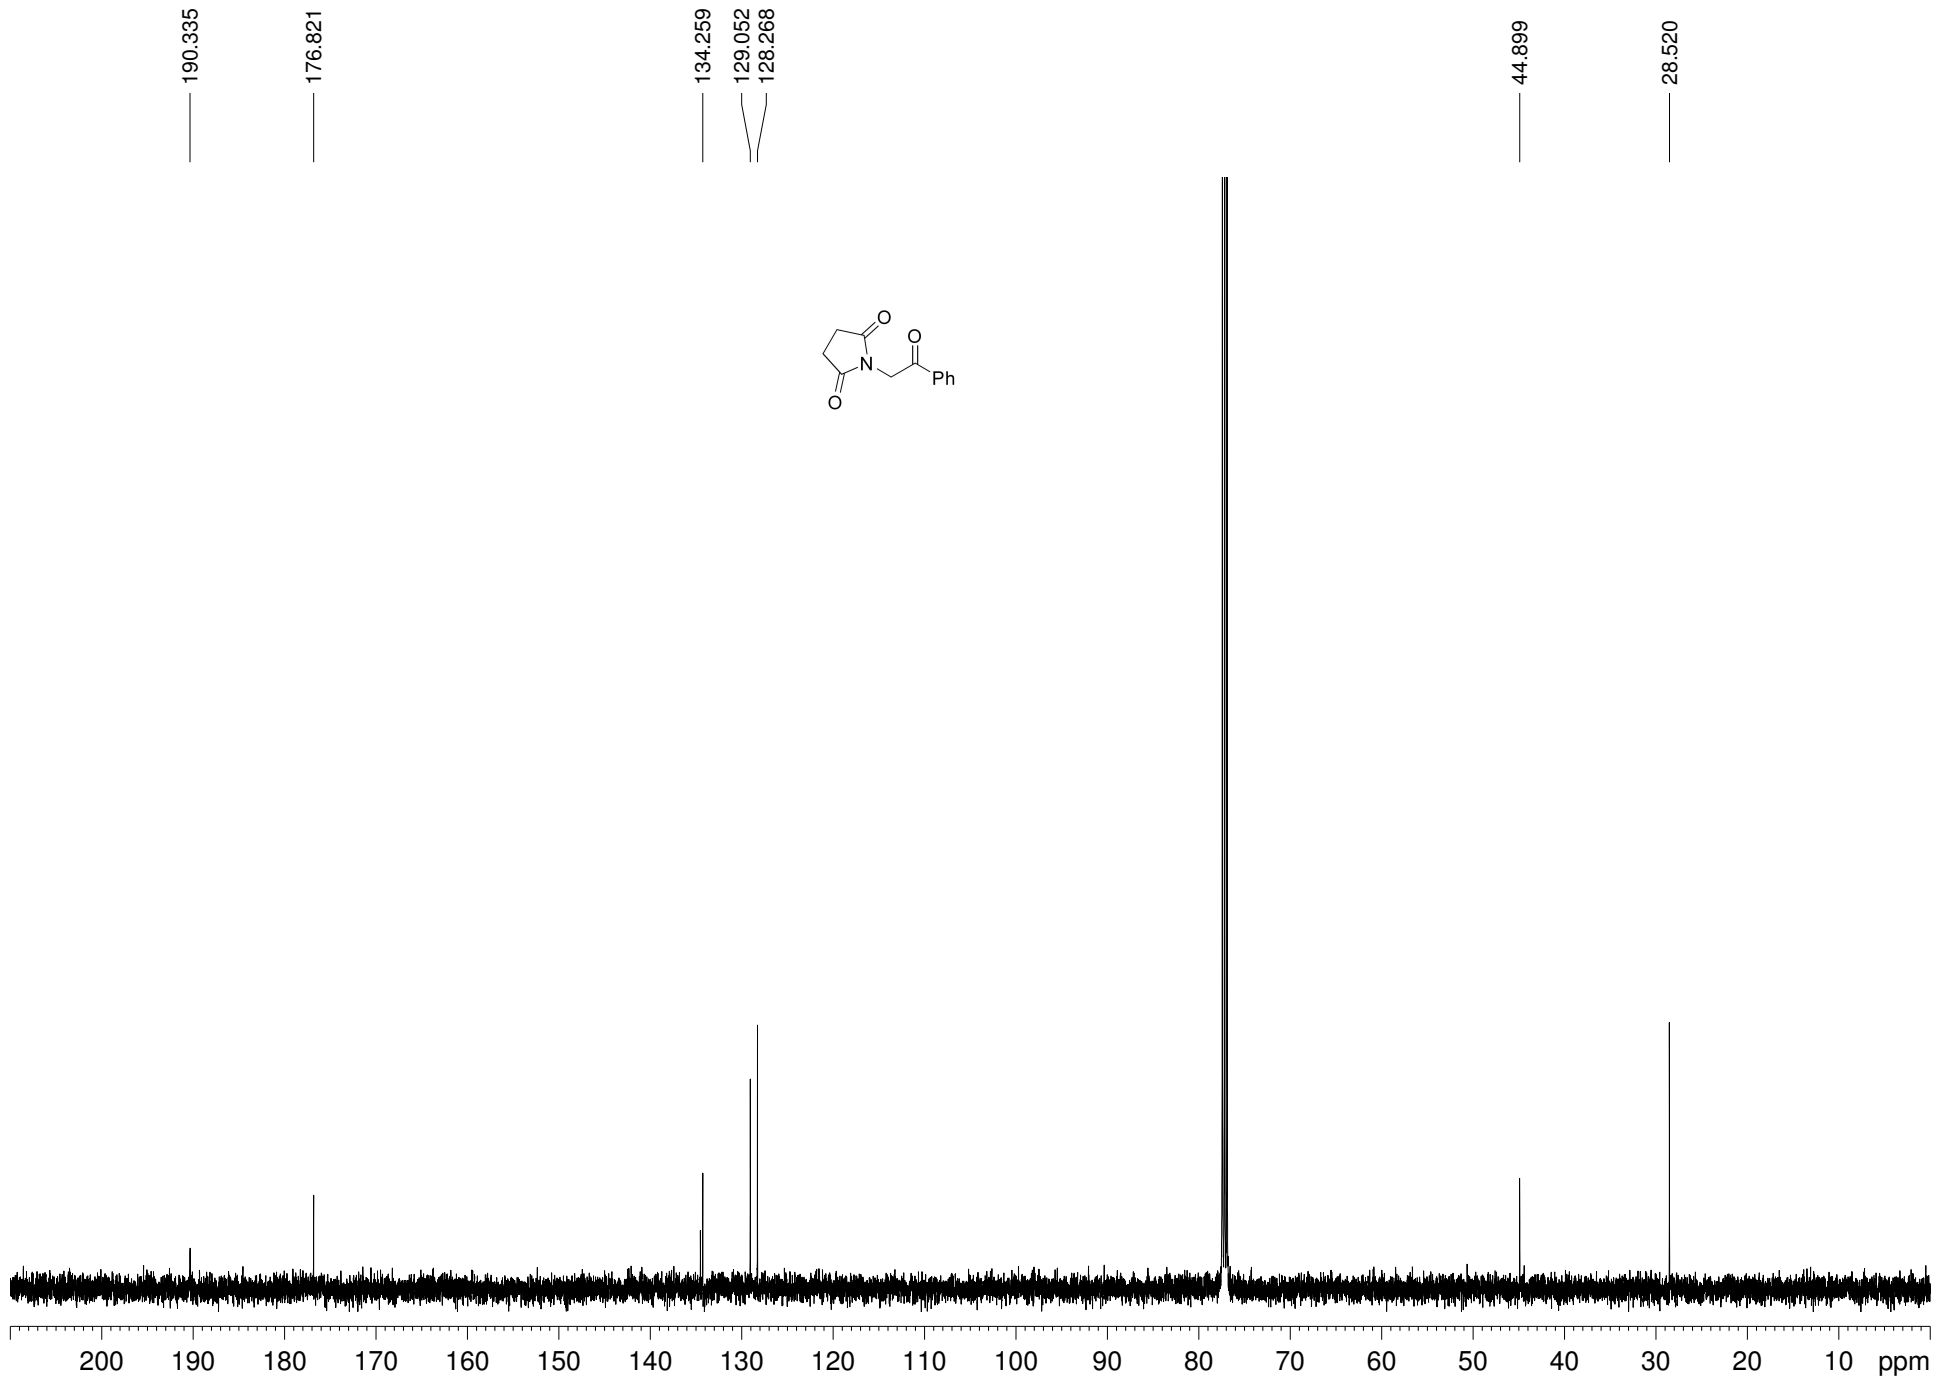

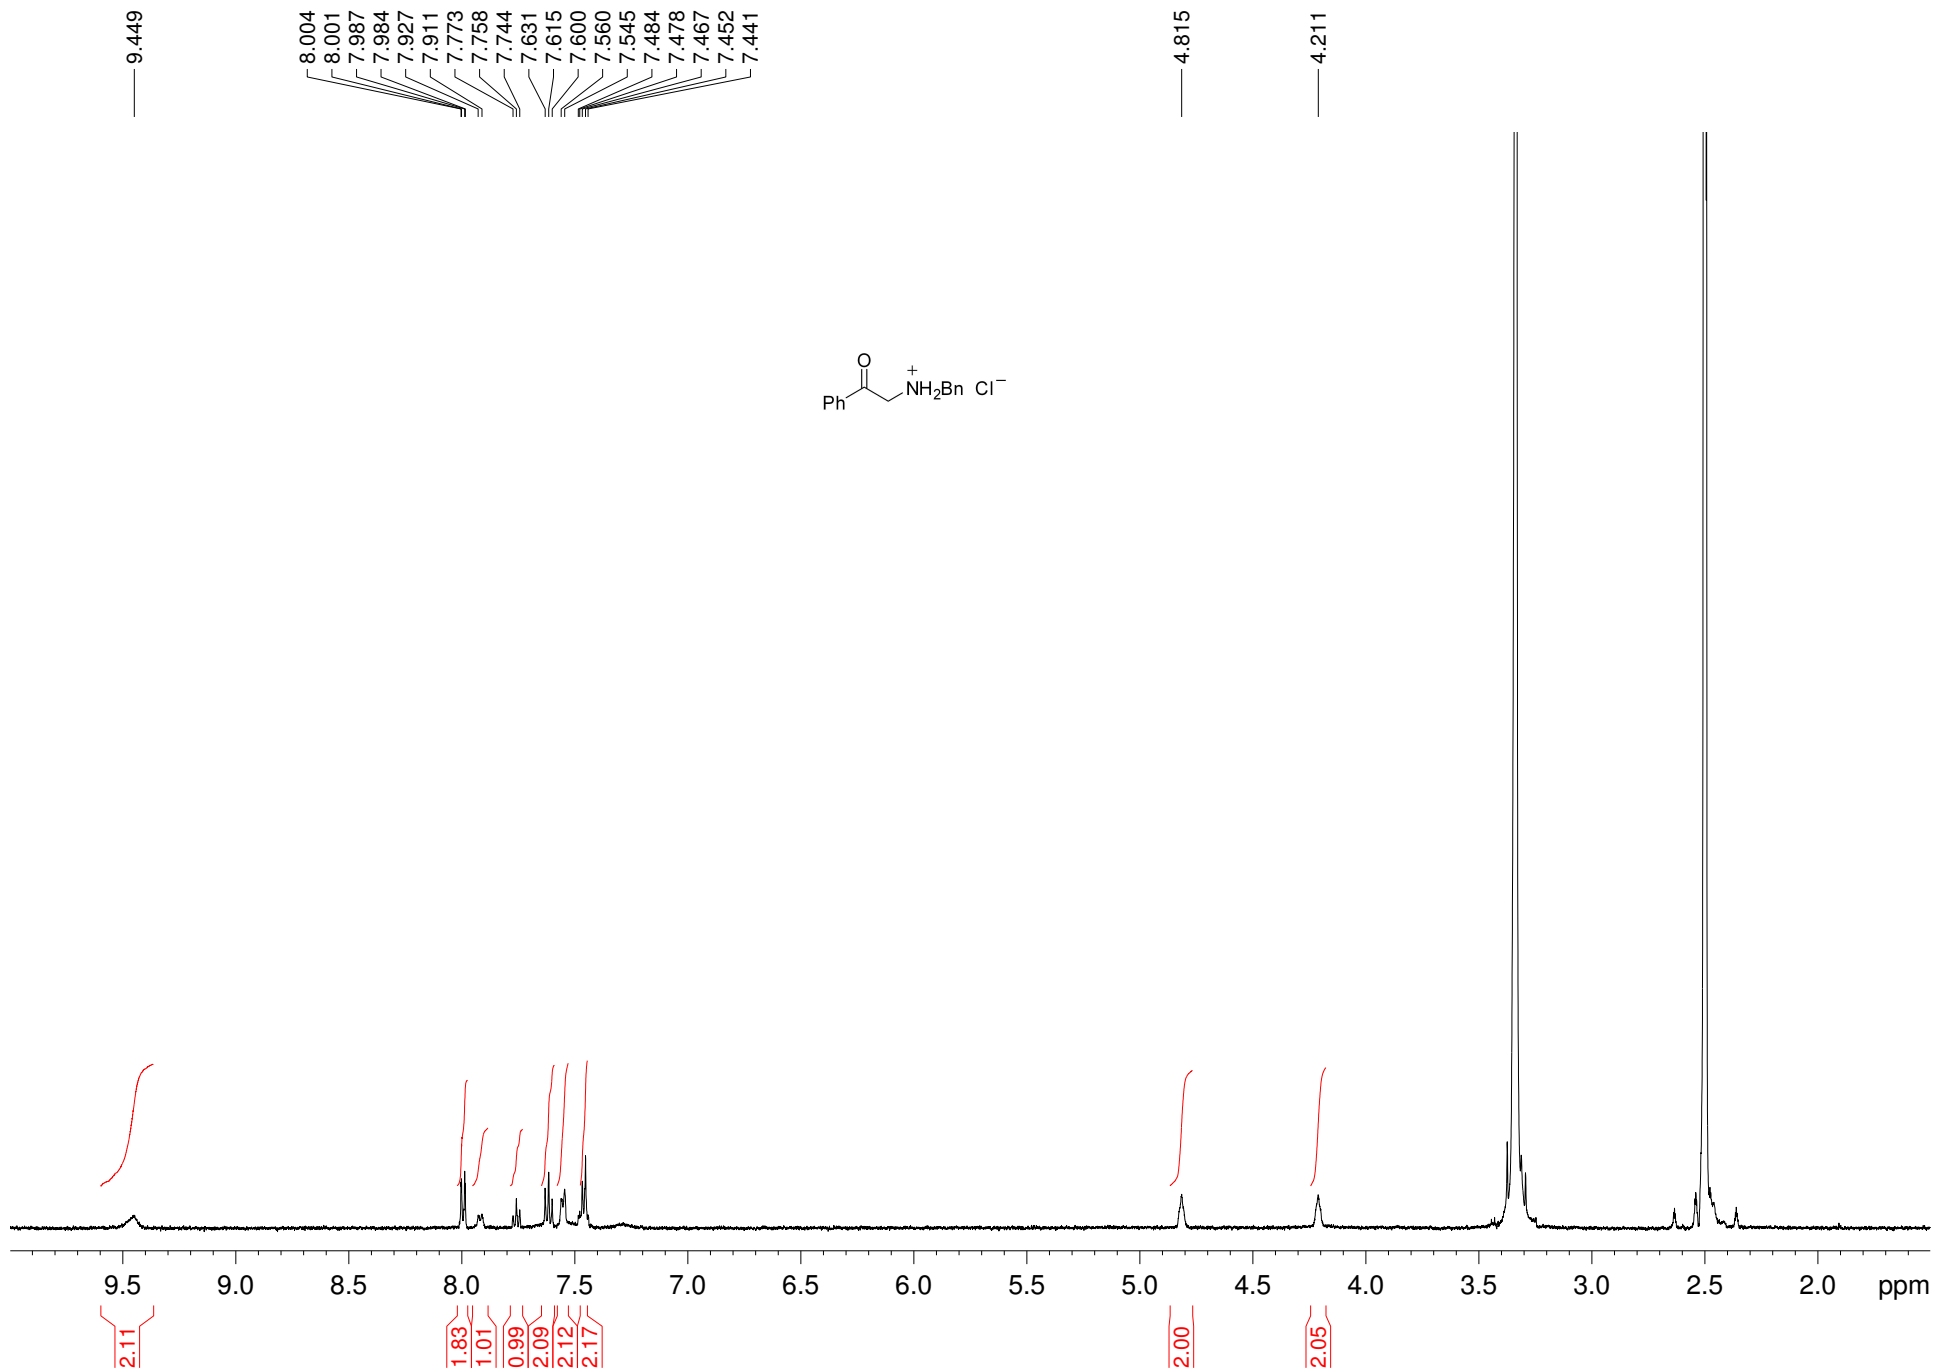

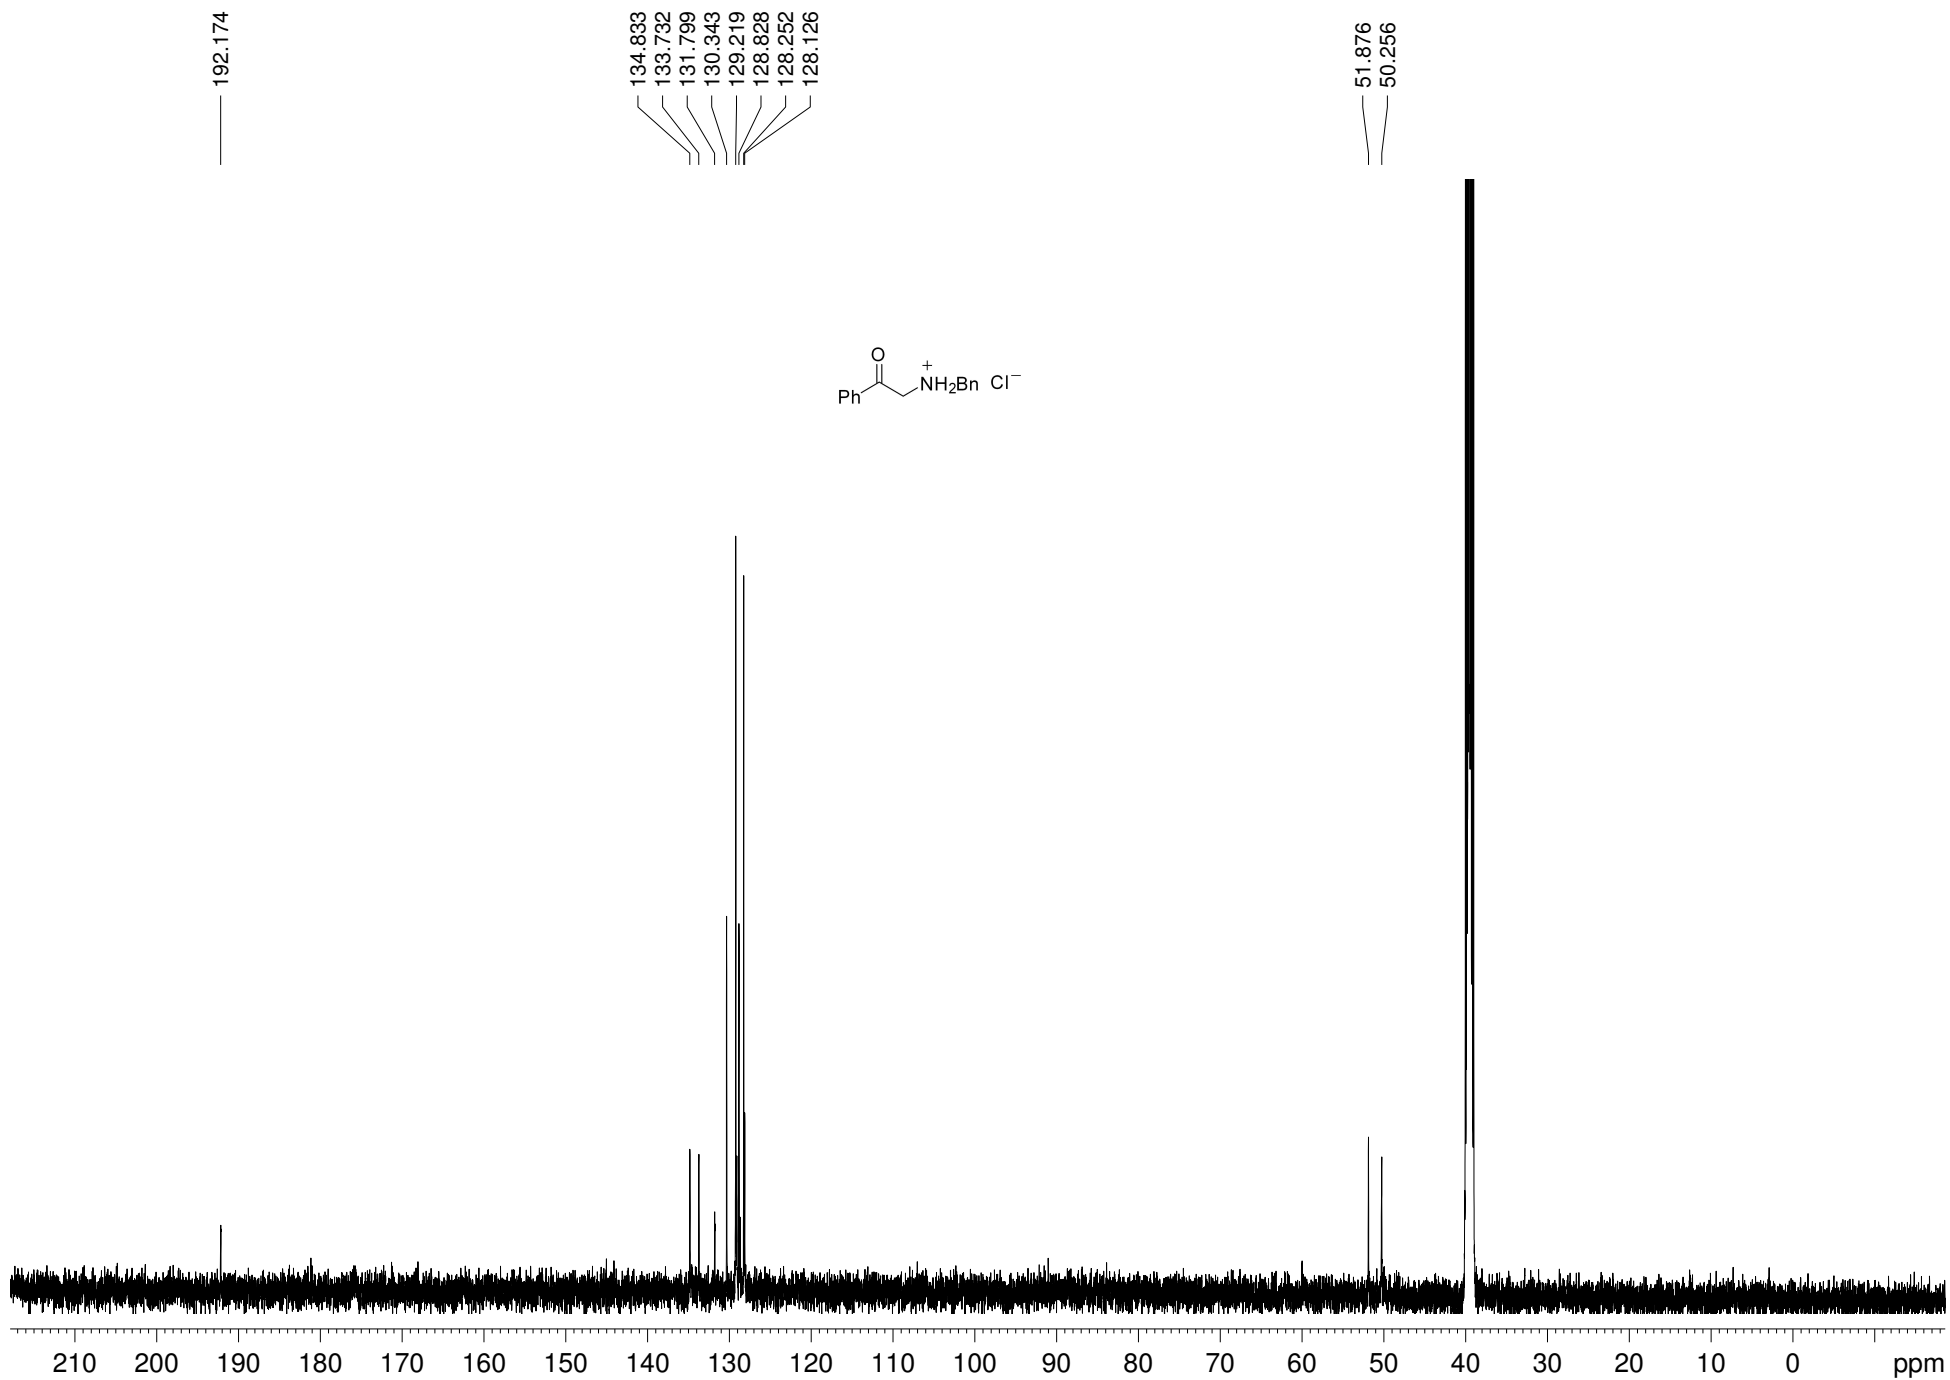

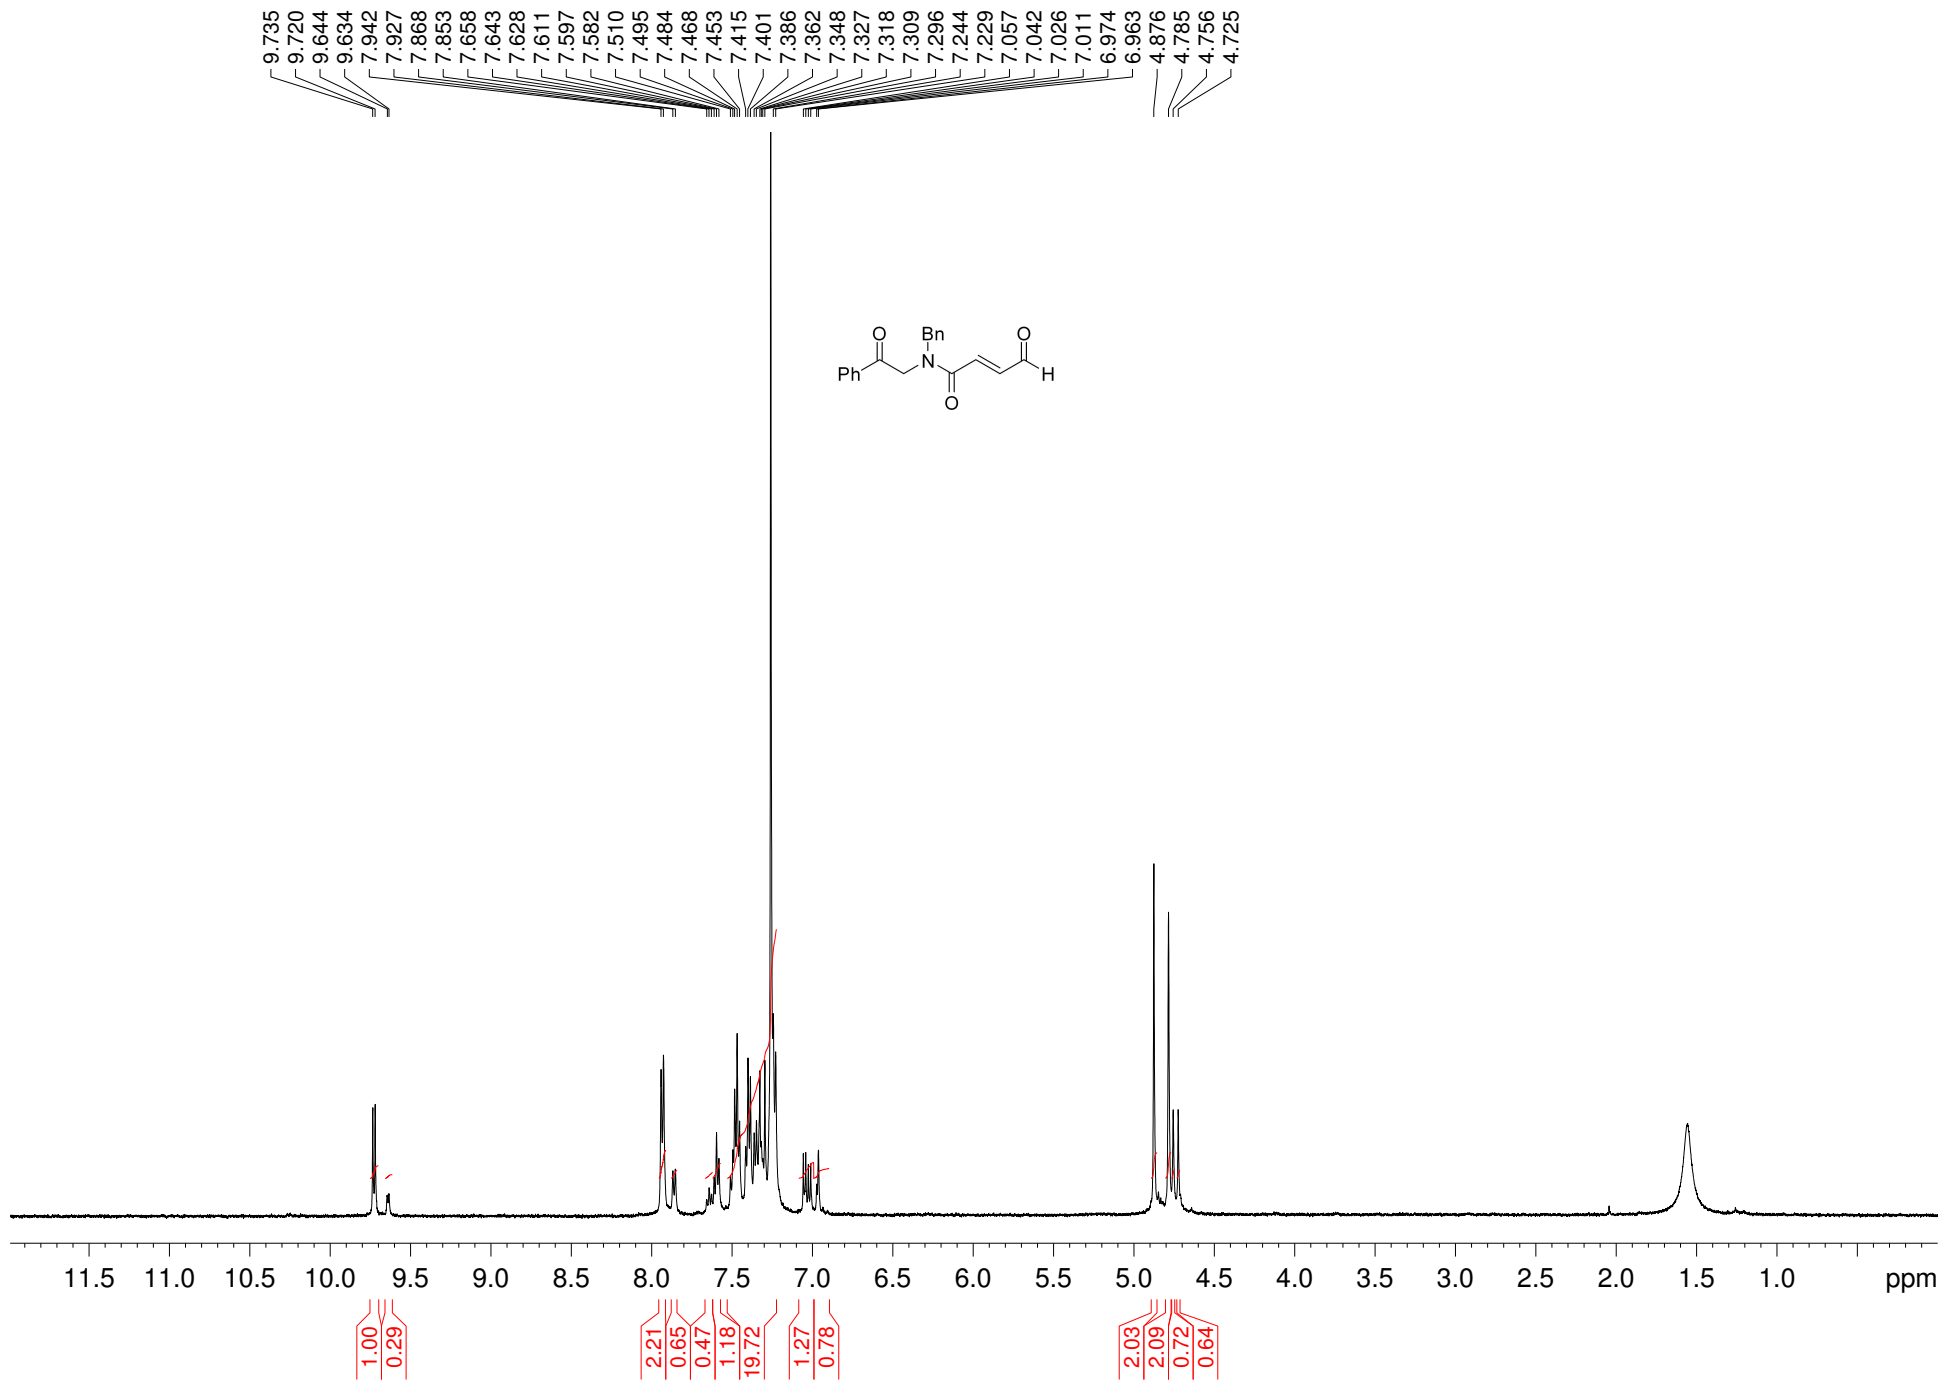

193.427  
192.533

165.824

139.922  
139.725  
139.455  
138.925  
135.722  
135.160  
134.725  
134.157  
129.499  
129.358  
129.138  
129.073  
128.863  
128.571  
128.249  
128.148  
126.943

52.762  
52.220  
50.627

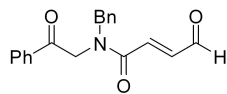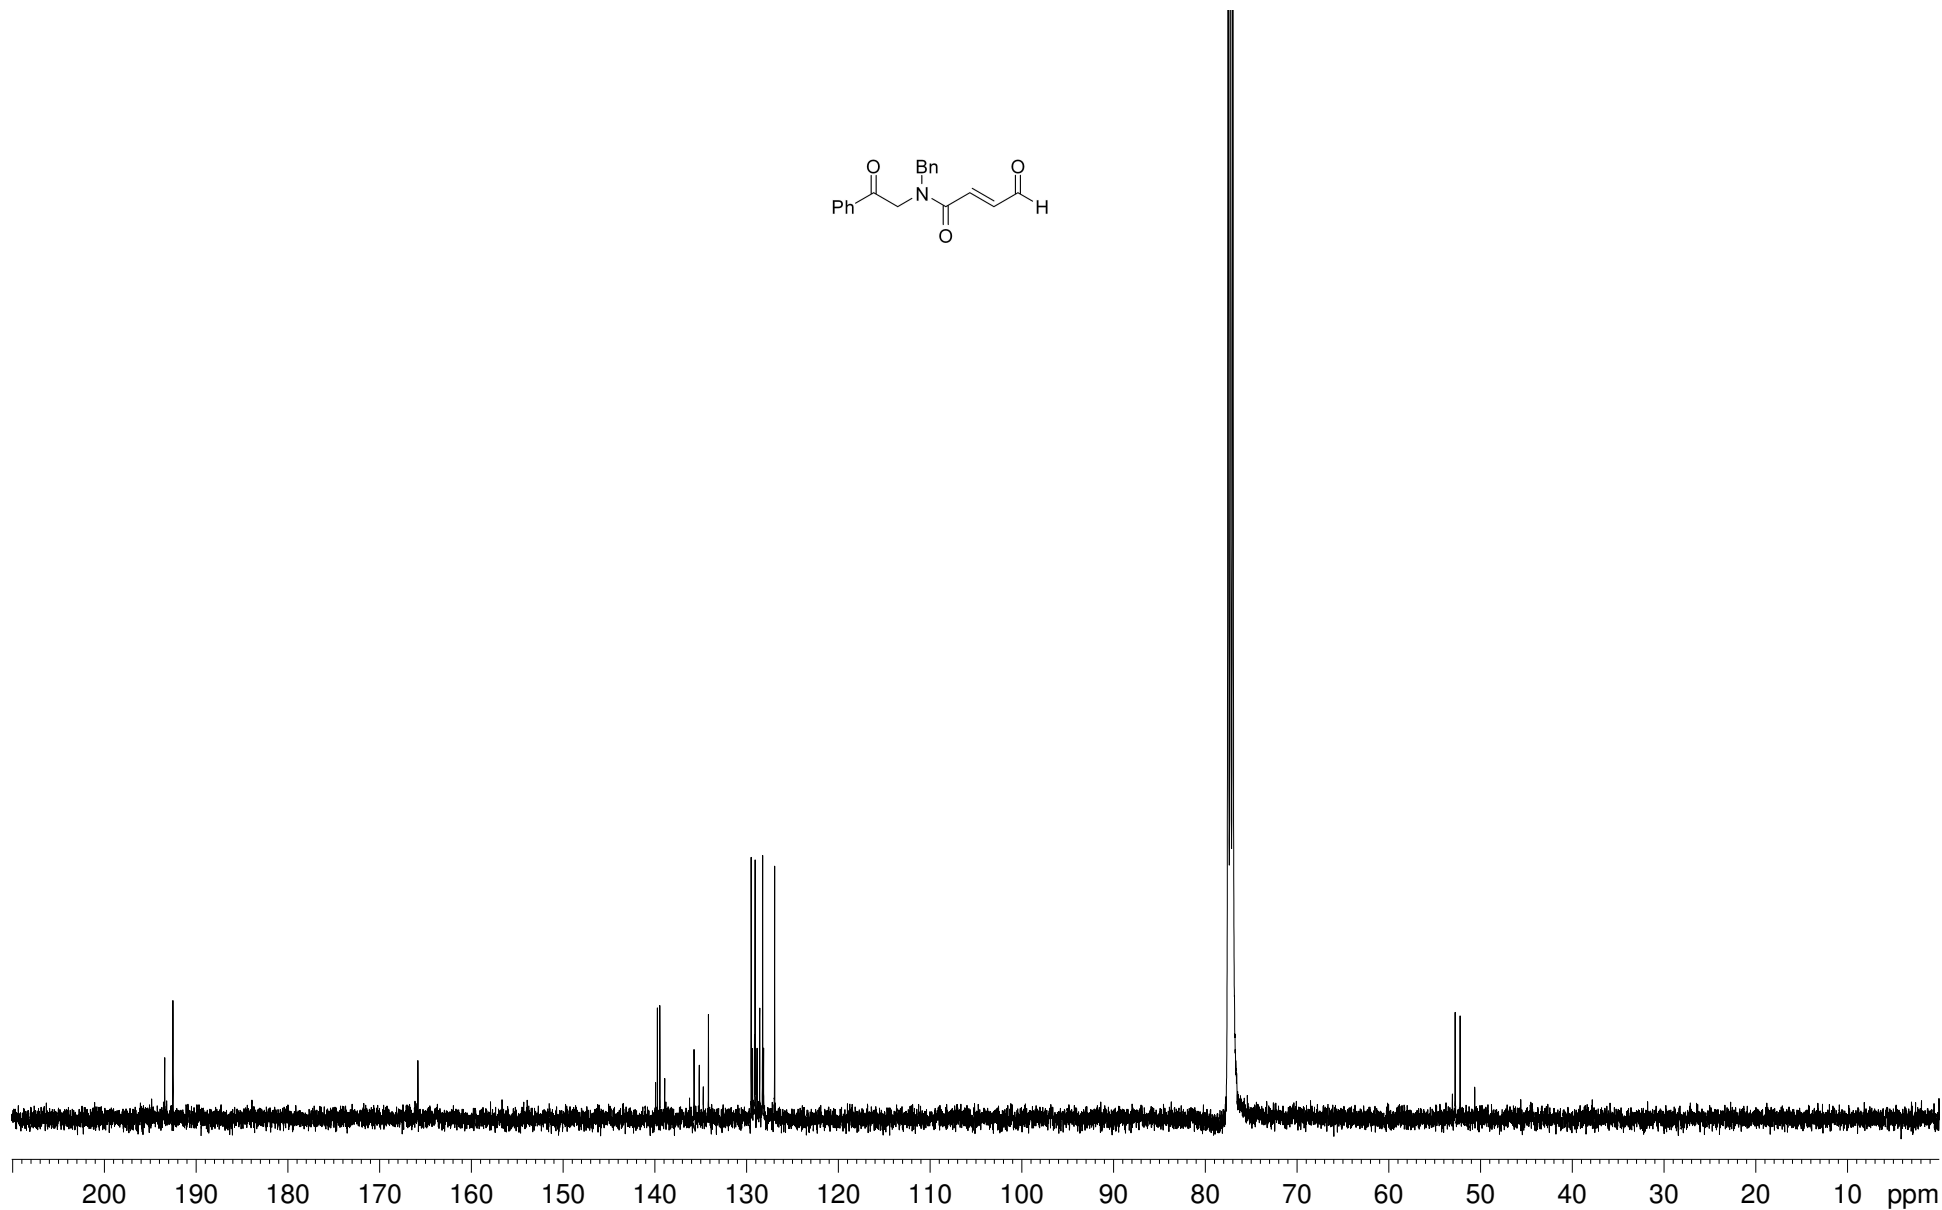

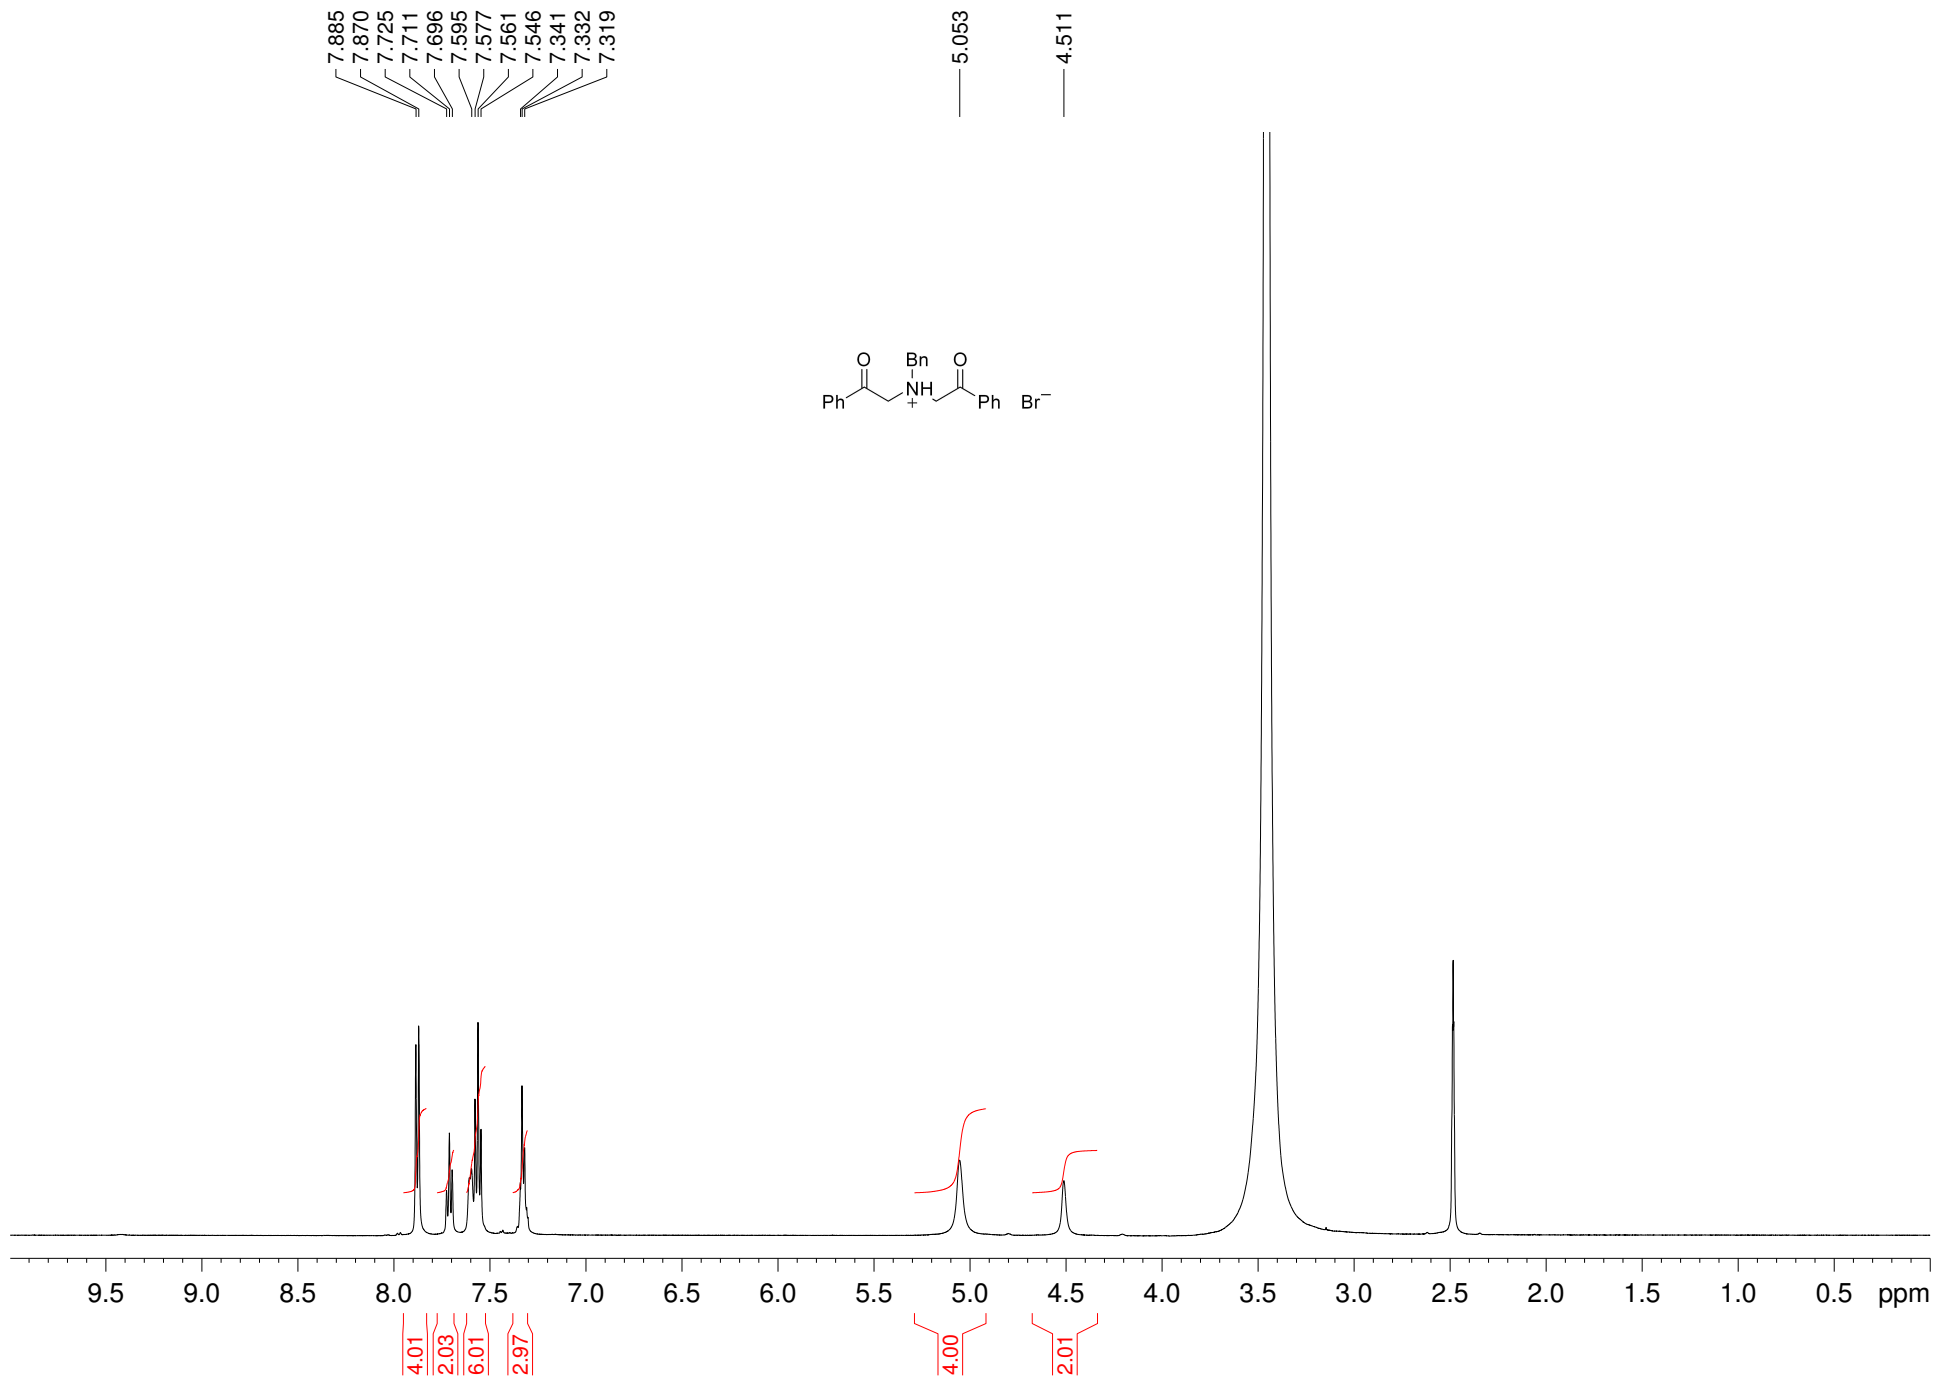

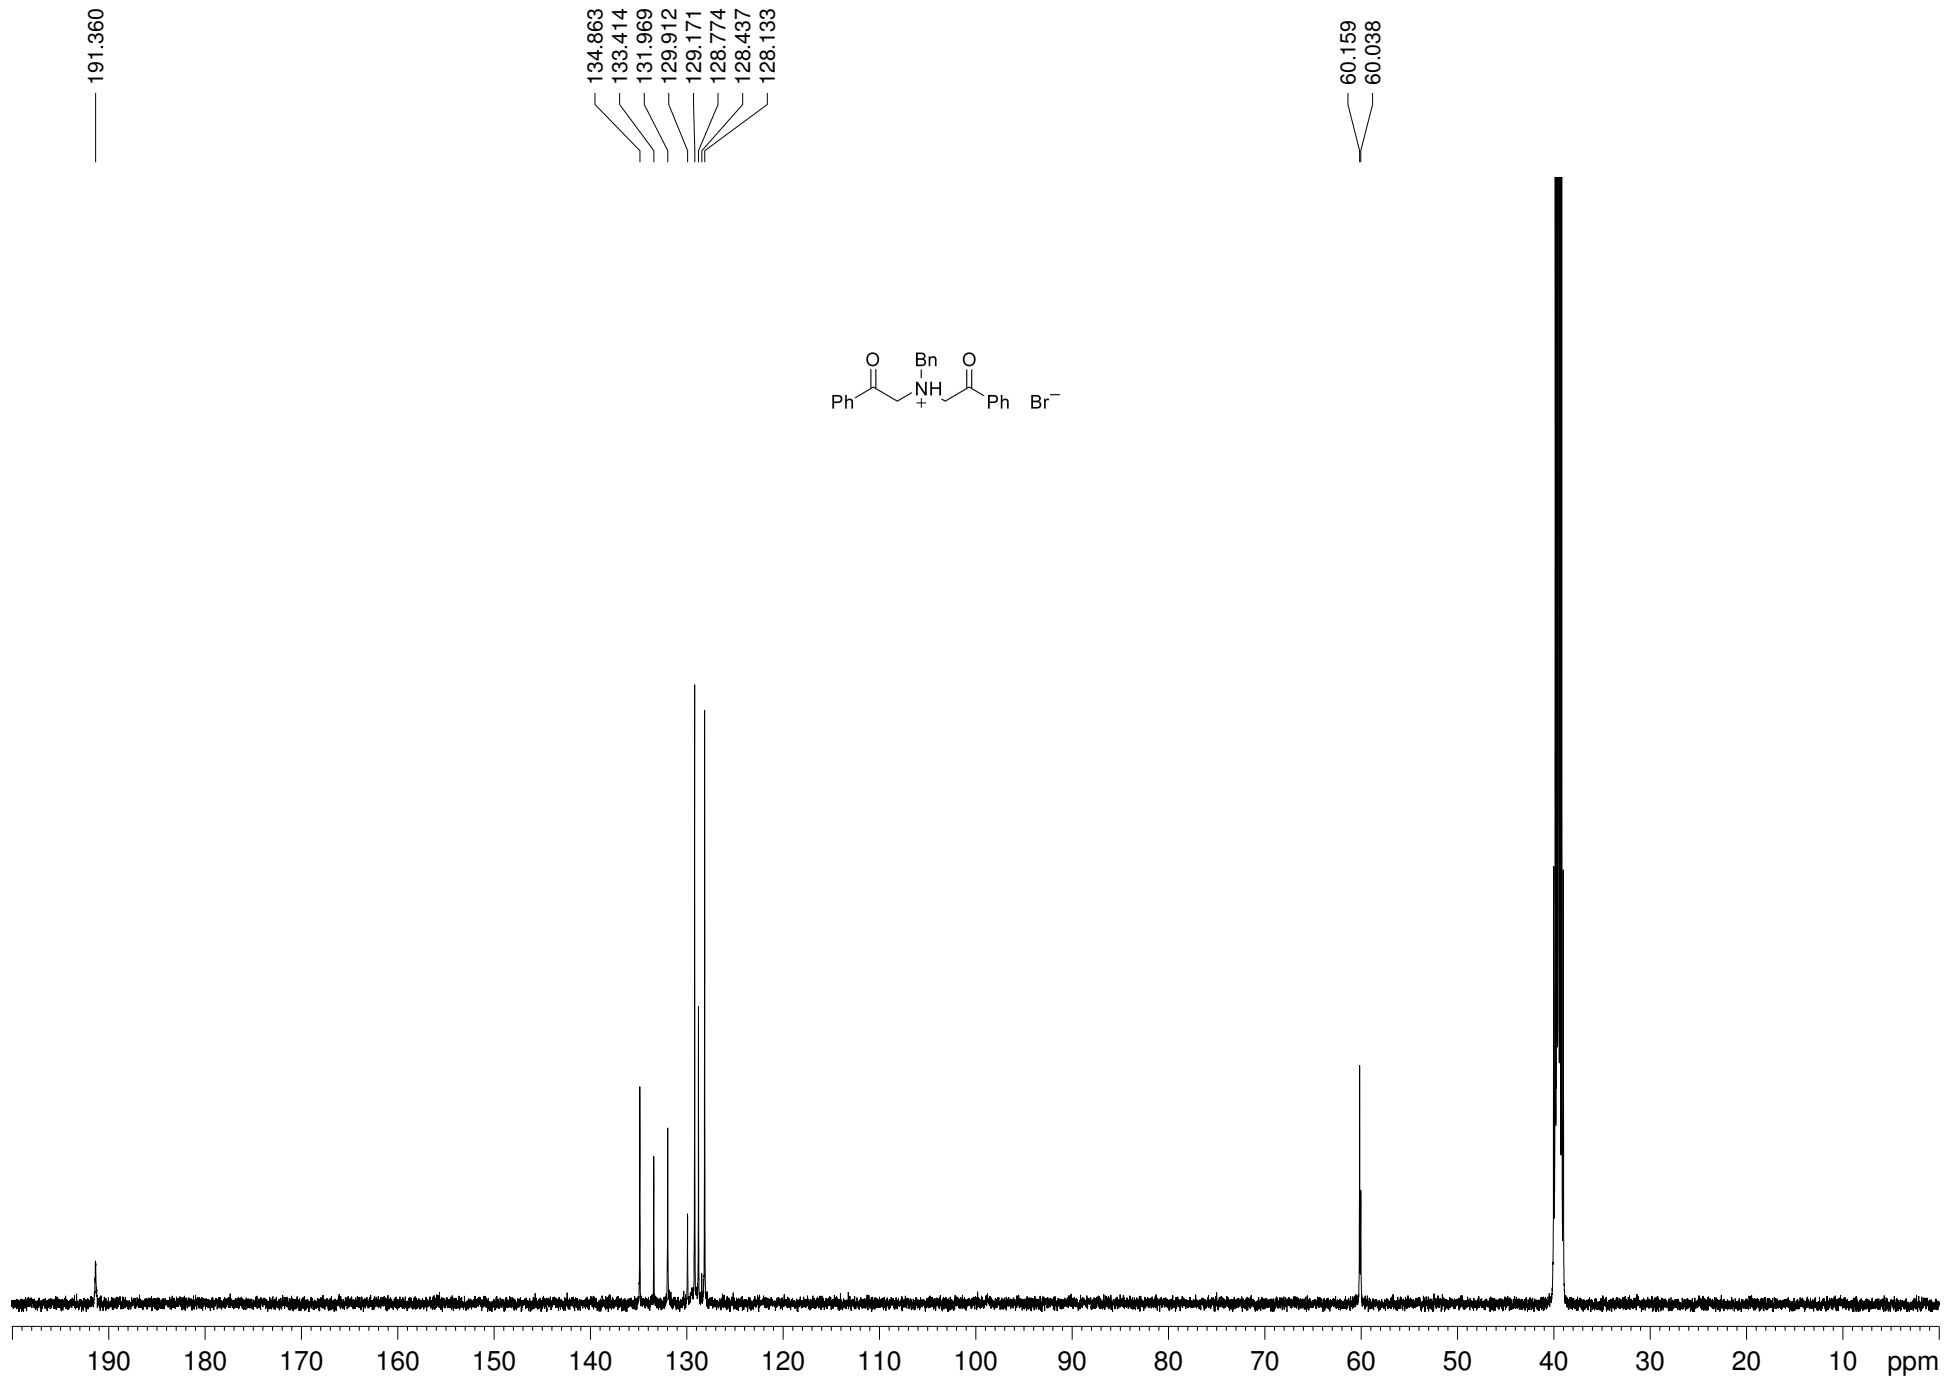



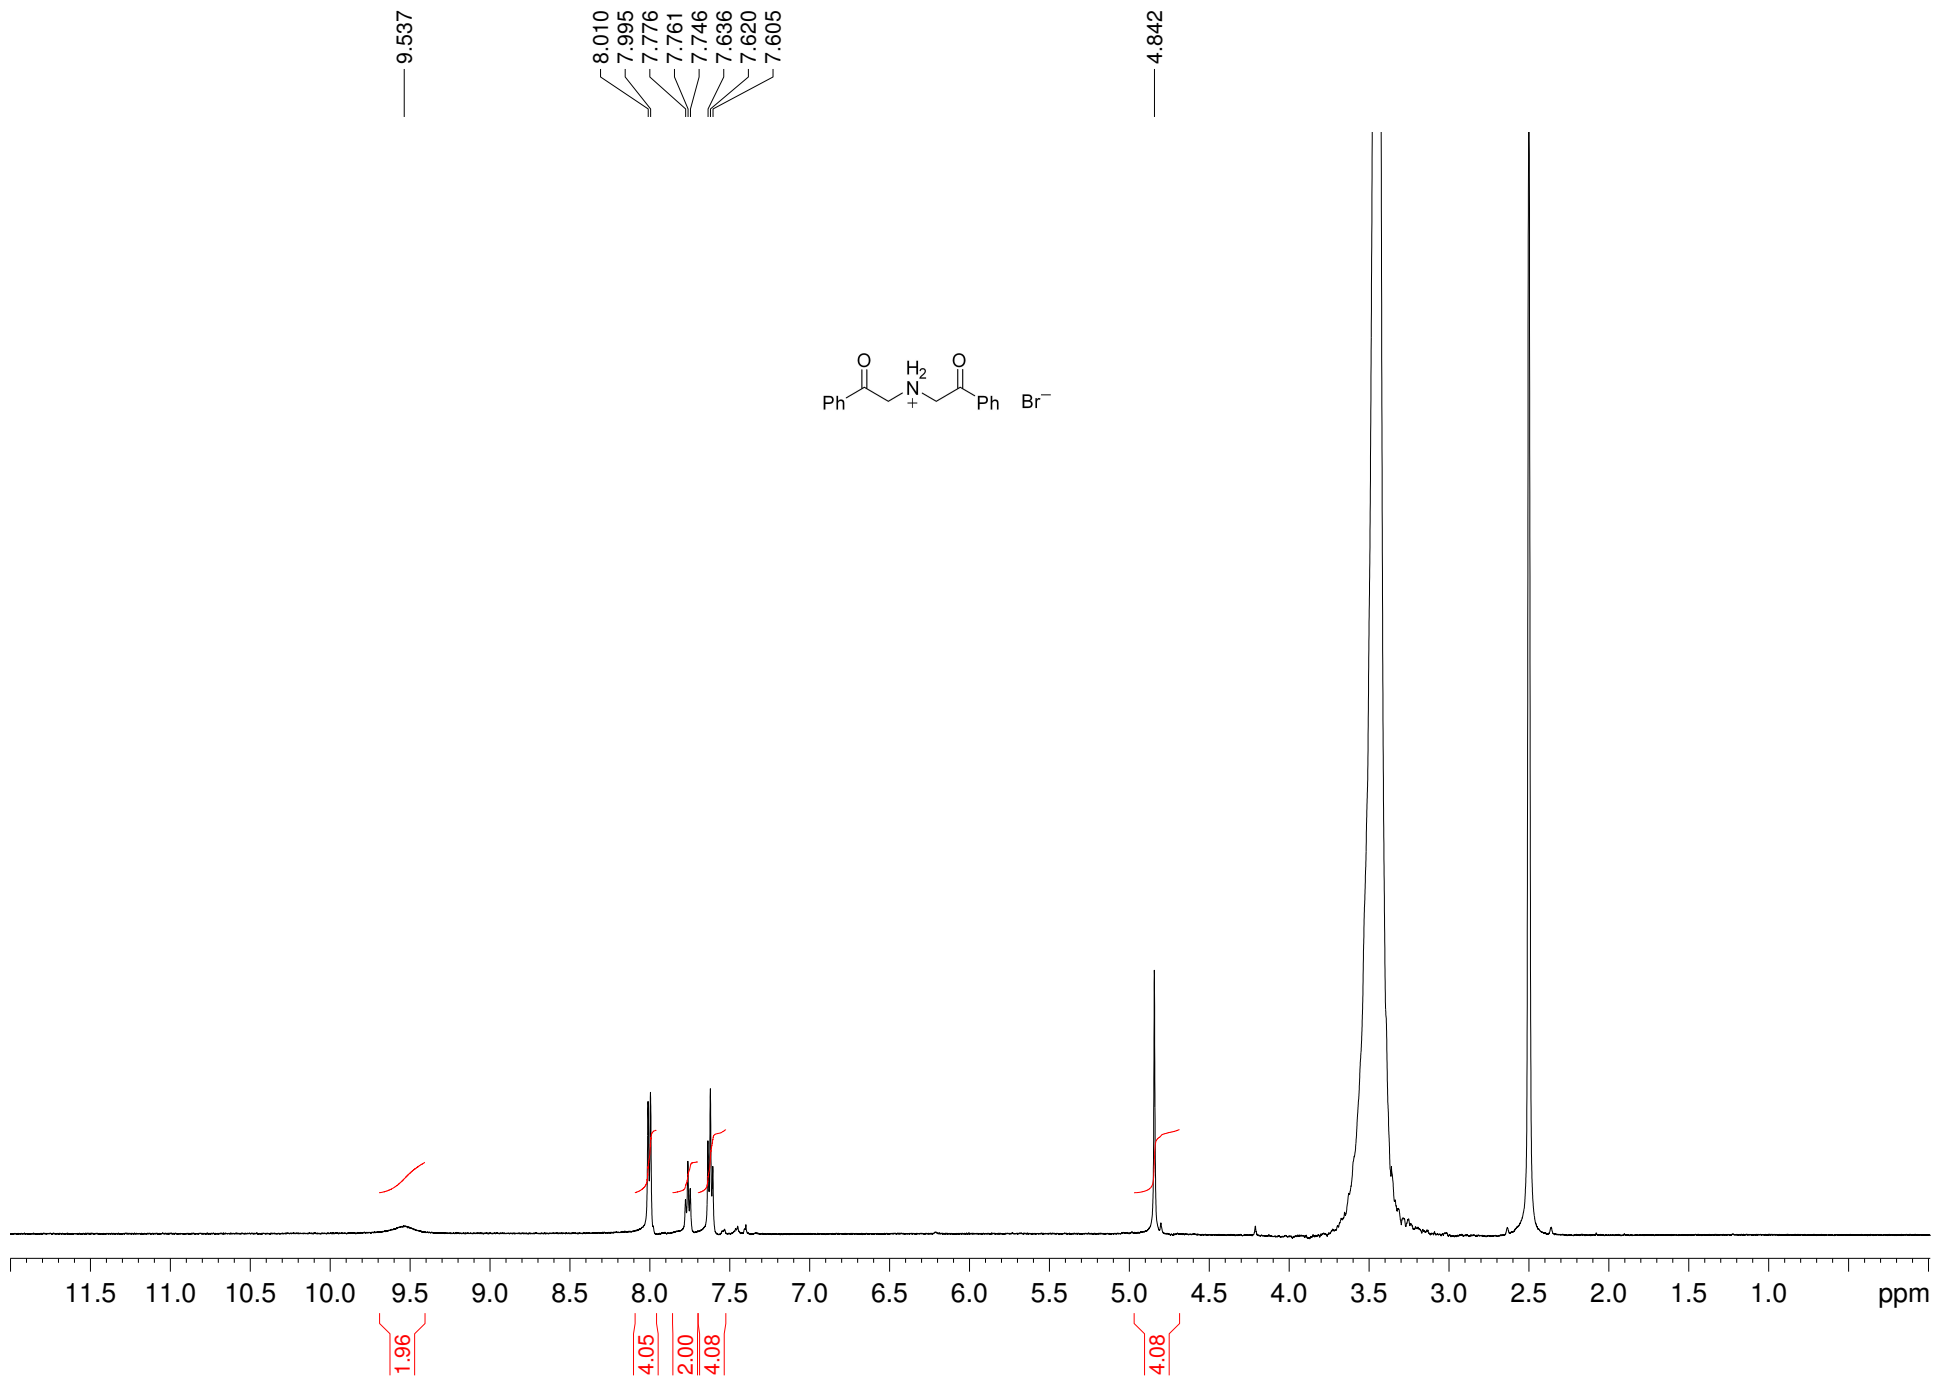

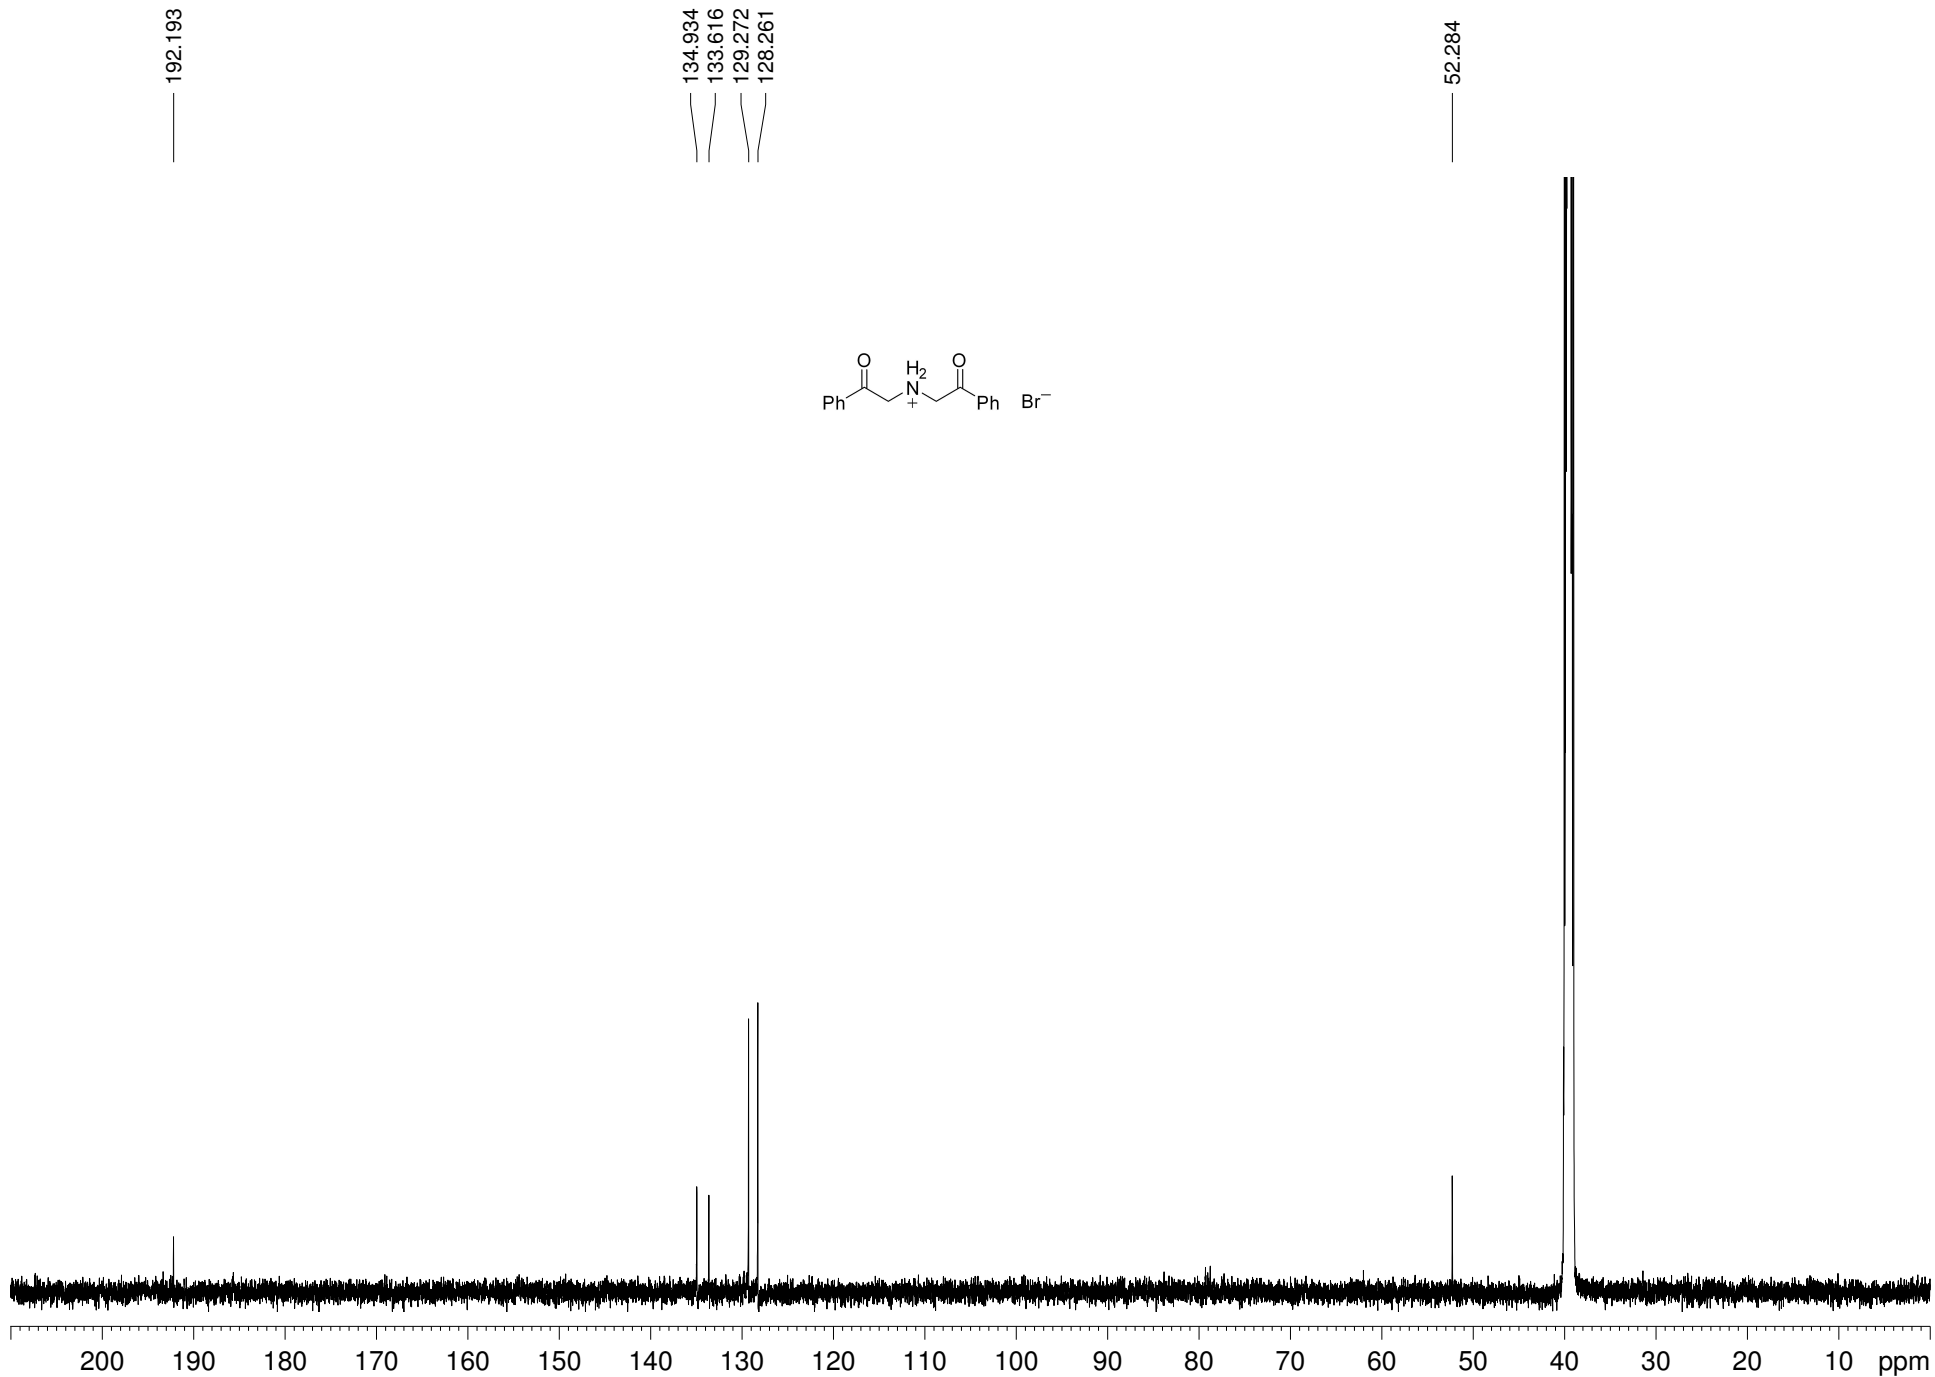

7.970  
7.955  
7.946  
7.930  
7.631  
7.616  
7.601  
7.581  
7.566  
7.552  
7.505  
7.489  
7.473  
7.463  
7.448  
7.433  
6.755  
6.748  
6.725  
6.717  
6.393  
6.363

5.012  
4.999  
4.992

3.573  
3.559  
3.554  
3.540  
3.526  
3.462  
3.448  
3.434  
3.429  
3.415

1.119  
1.105  
1.091

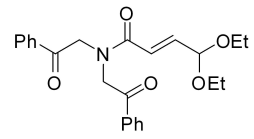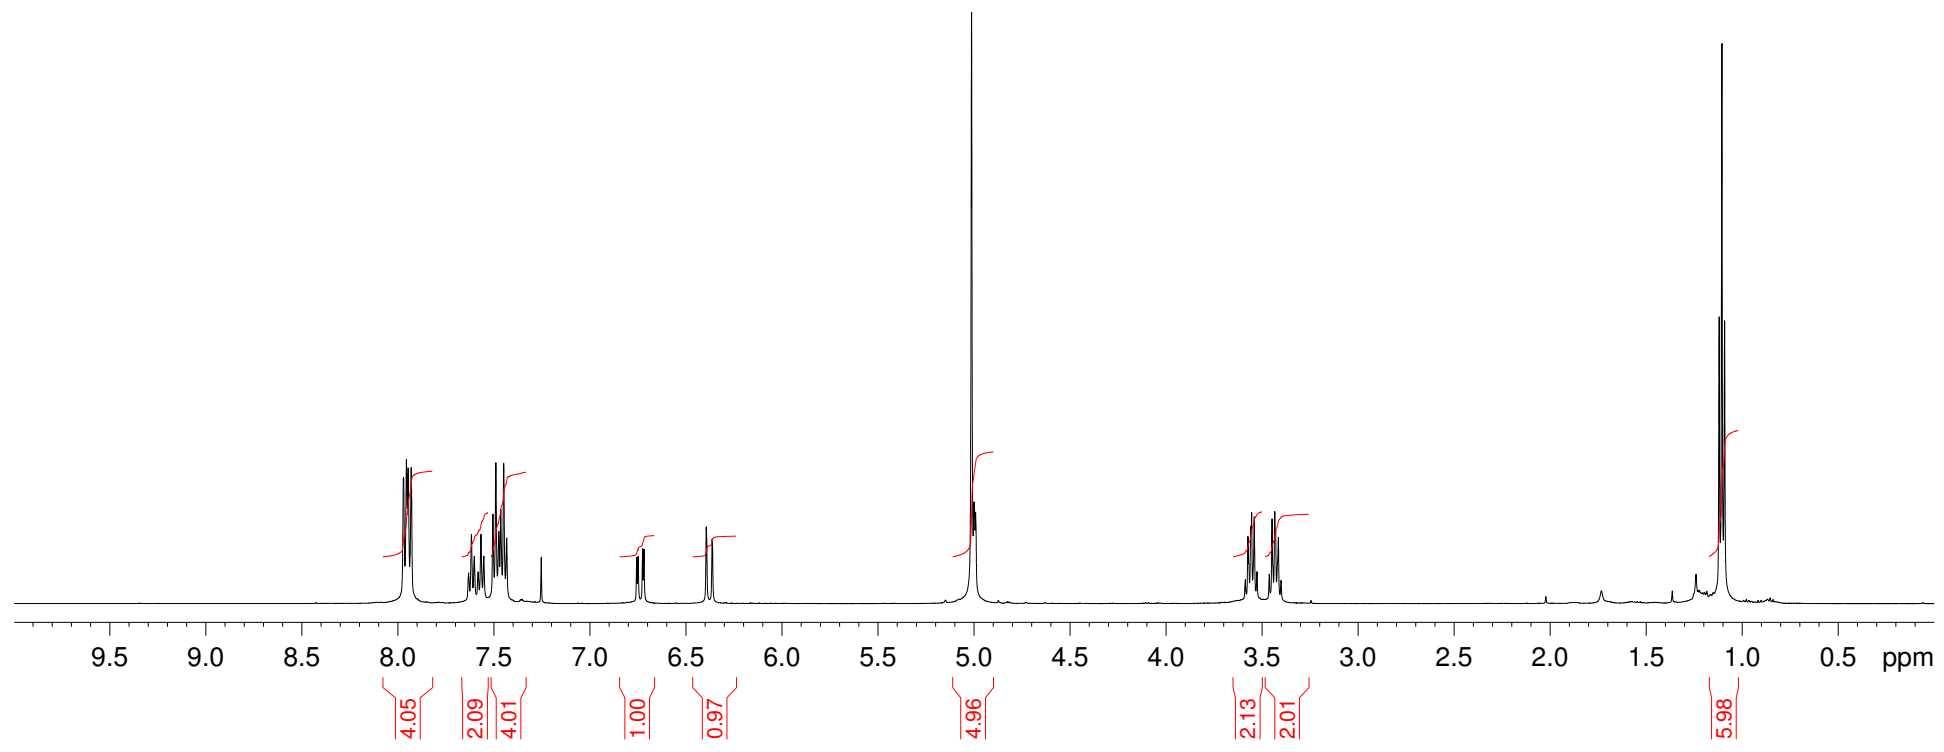

194.894  
194.014

167.213

142.128  
135.147  
134.653  
134.309  
133.889  
129.123  
128.880  
128.178  
127.993  
122.406

99.189

61.249

54.902  
52.935

15.232

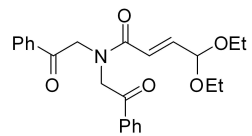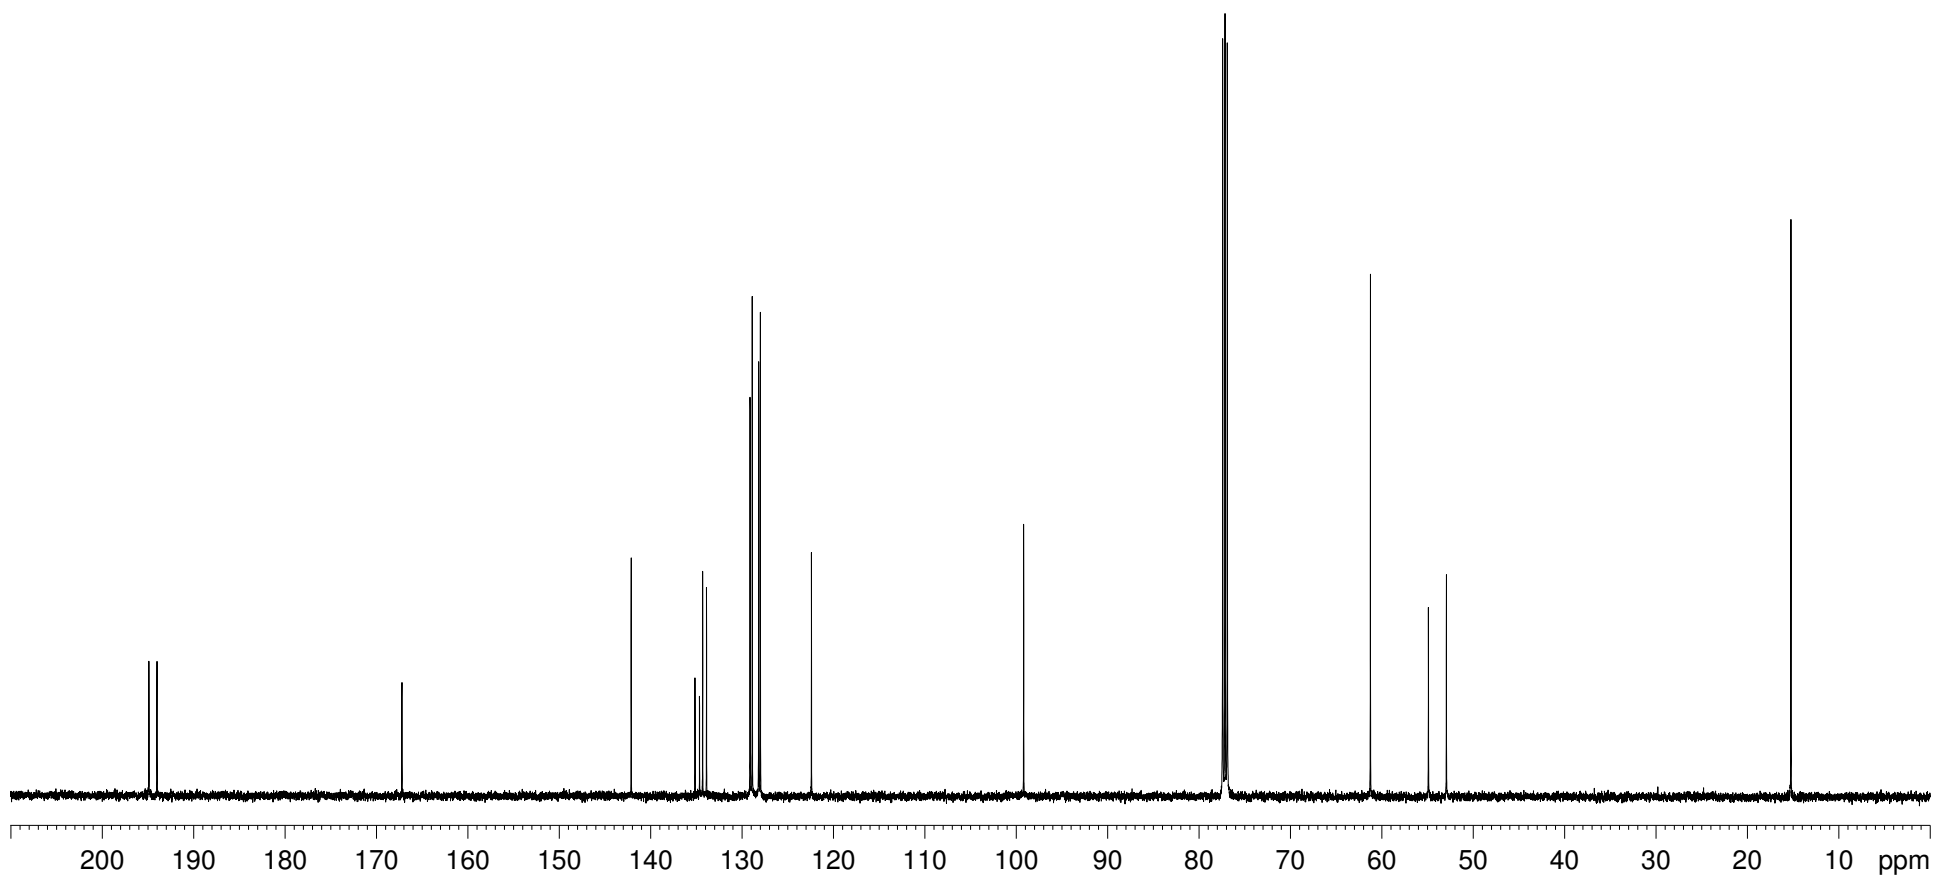

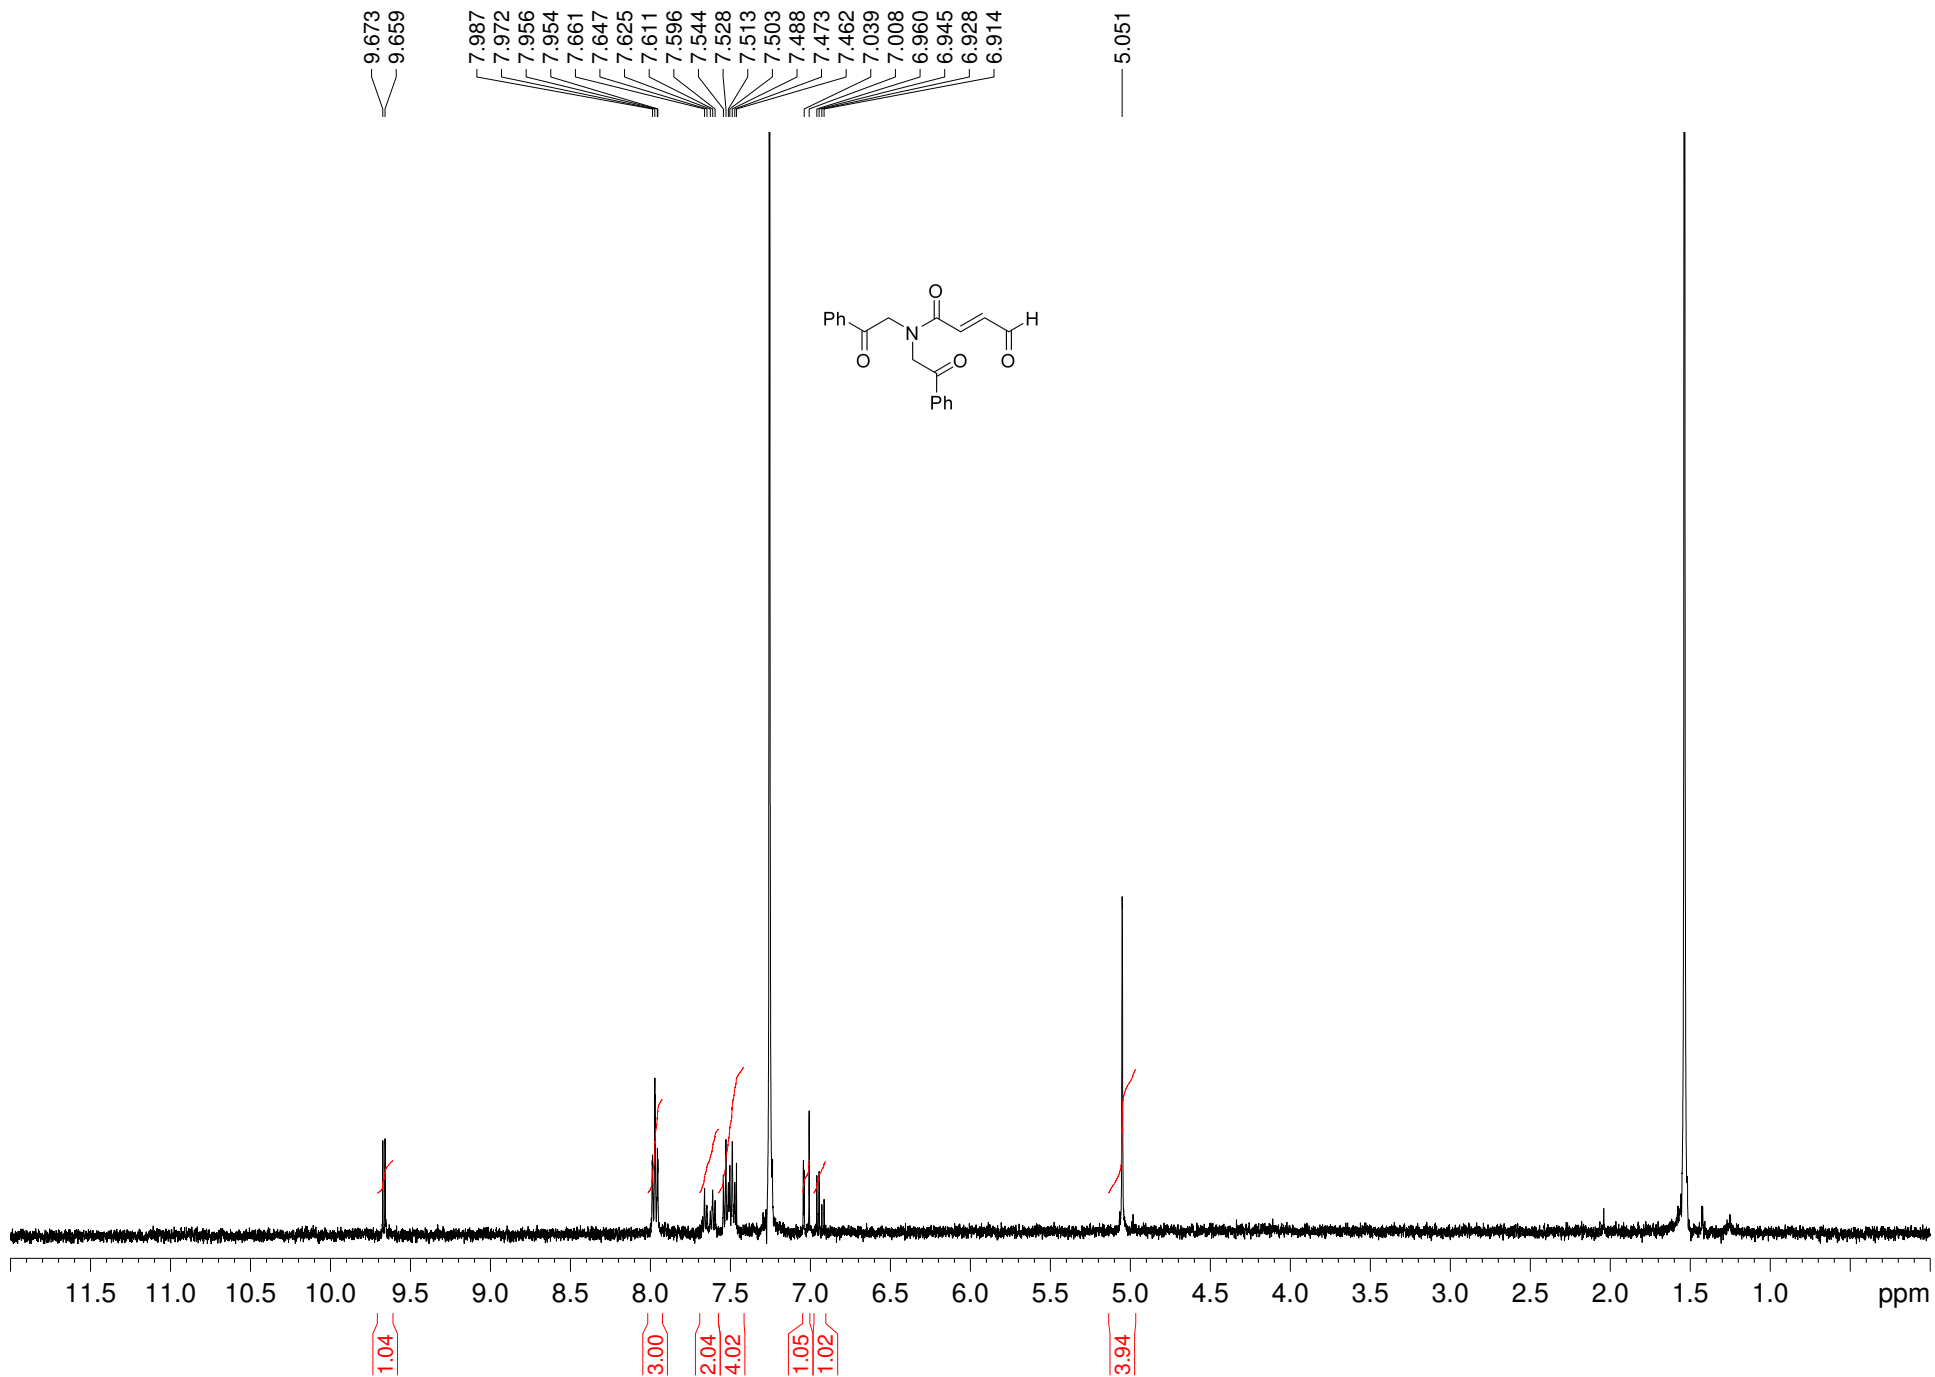

194.135  
193.327  
192.375

166.043

139.008  
136.100  
134.807  
134.657  
134.190  
134.135  
129.229  
128.955  
128.125  
128.073

55.056  
53.149

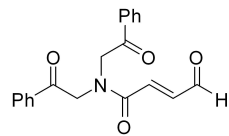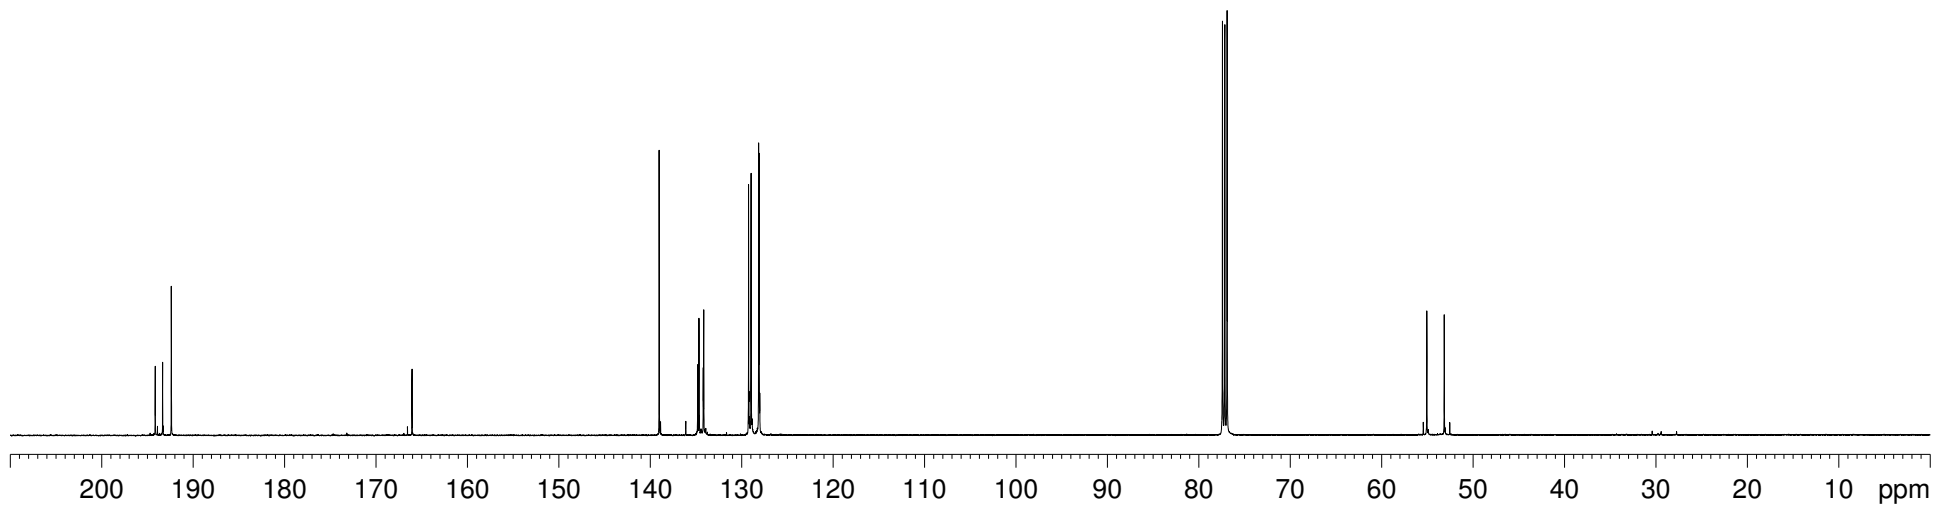

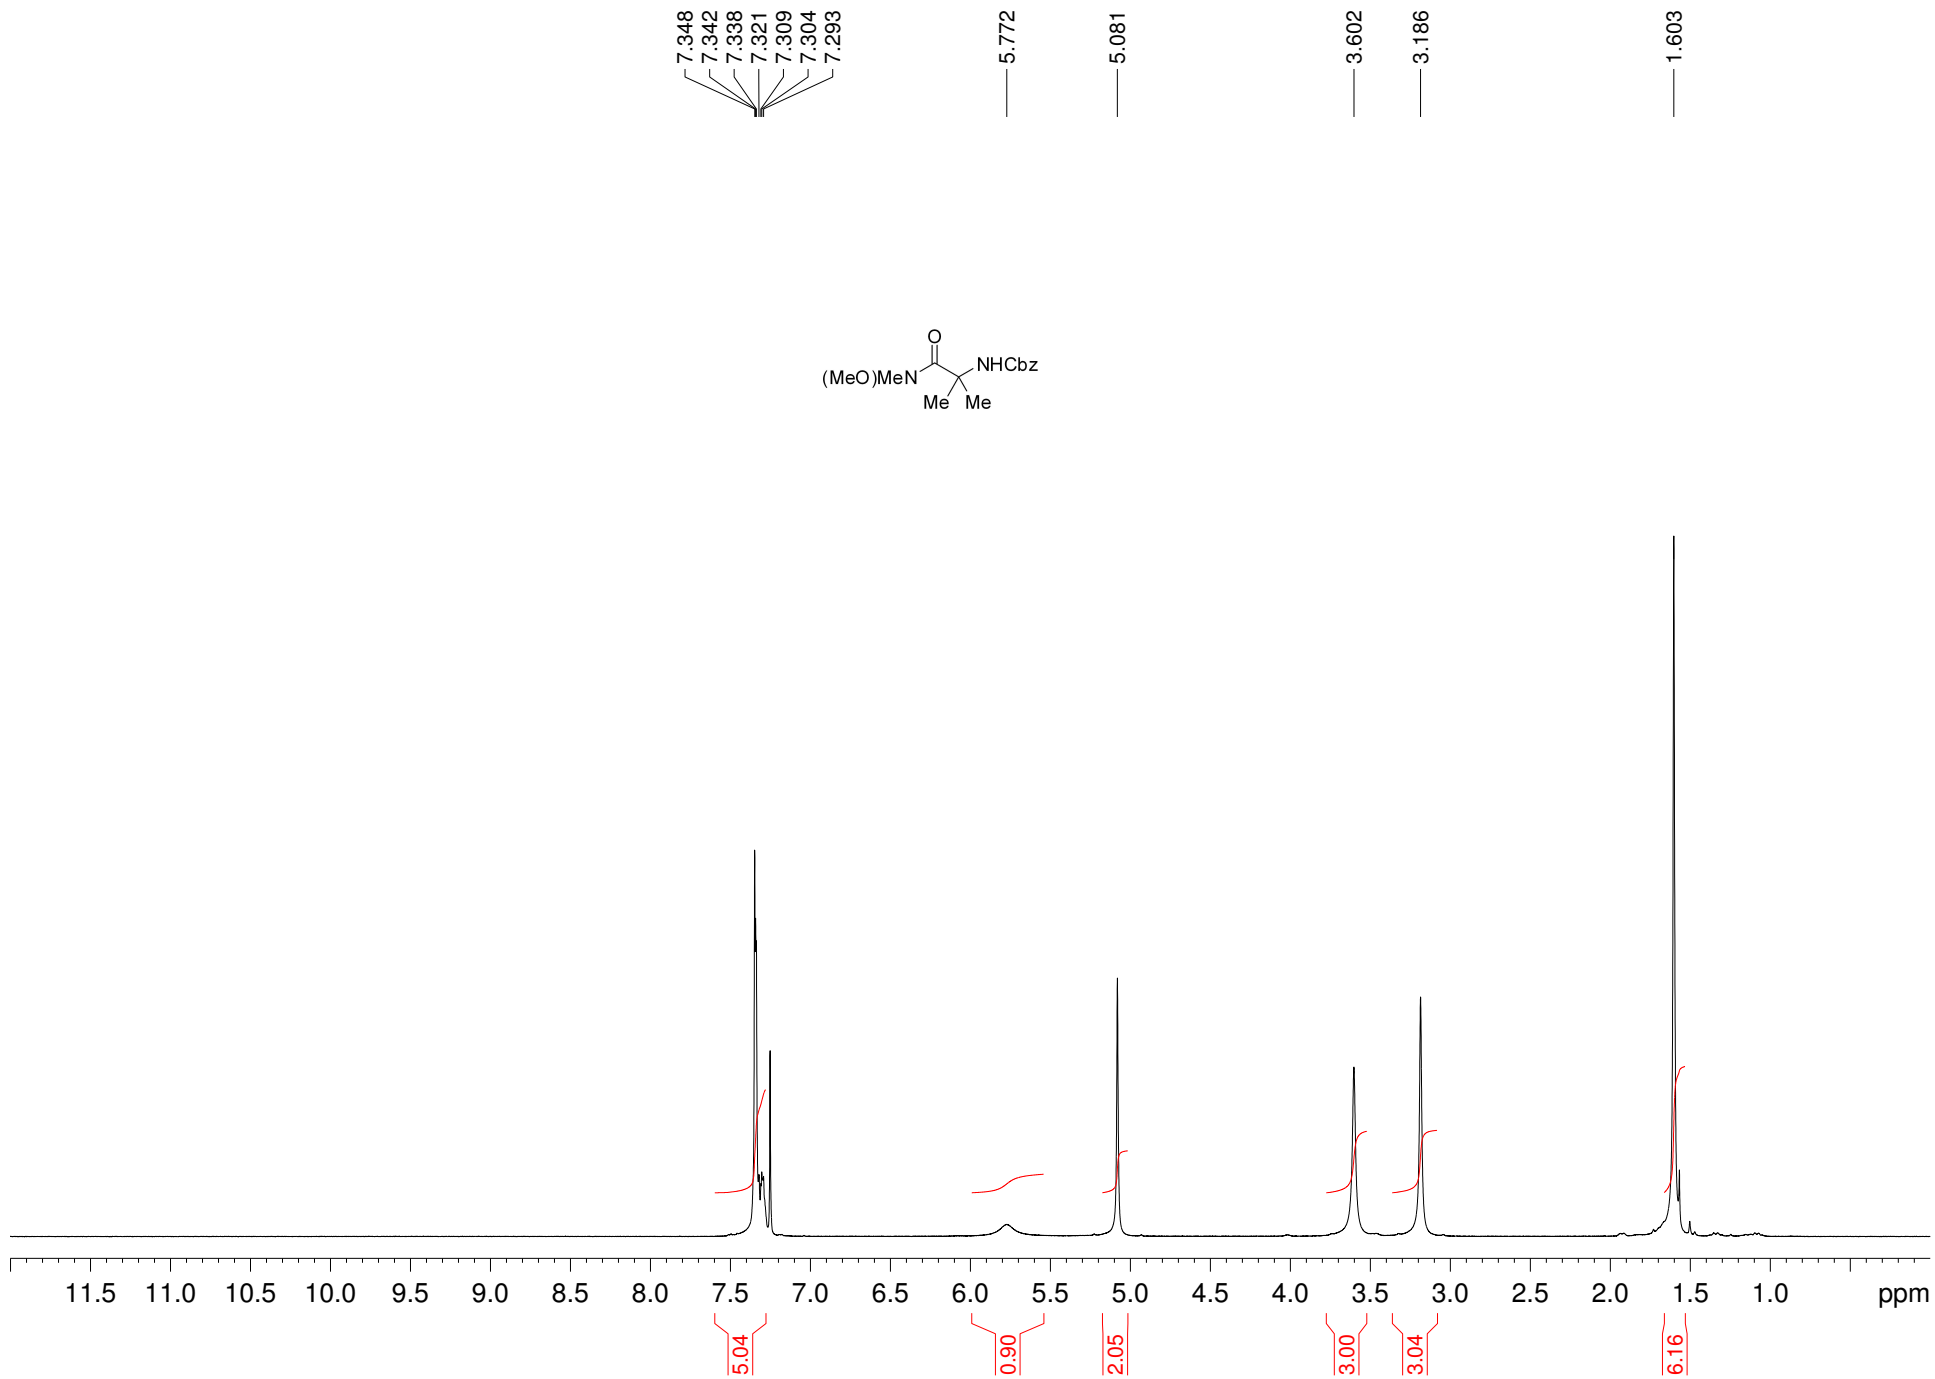

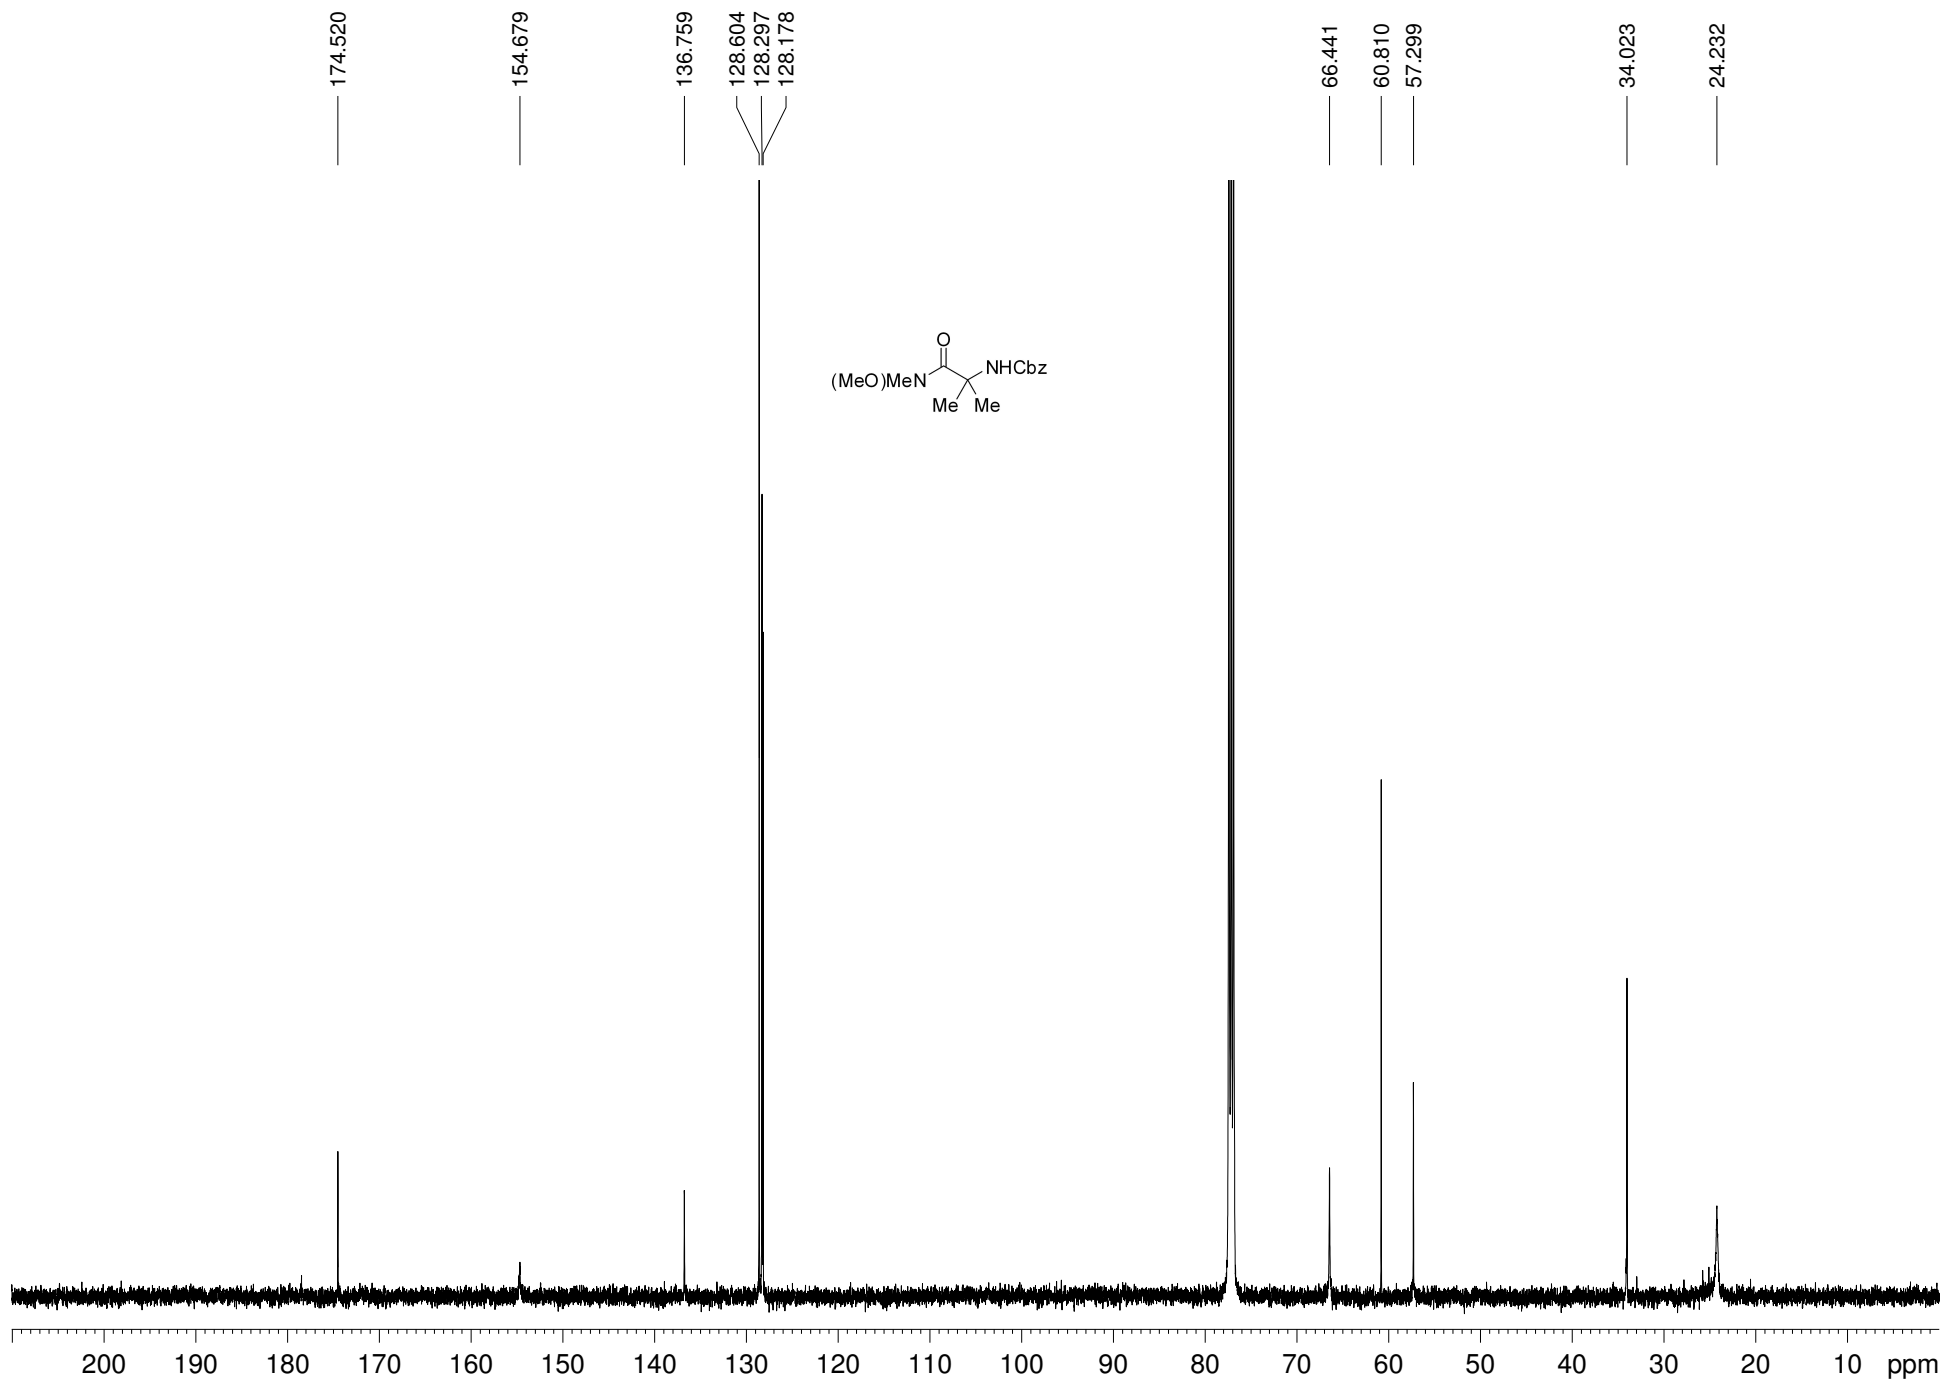



7.304  
7.290  
7.260  
7.243

5.218

4.682

3.385

3.114

1.435

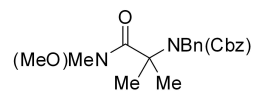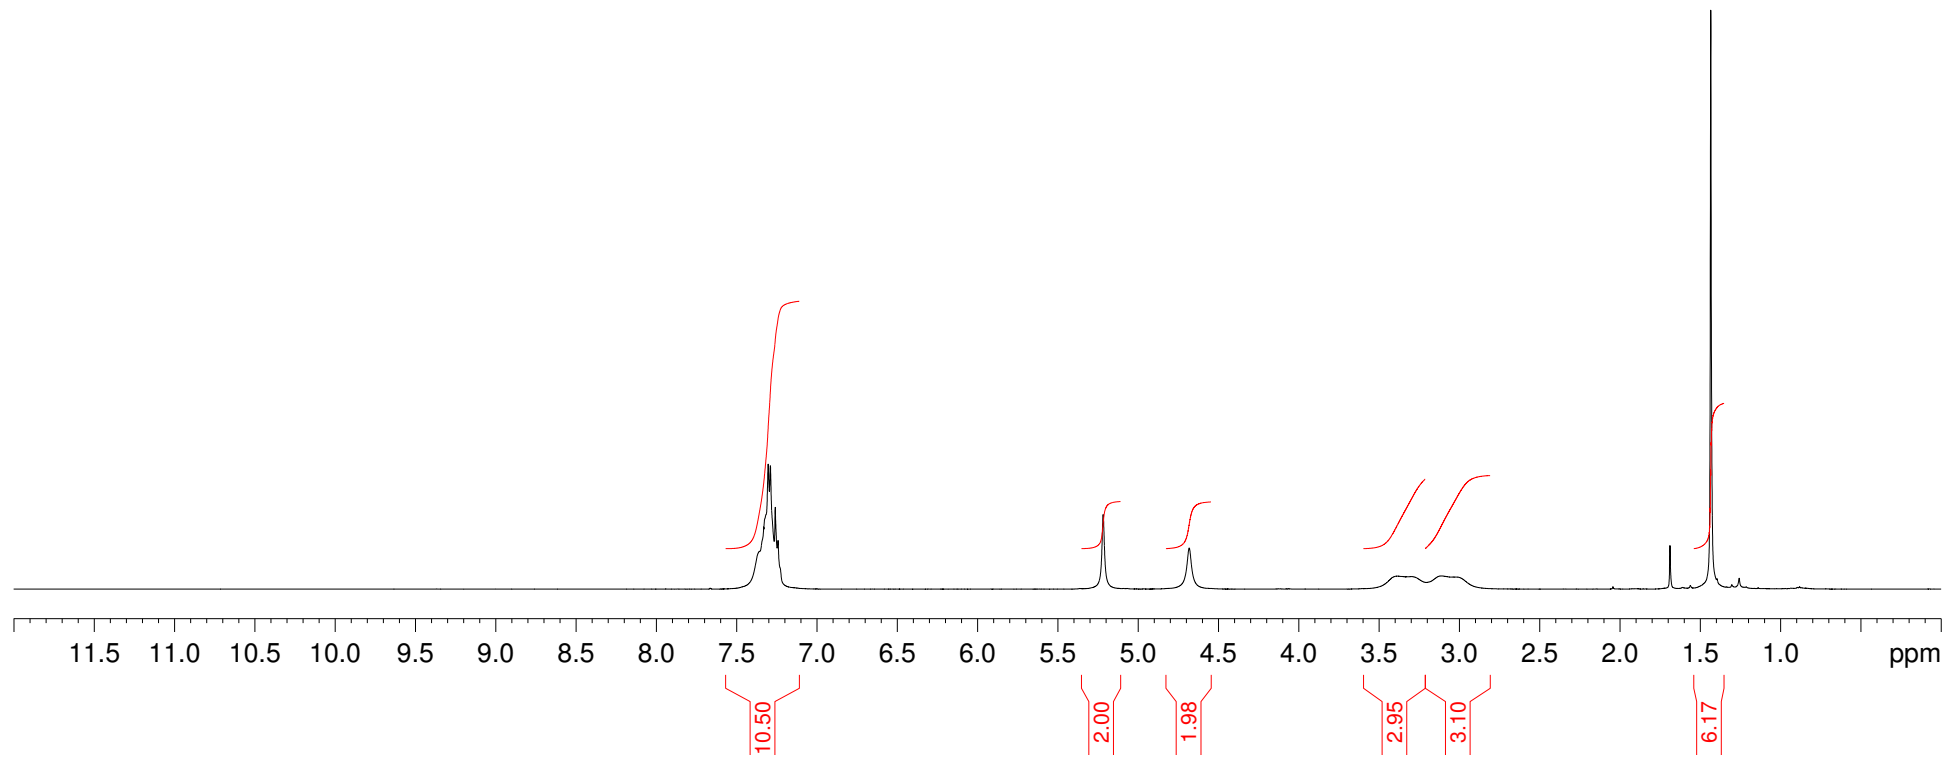

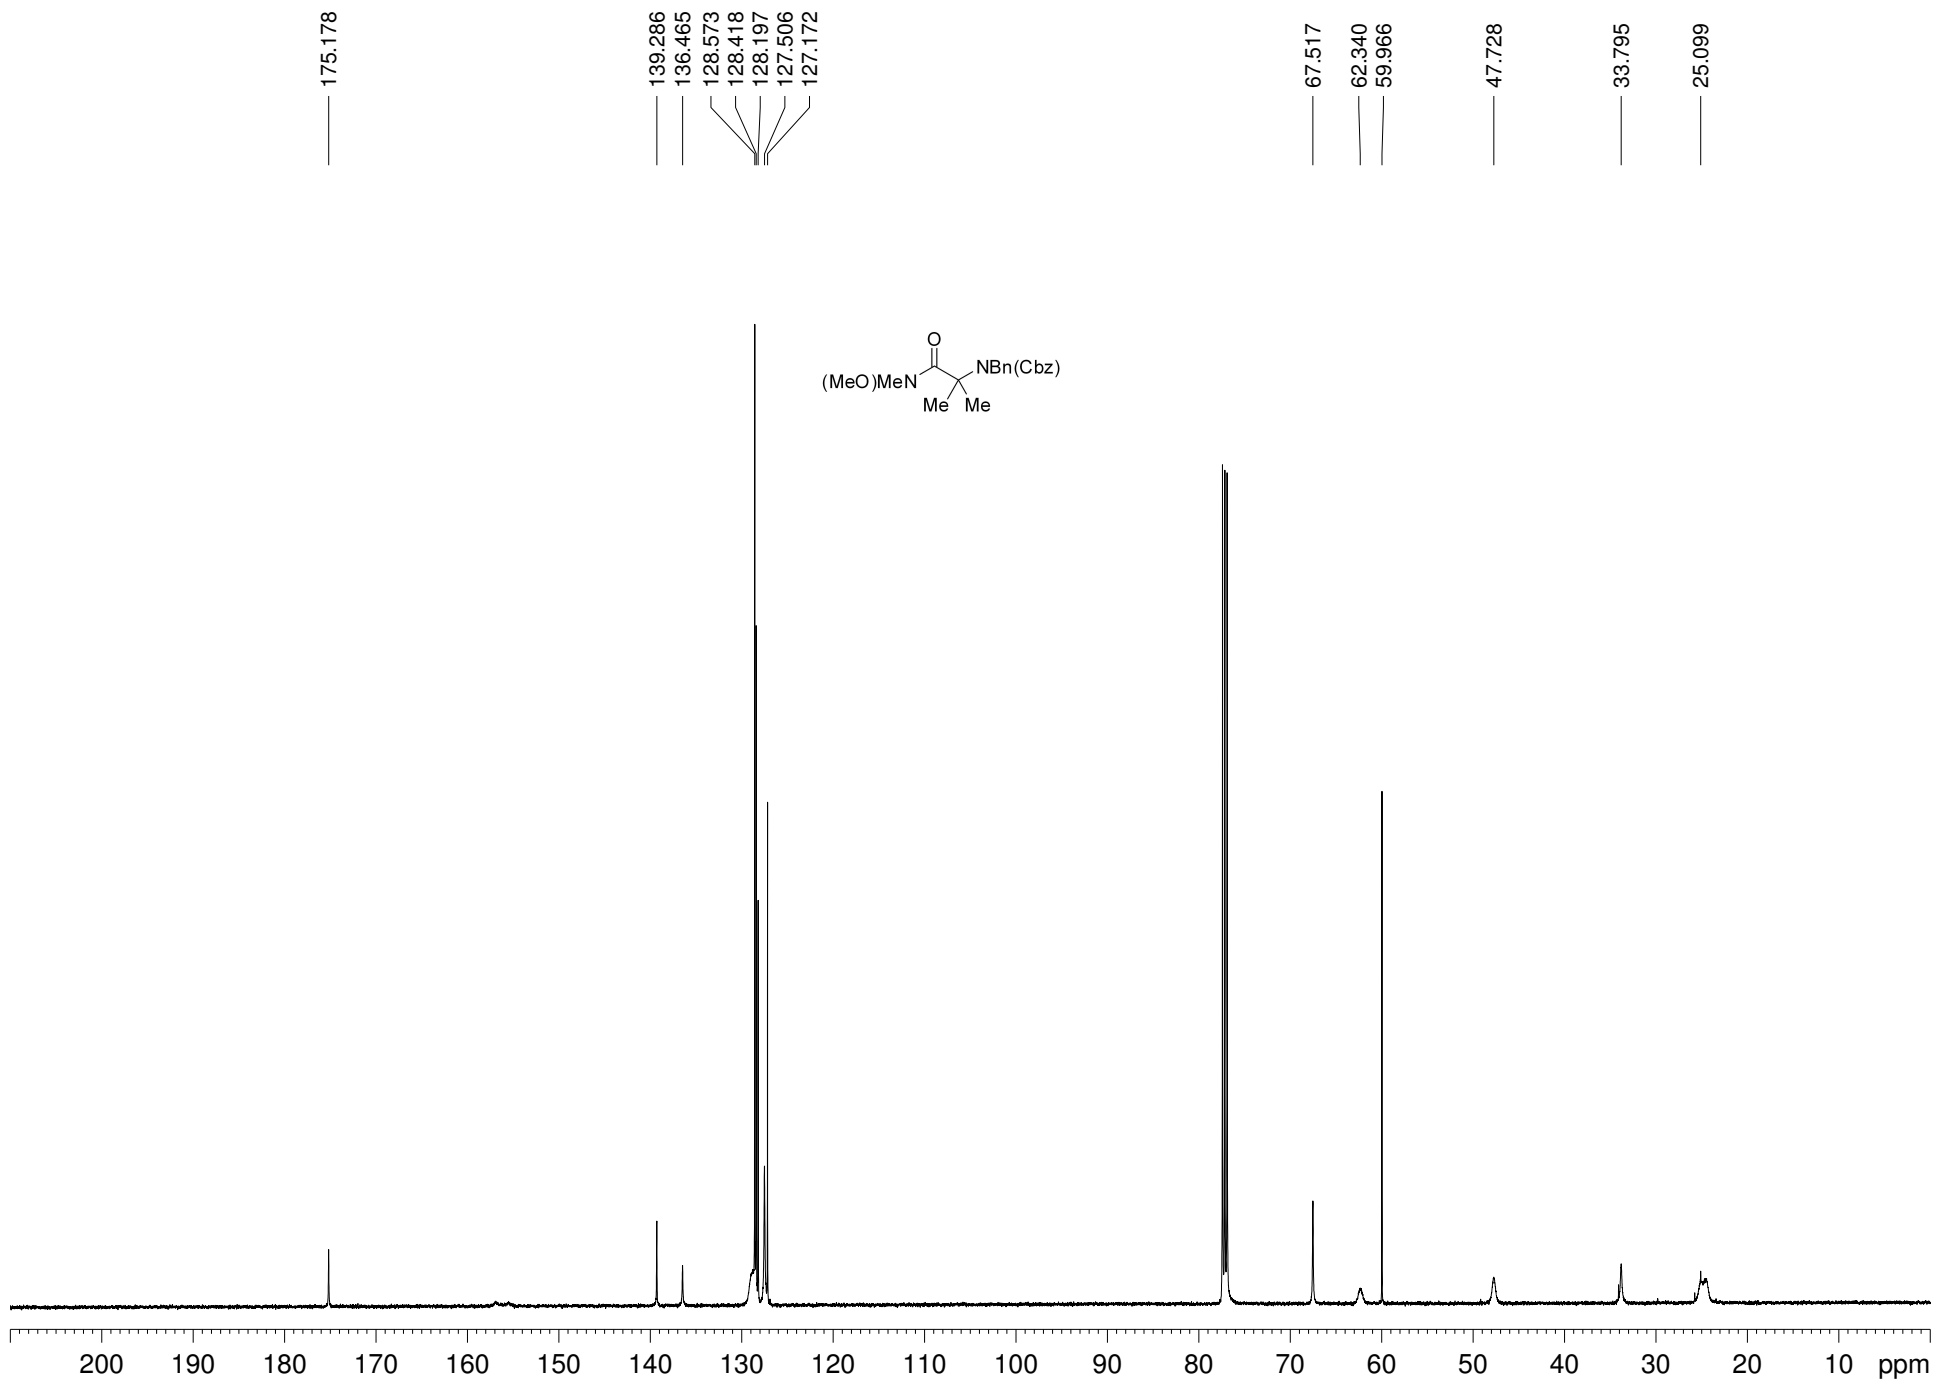

7.296  
7.282  
7.252  
7.241

5.164

4.635

2.053

1.265

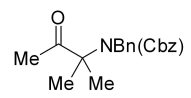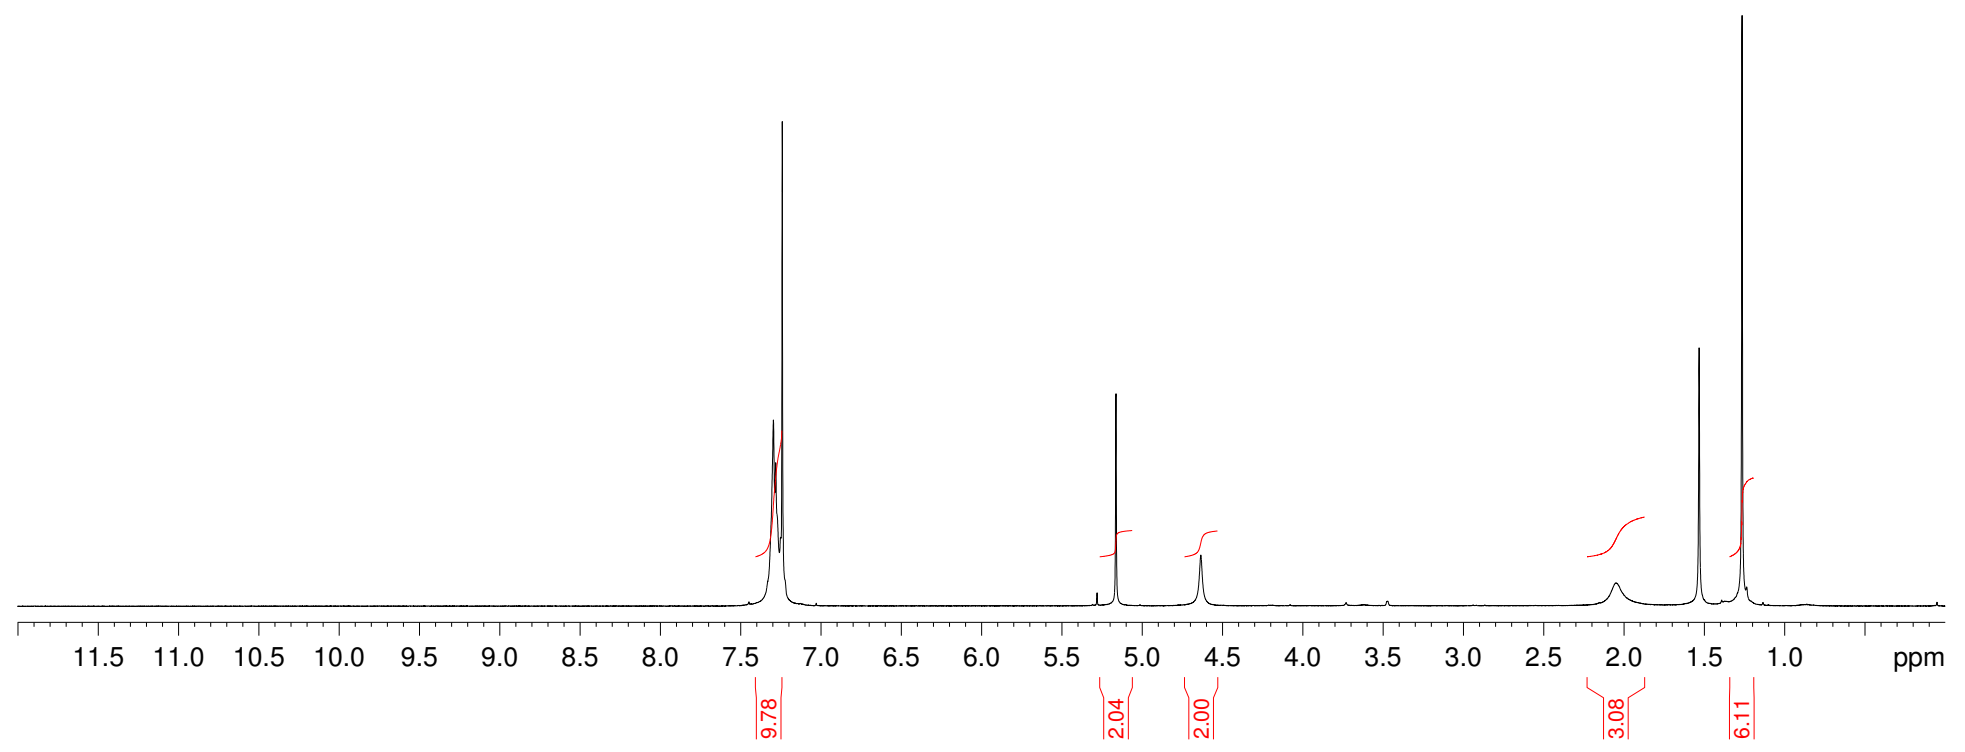

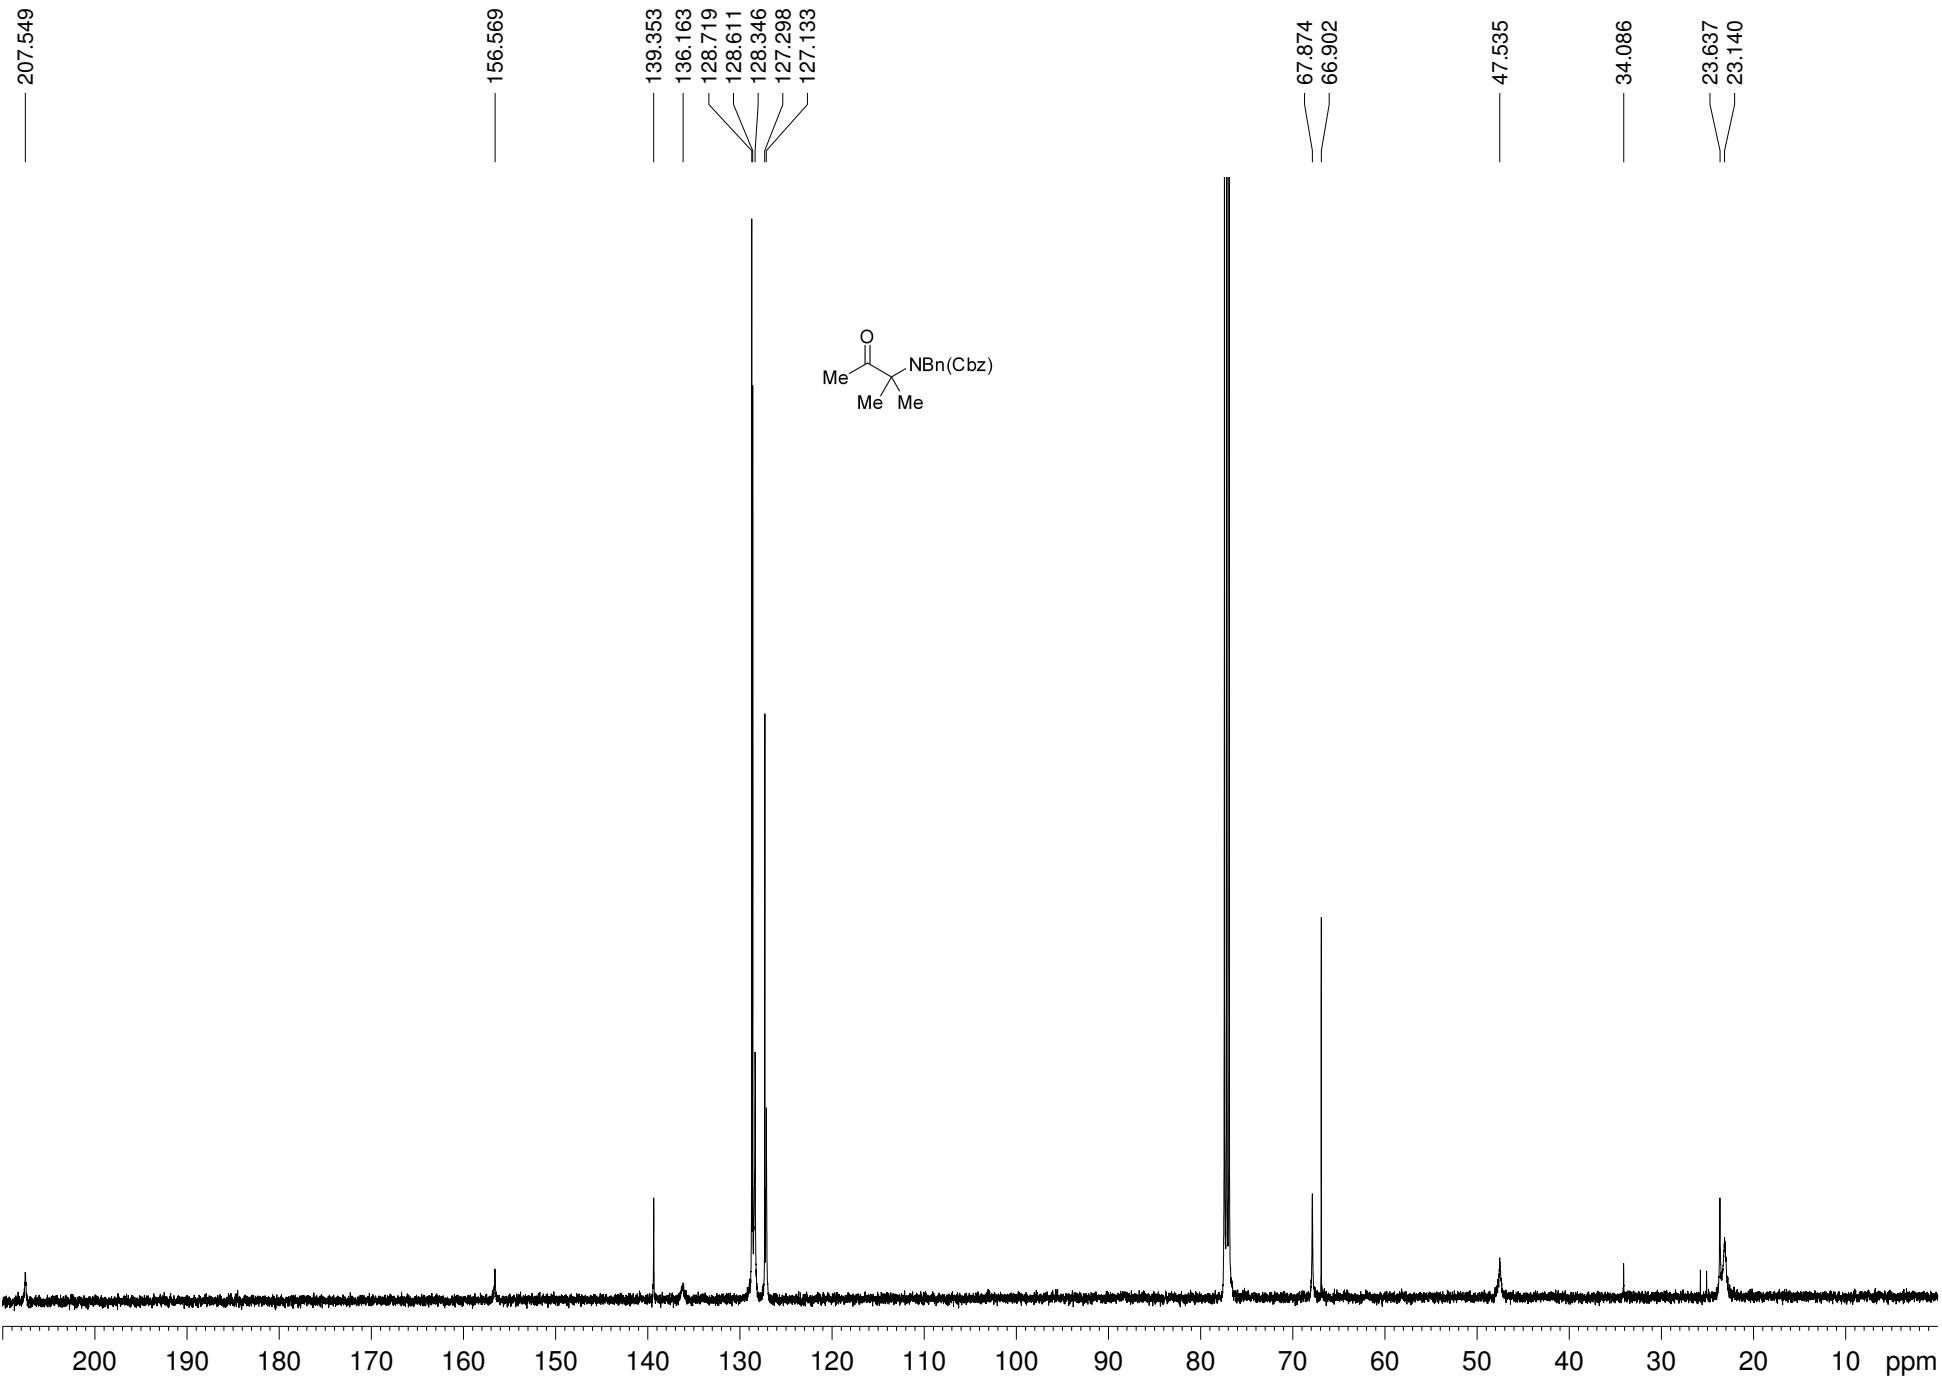

7.648  
7.634  
7.350  
7.336  
7.321  
7.311  
7.297

3.867  
3.855  
3.844

2.182

1.541

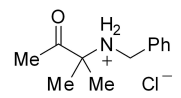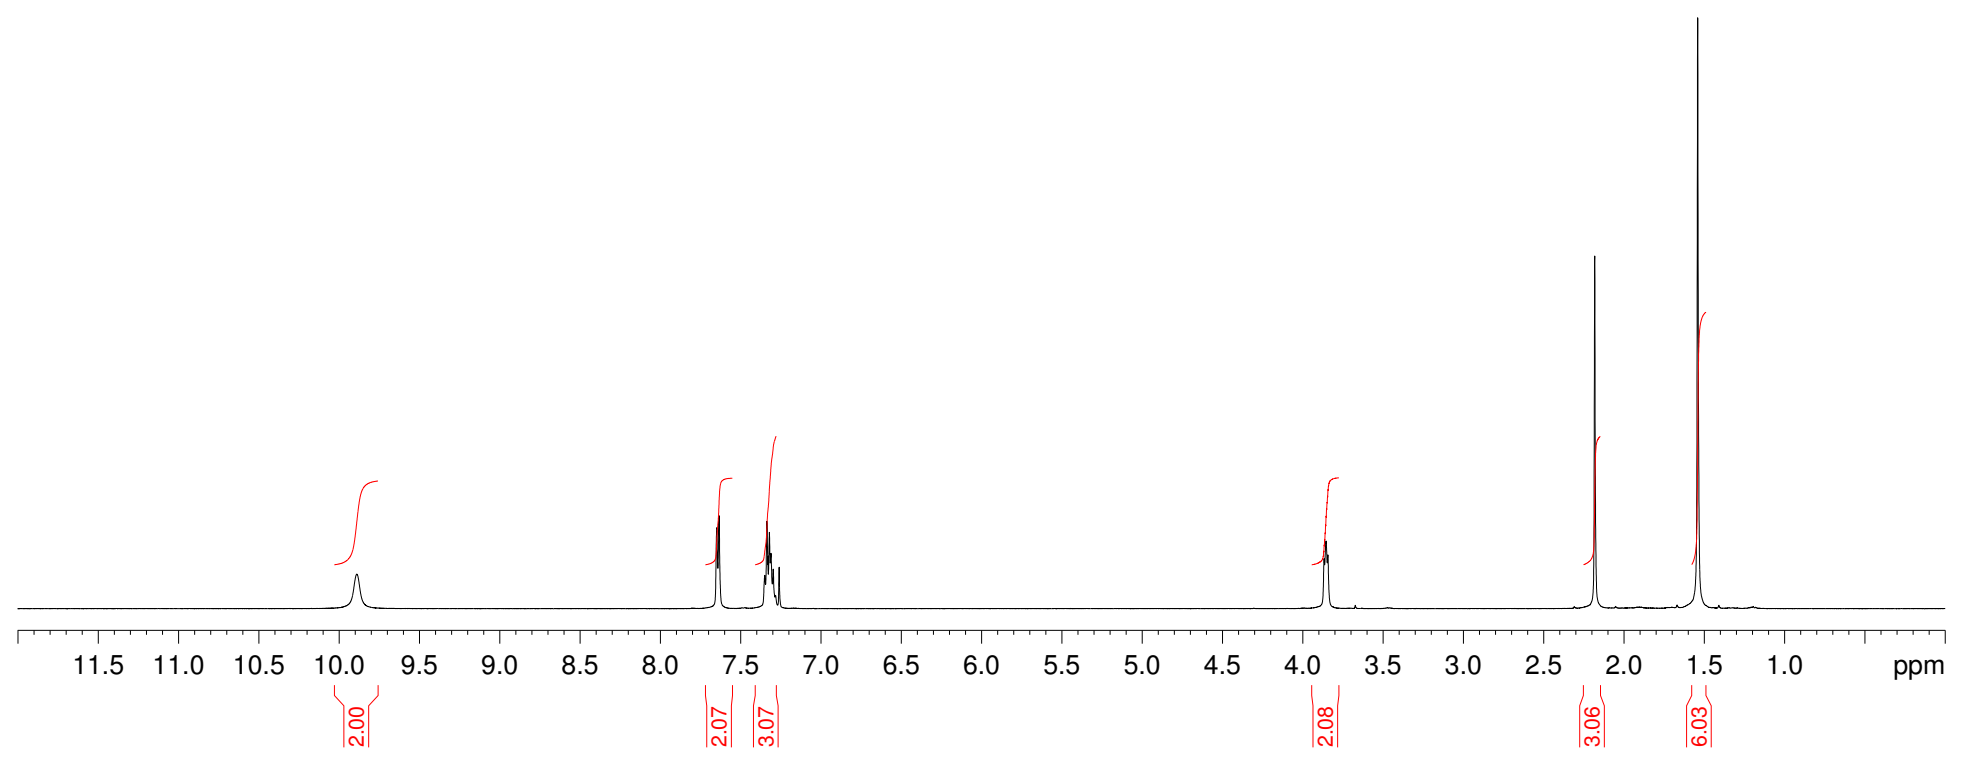

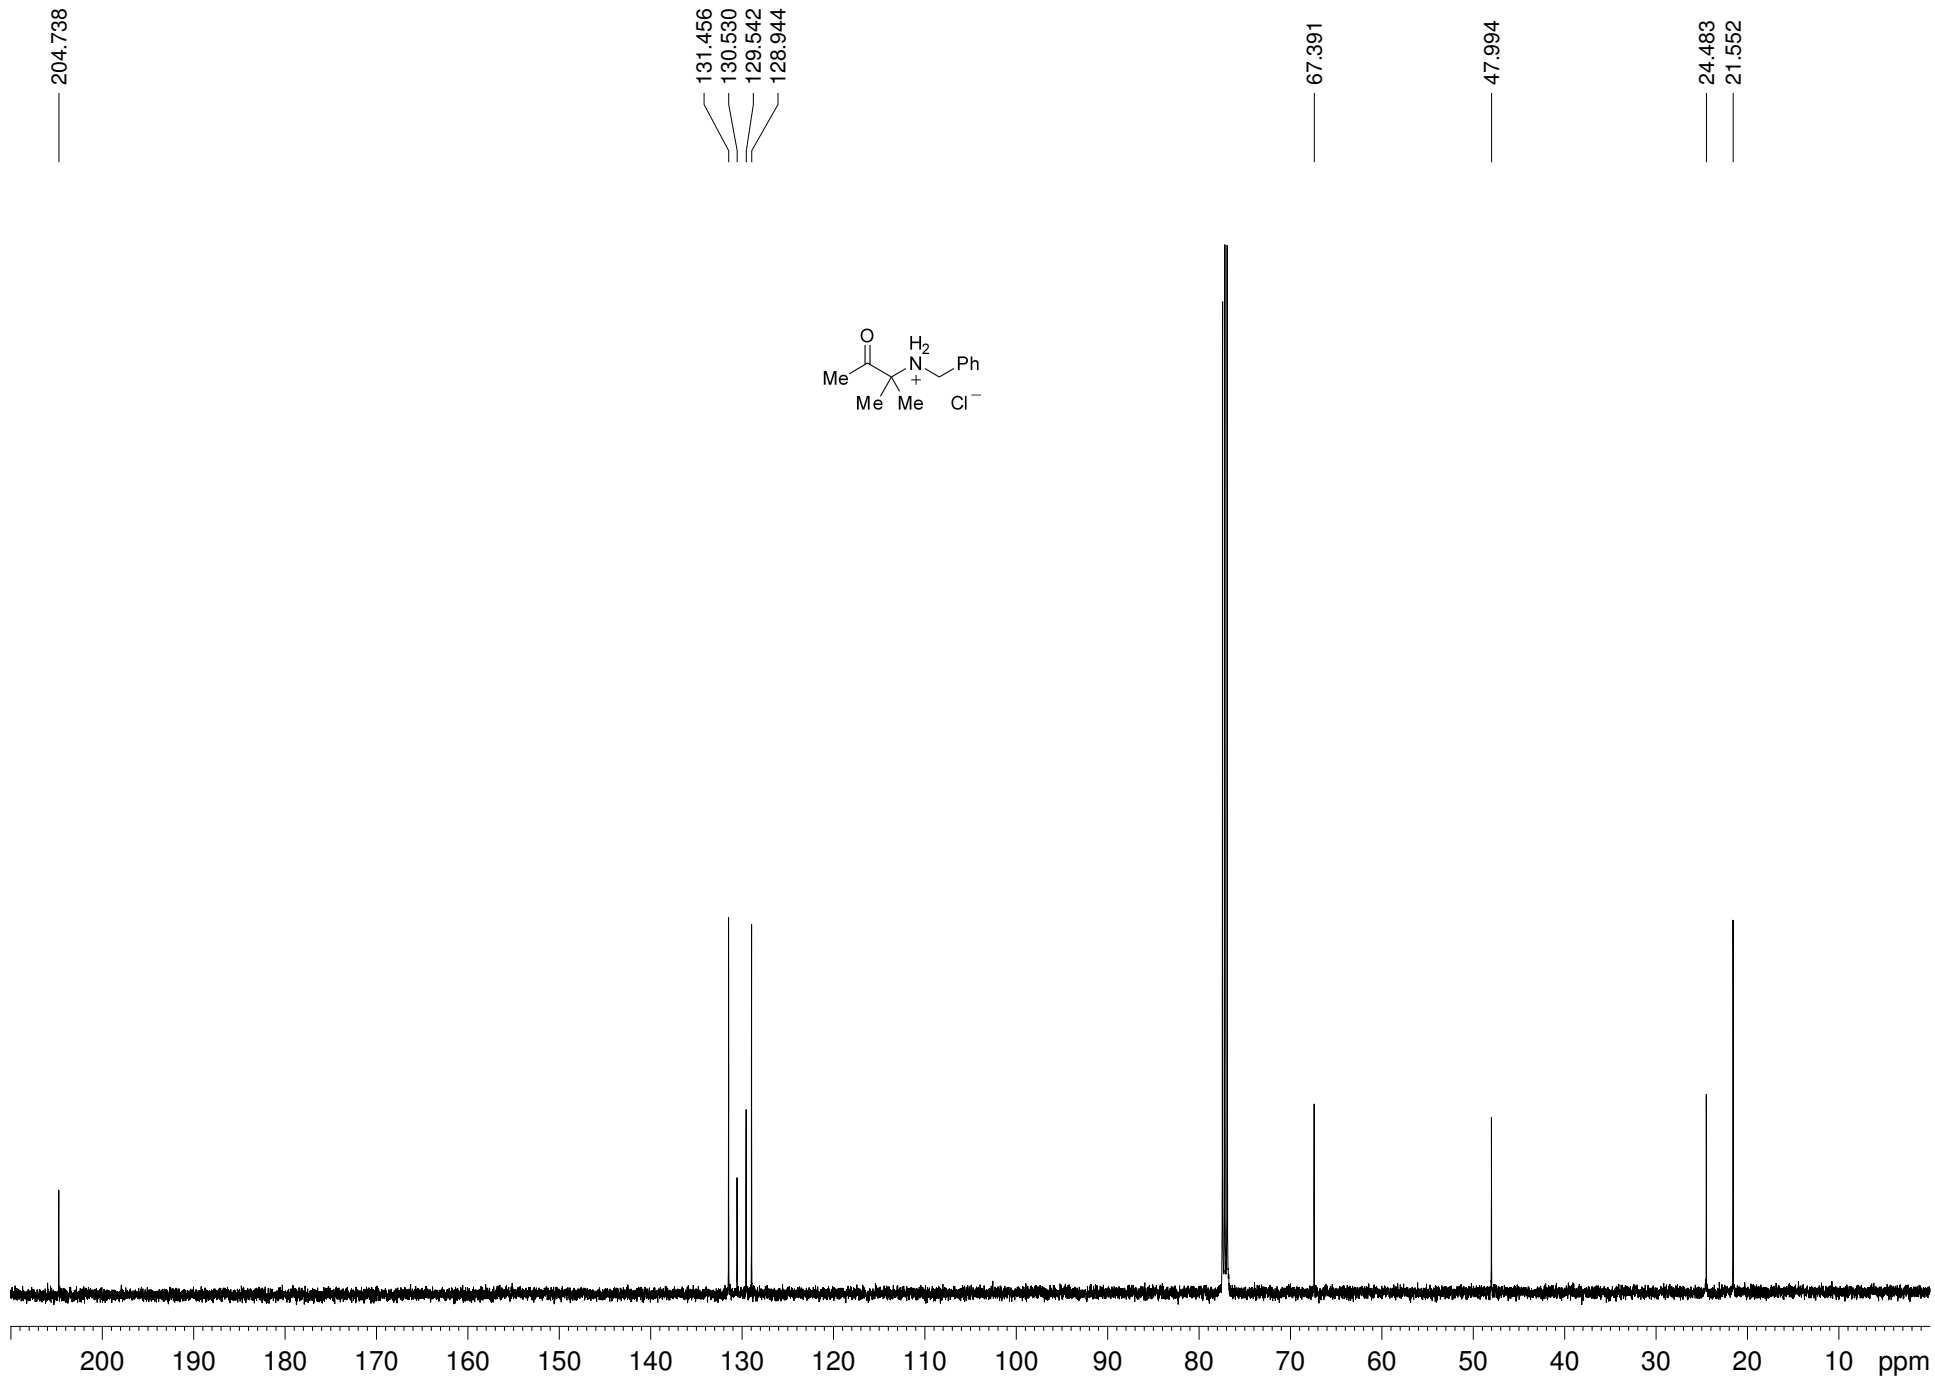

7.398  
7.382  
7.367  
7.362  
7.349  
7.309  
7.296  
7.282  
6.838  
6.830  
6.808  
6.800  
6.464  
6.434

4.964  
4.956  
4.674

3.594  
3.580  
3.565  
3.561  
3.547  
3.533  
3.456  
3.442  
3.427  
3.423  
3.409  
3.395

2.178

1.303  
1.133  
1.119  
1.105

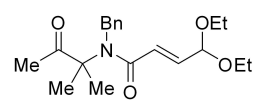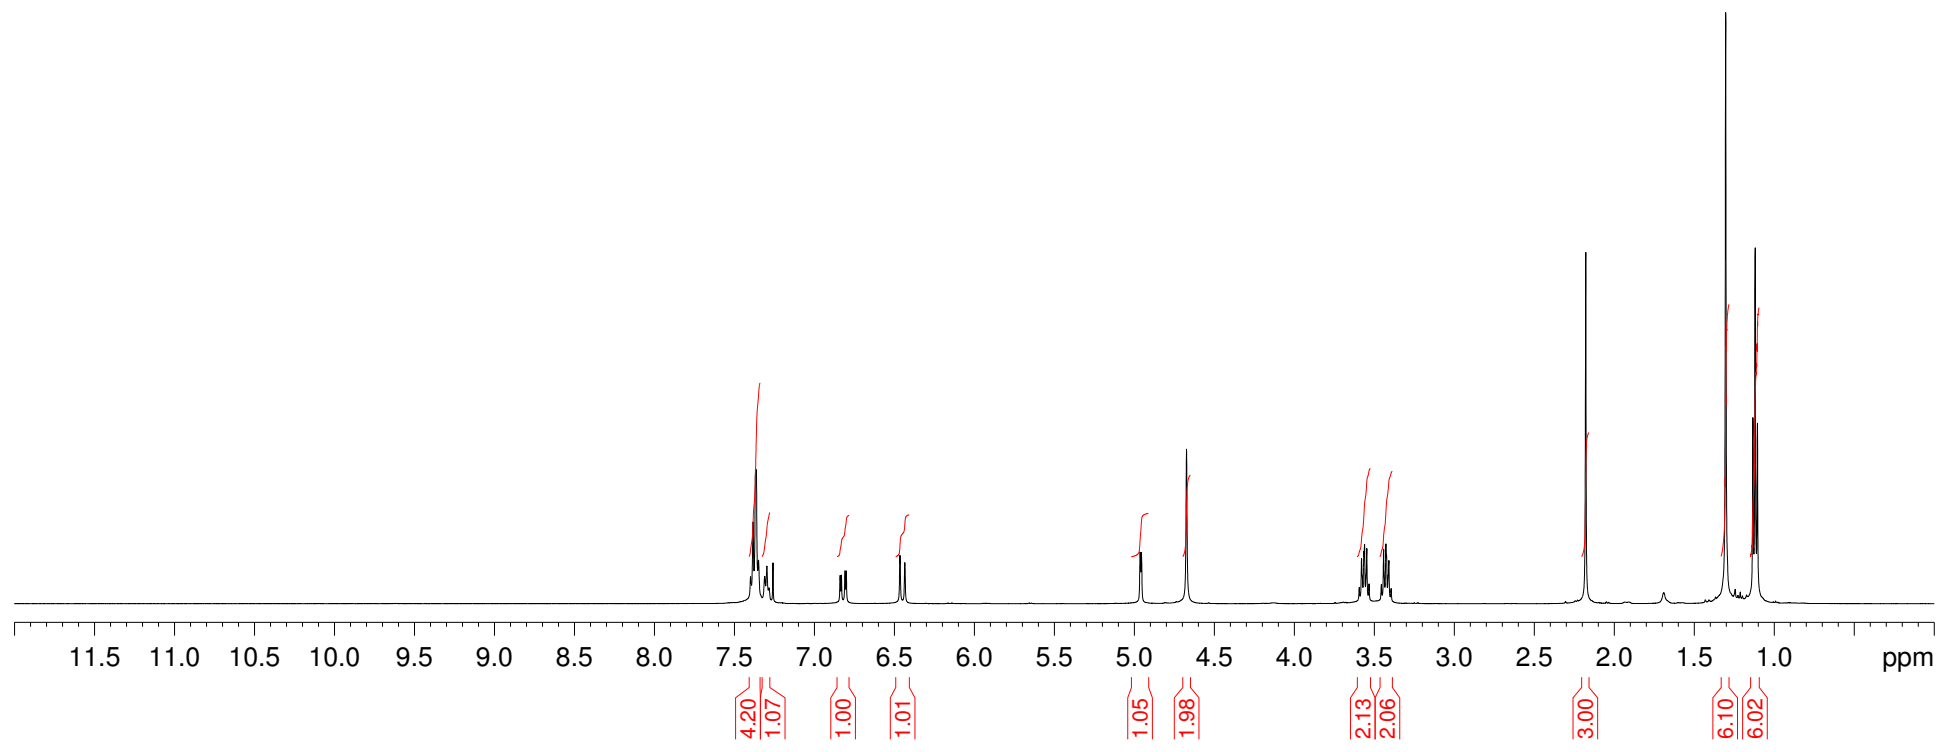

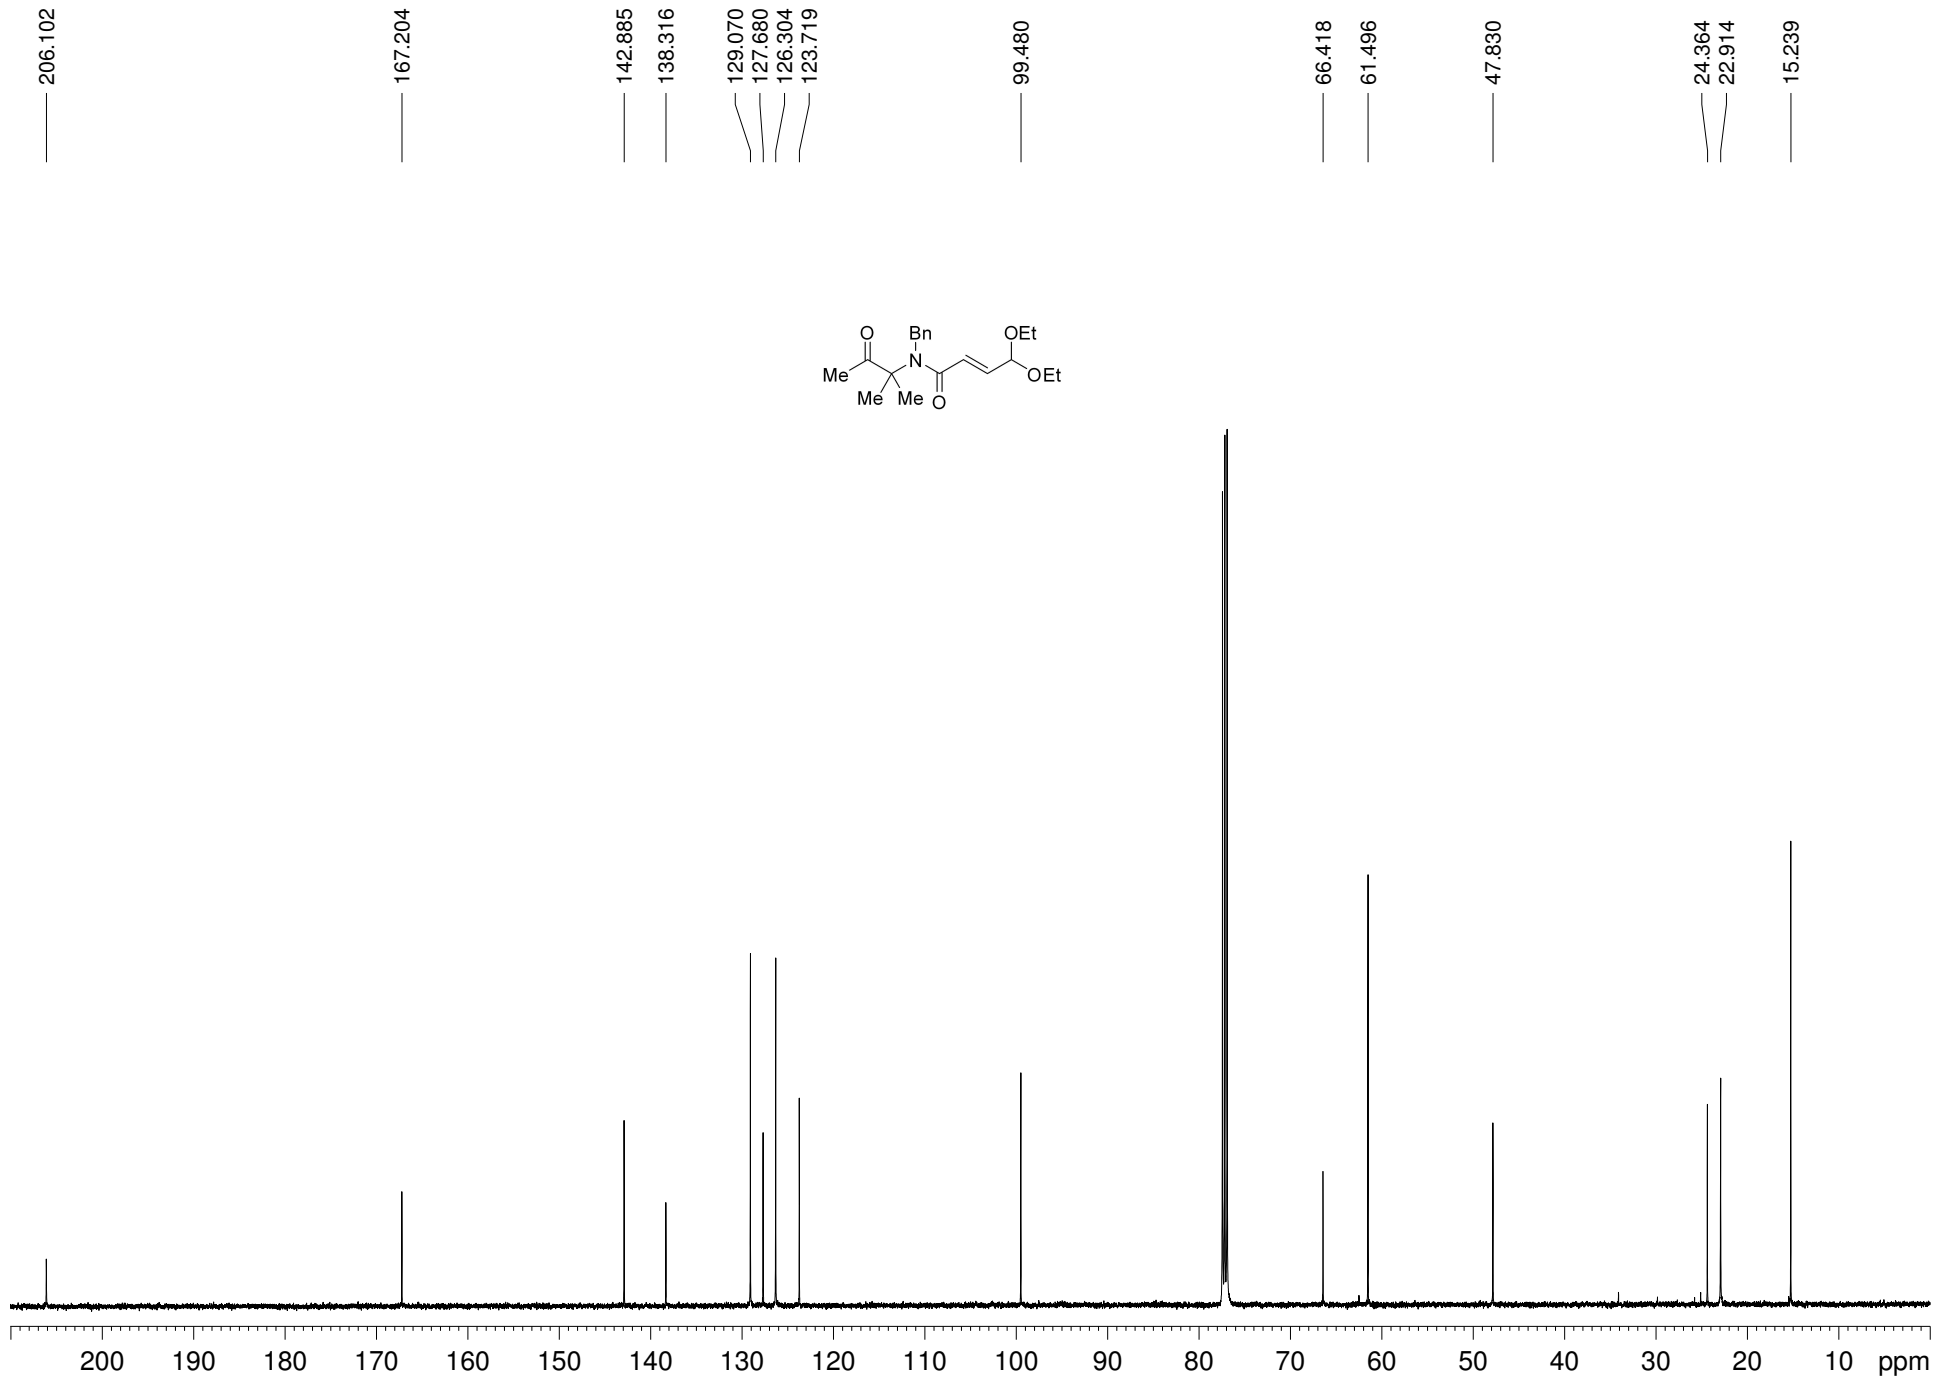



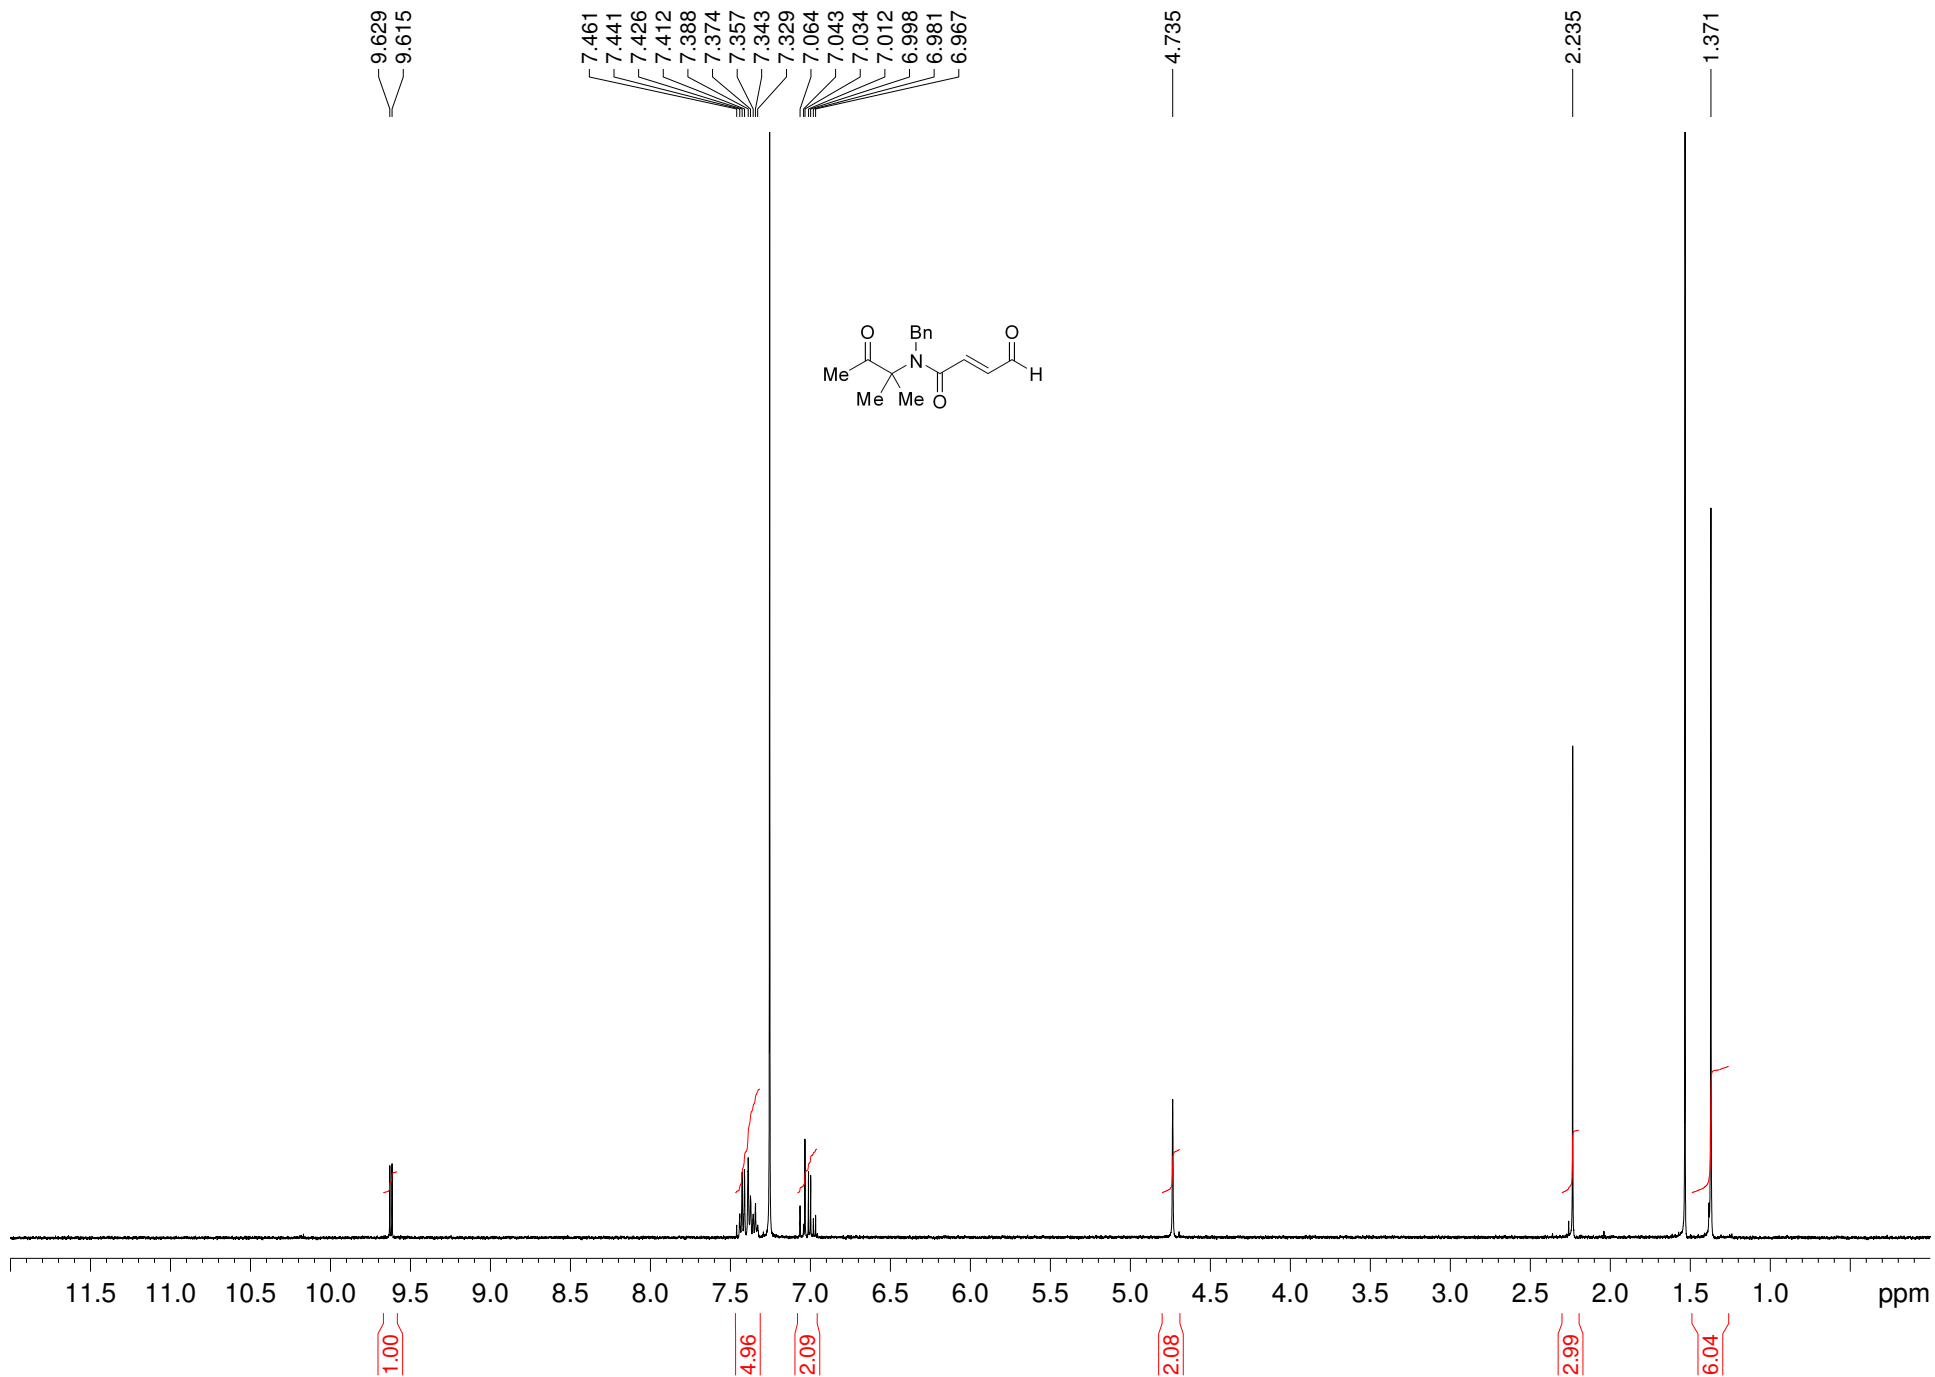

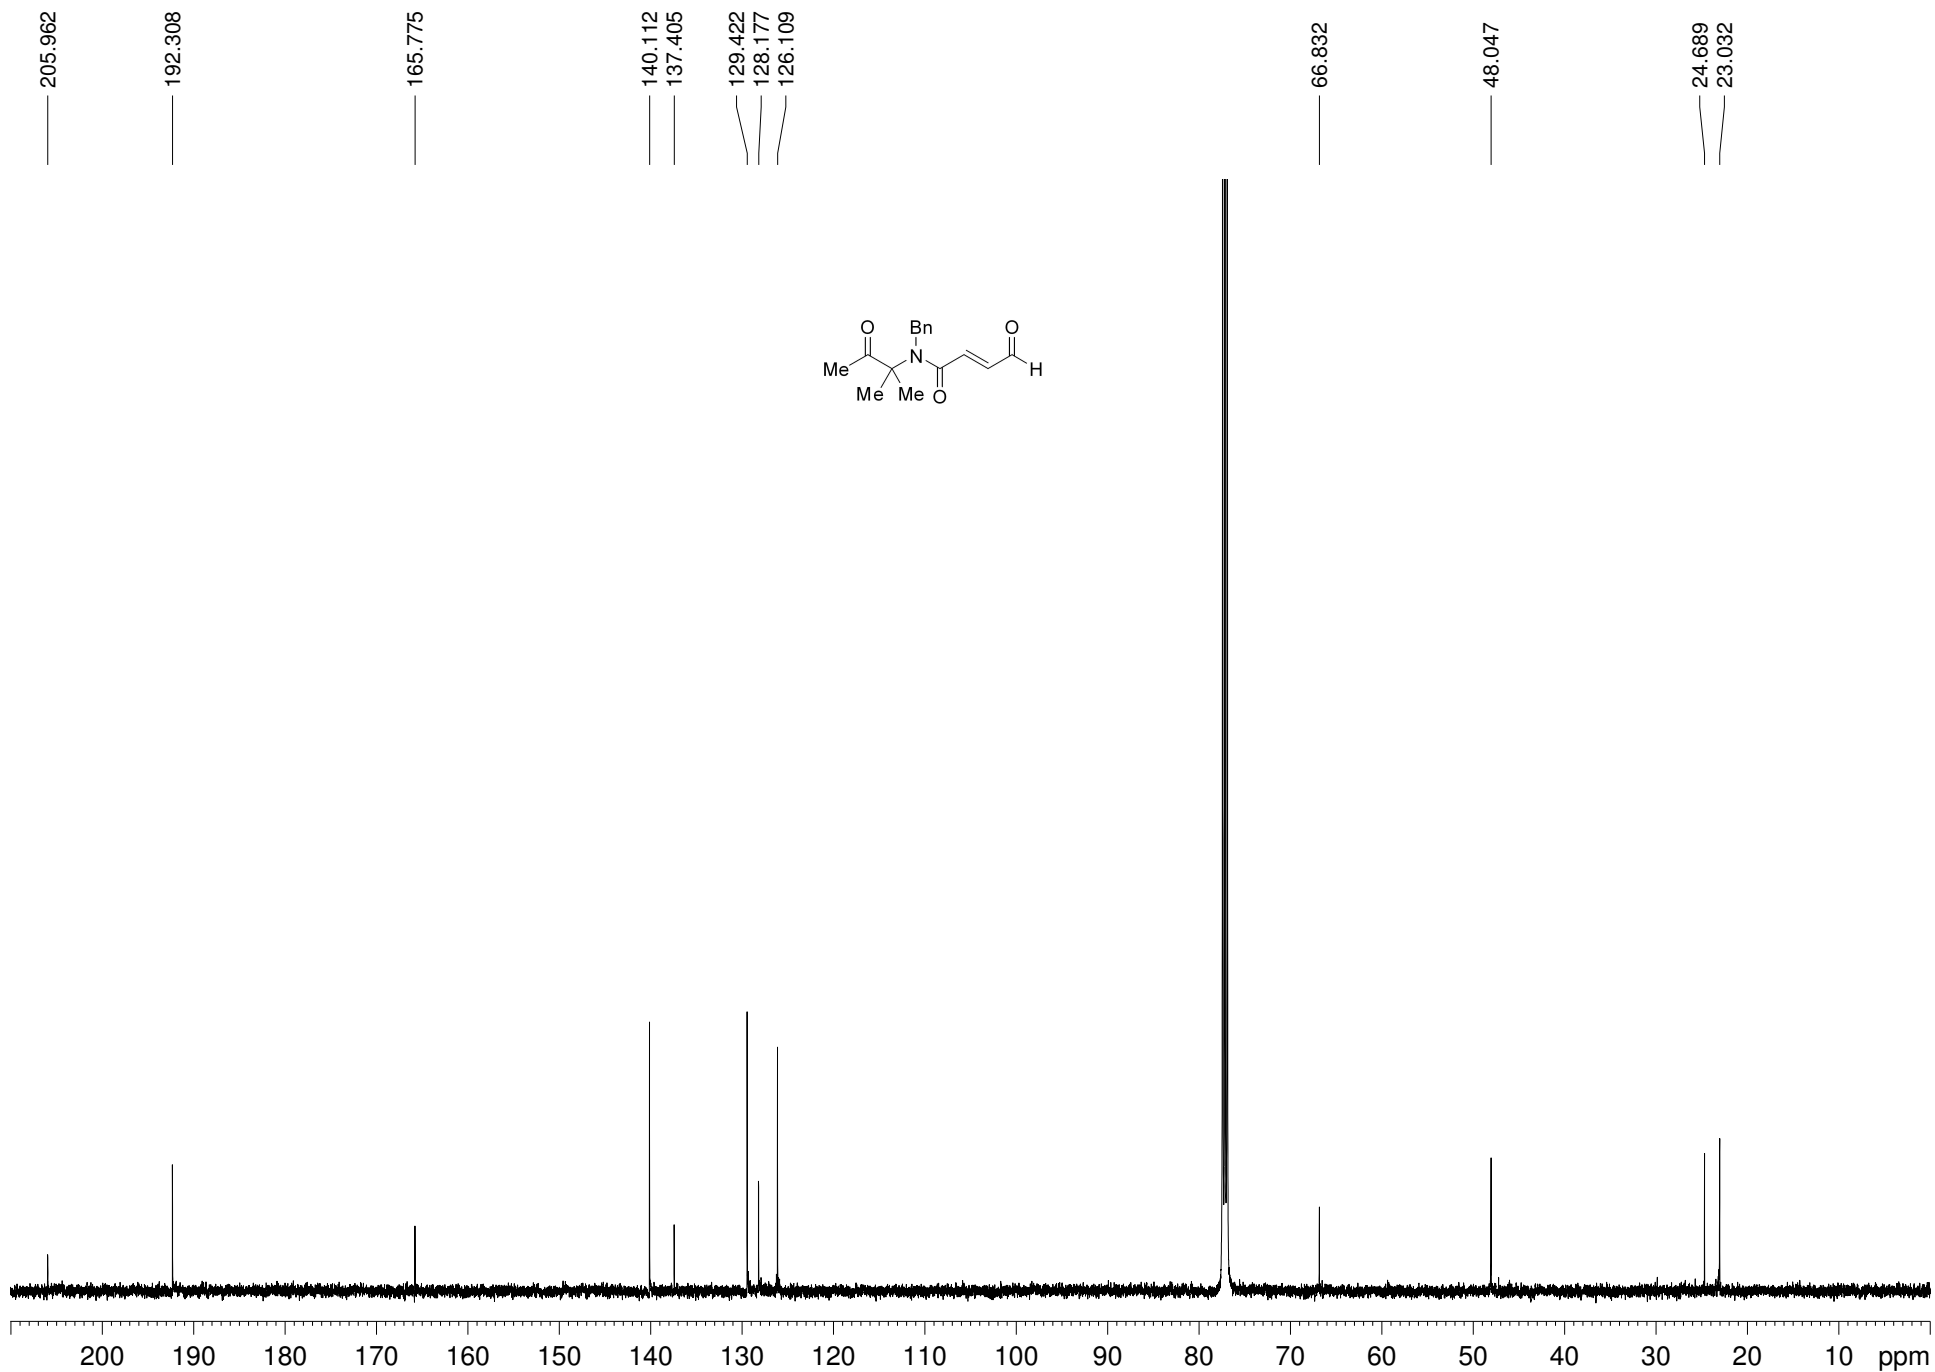

7.311  
7.309  
7.306  
7.295  
7.292  
7.280  
7.260  
7.253  
7.251  
7.239  
7.233  
7.223  
7.220  
7.206

4.535  
4.504  
4.422  
4.391

3.100  
3.099  
3.064  
3.063  
3.037  
3.019  
2.919  
2.901  
2.883  
2.865

1.451  
1.258  
1.071

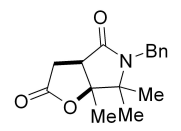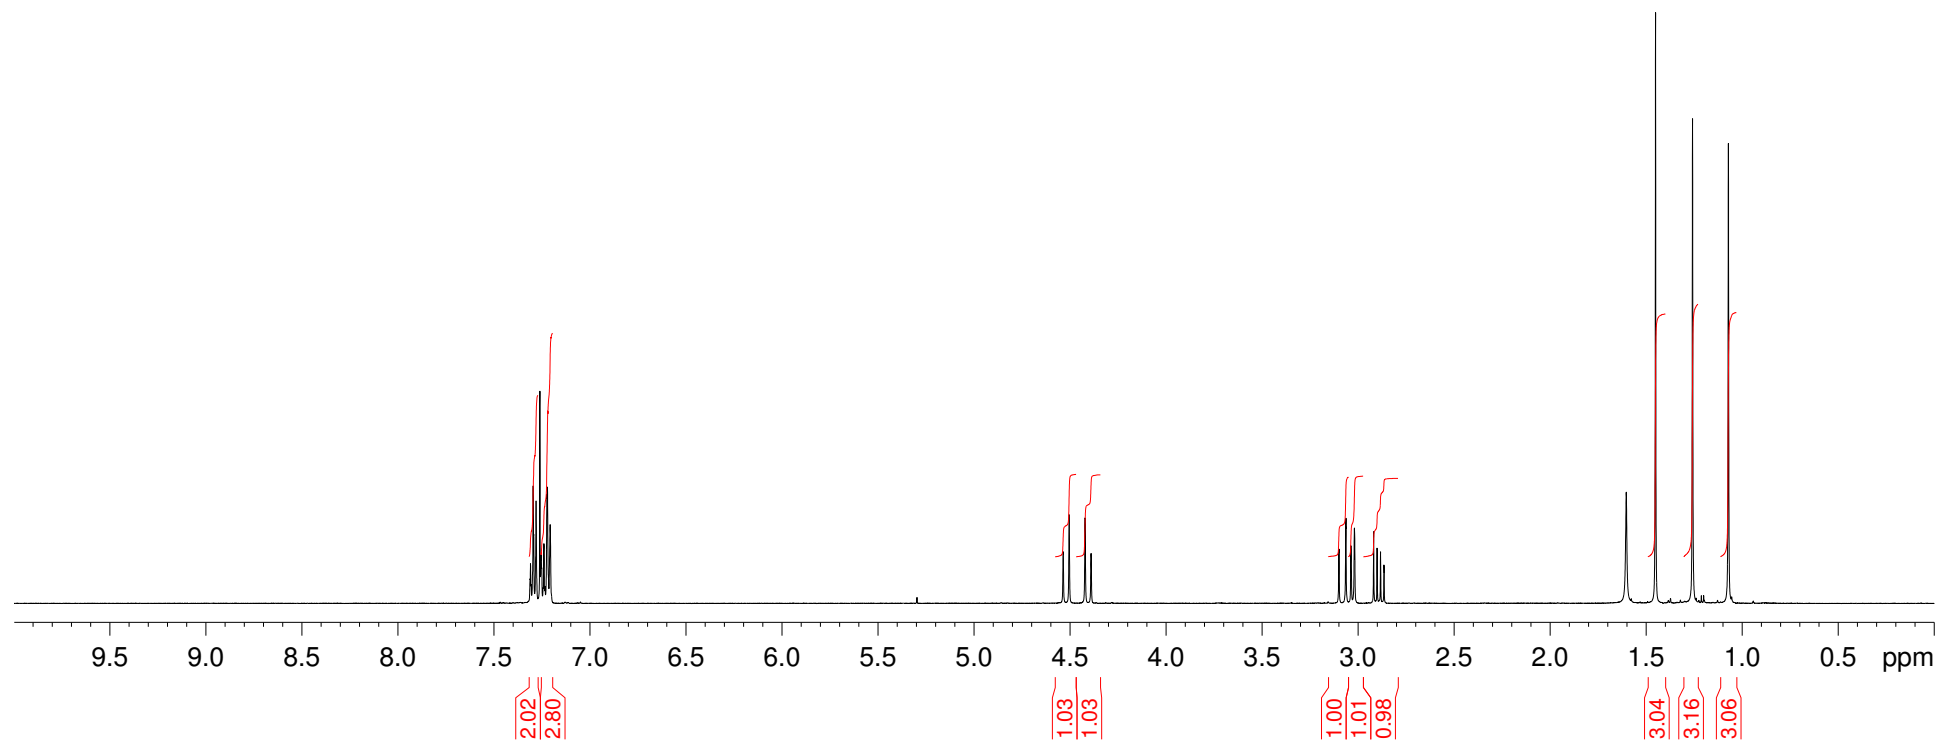

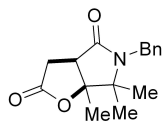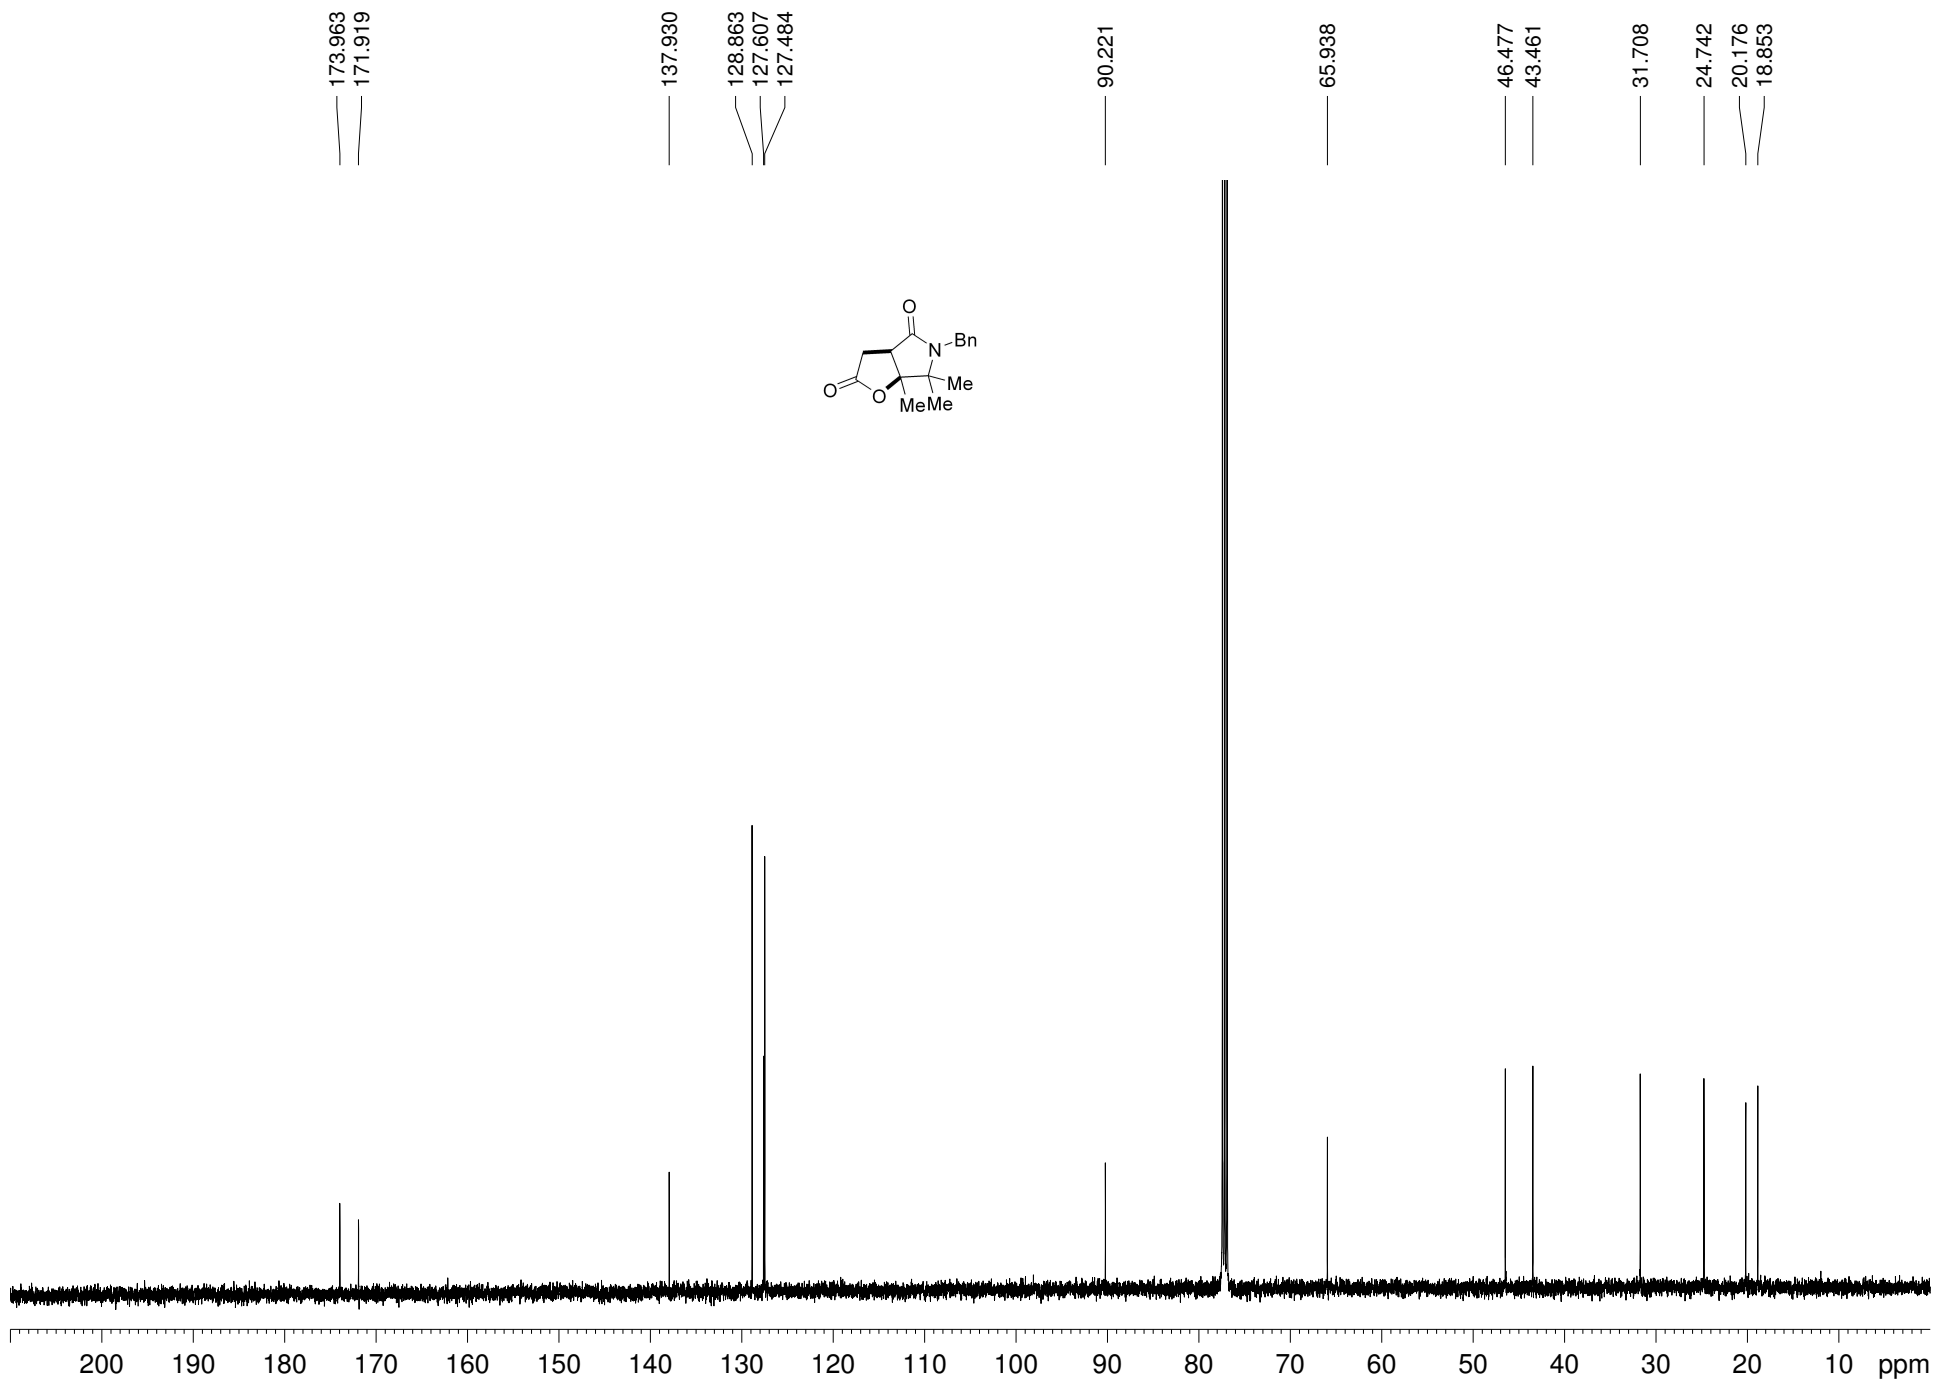

7.331  
7.314  
7.287  
7.274  
7.259  
7.124  
7.120  
7.109  
6.908  
6.891  
6.114  
6.095  
6.084  
6.076  
6.069  
6.066  
6.052  
6.031  
6.002

4.930  
4.893  
4.784  
4.747  
4.313  
4.289  
4.277  
4.253  
3.819  
3.792  
3.774  
3.762  
3.741

2.423

1.786  
1.776

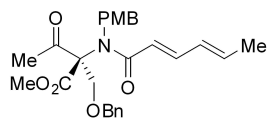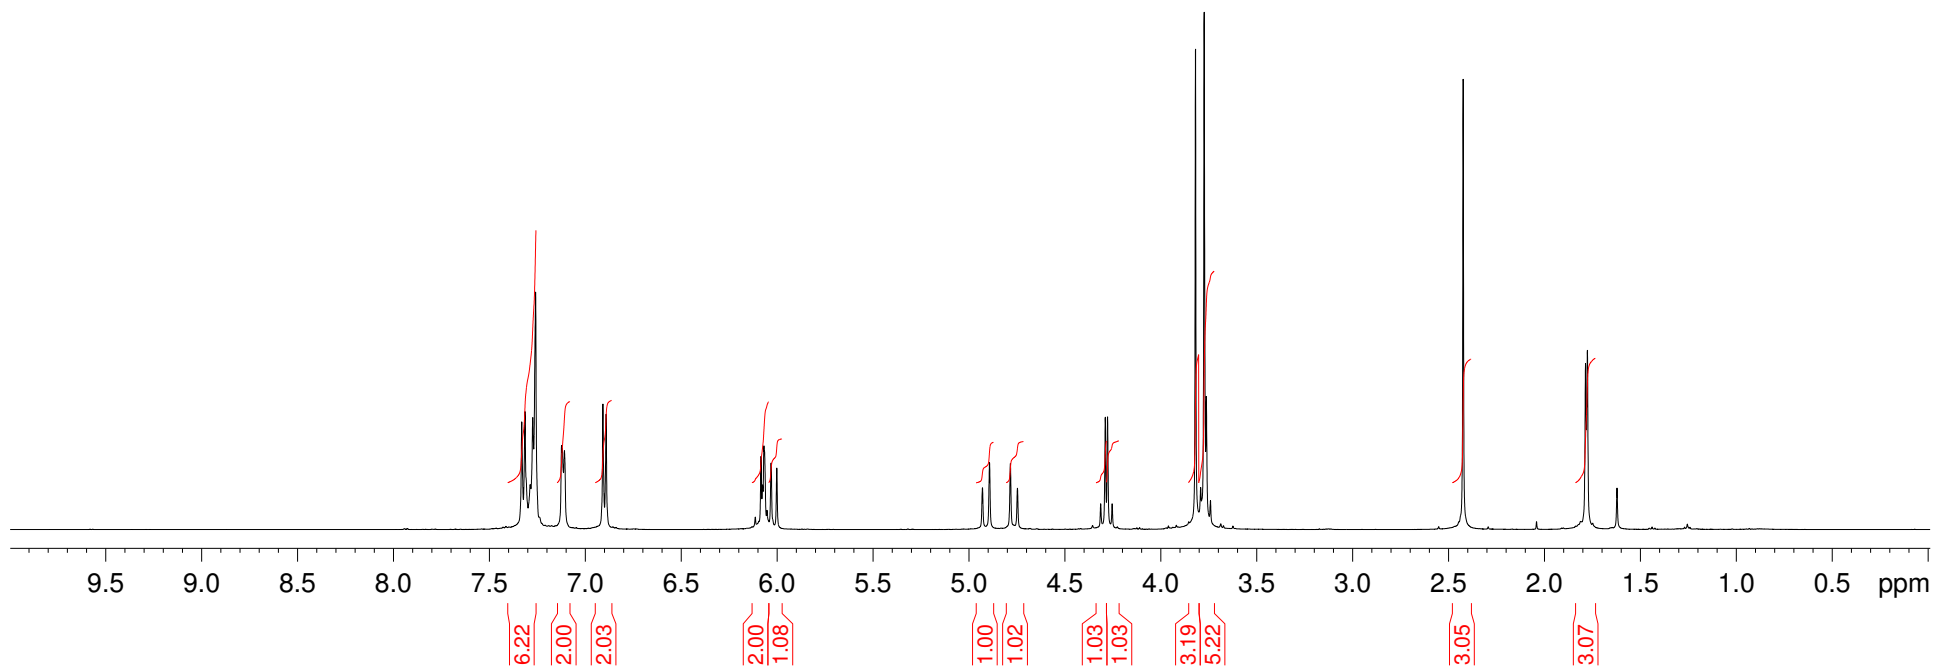

198.101

169.898  
168.772

158.804

145.396  
139.145  
136.963  
130.853  
130.248  
128.491  
127.958  
127.624  
127.263  
117.881  
114.184

73.852  
70.743

55.409  
52.935  
48.932

28.132

18.712

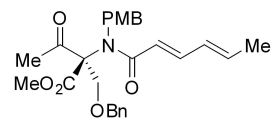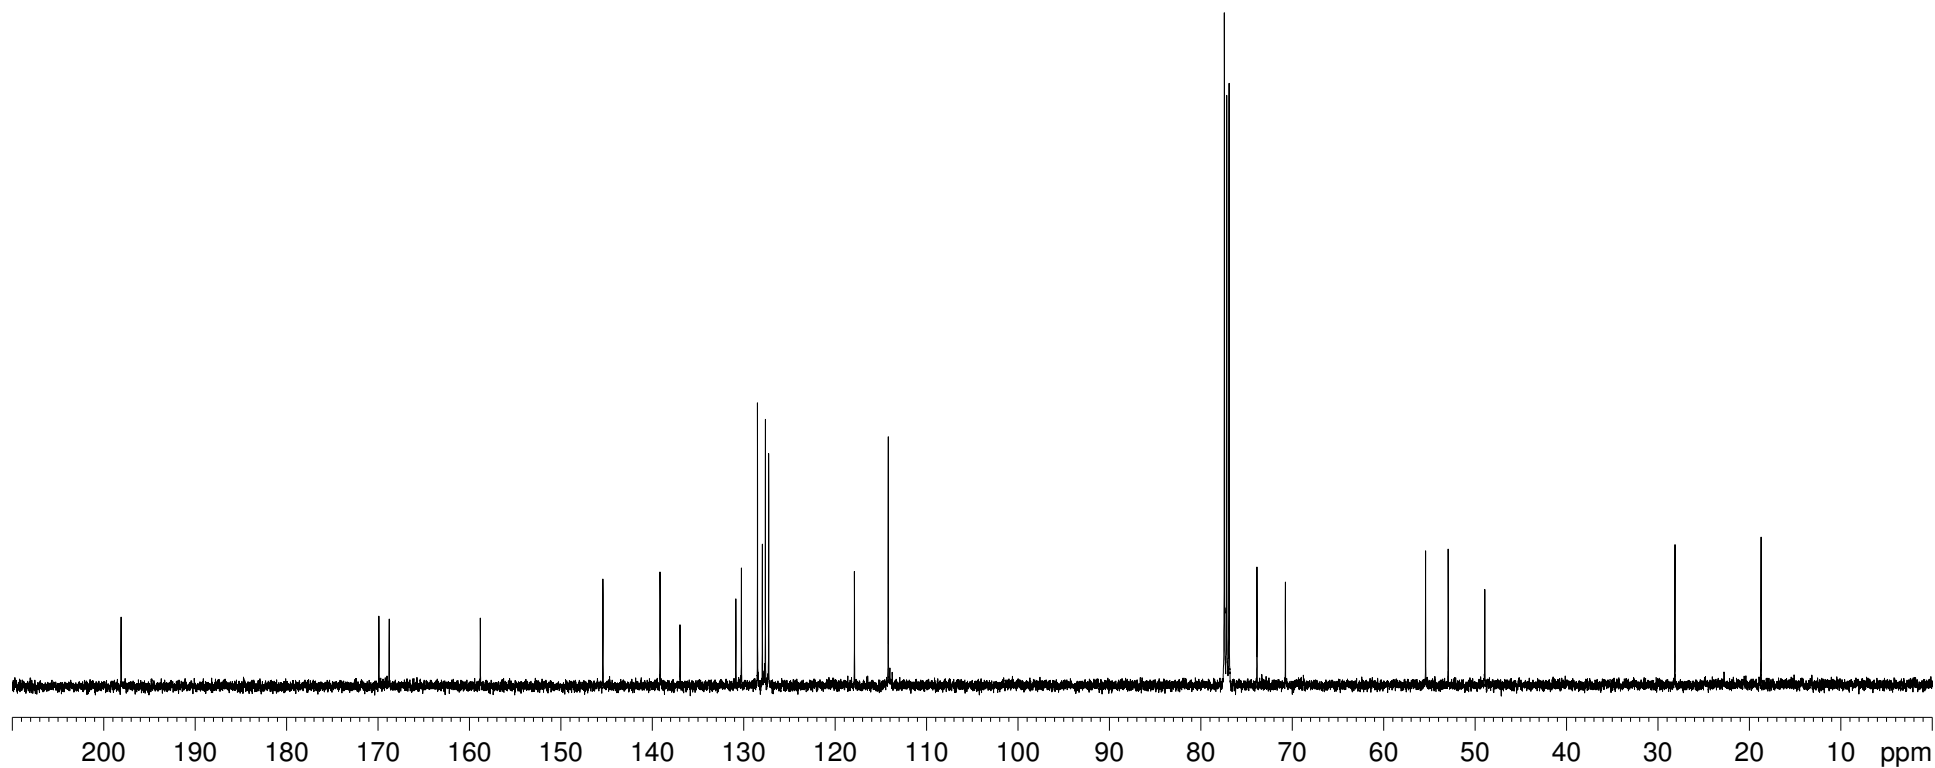

7.367  
7.359  
7.313  
7.296  
7.283  
7.272  
7.269  
7.260  
7.126  
7.121  
7.111  
6.896  
6.879  
6.868  
6.858  
6.838  
6.828  
6.431  
6.401

4.932  
4.895  
4.807  
4.771  
4.305  
4.281  
4.274  
4.250  
3.932  
3.924  
3.809  
3.779  
3.742  
3.618

2.564  
2.554  
2.412

1.700

1.152  
1.139

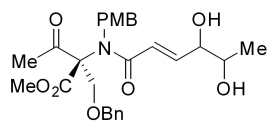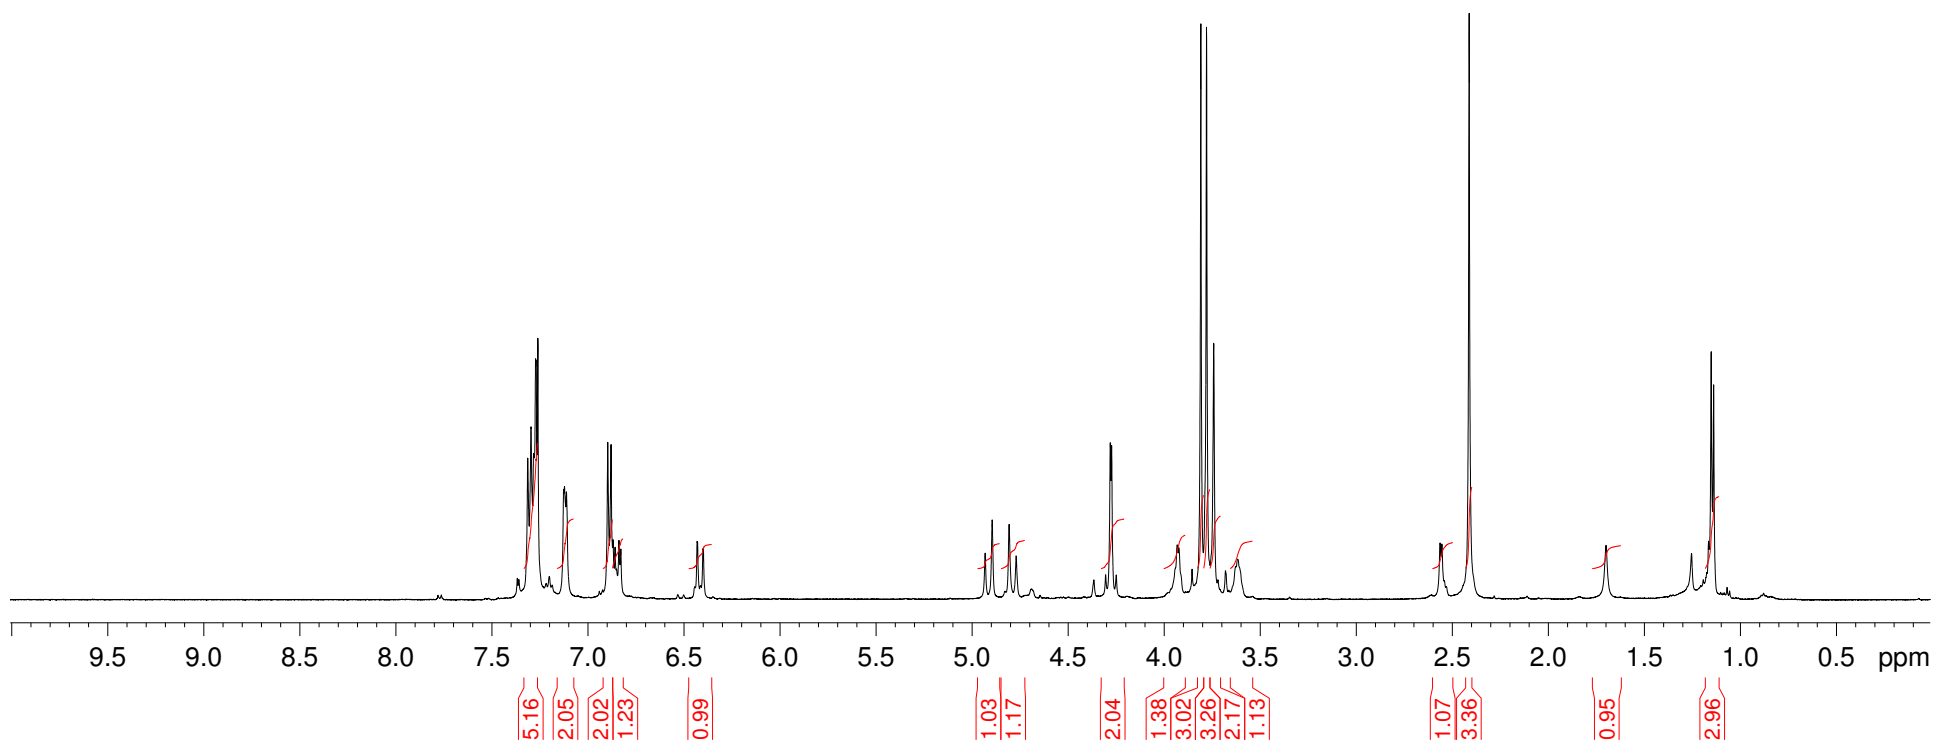

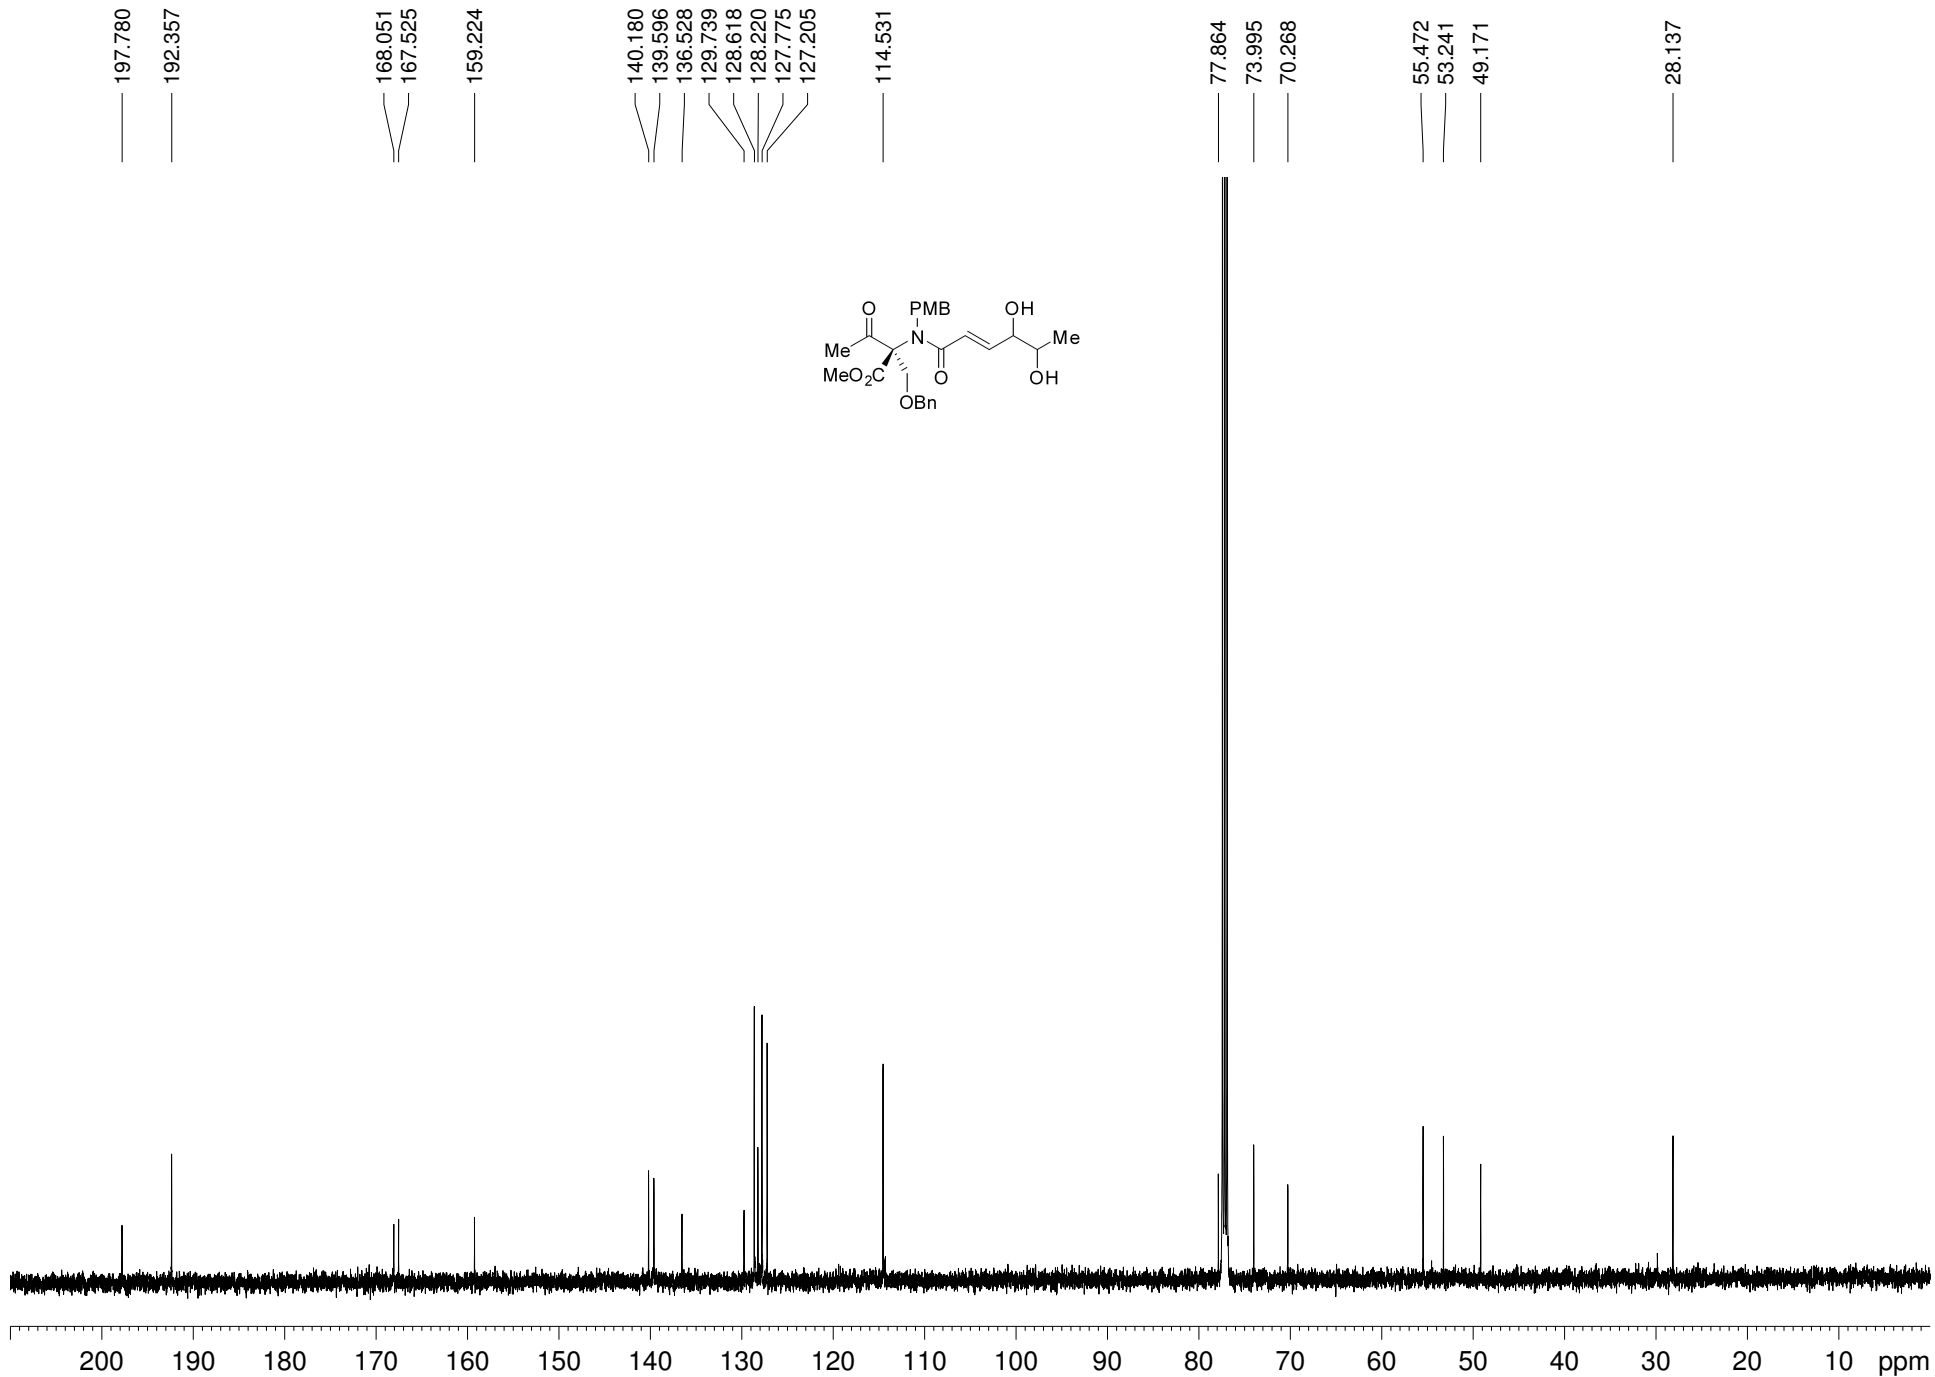



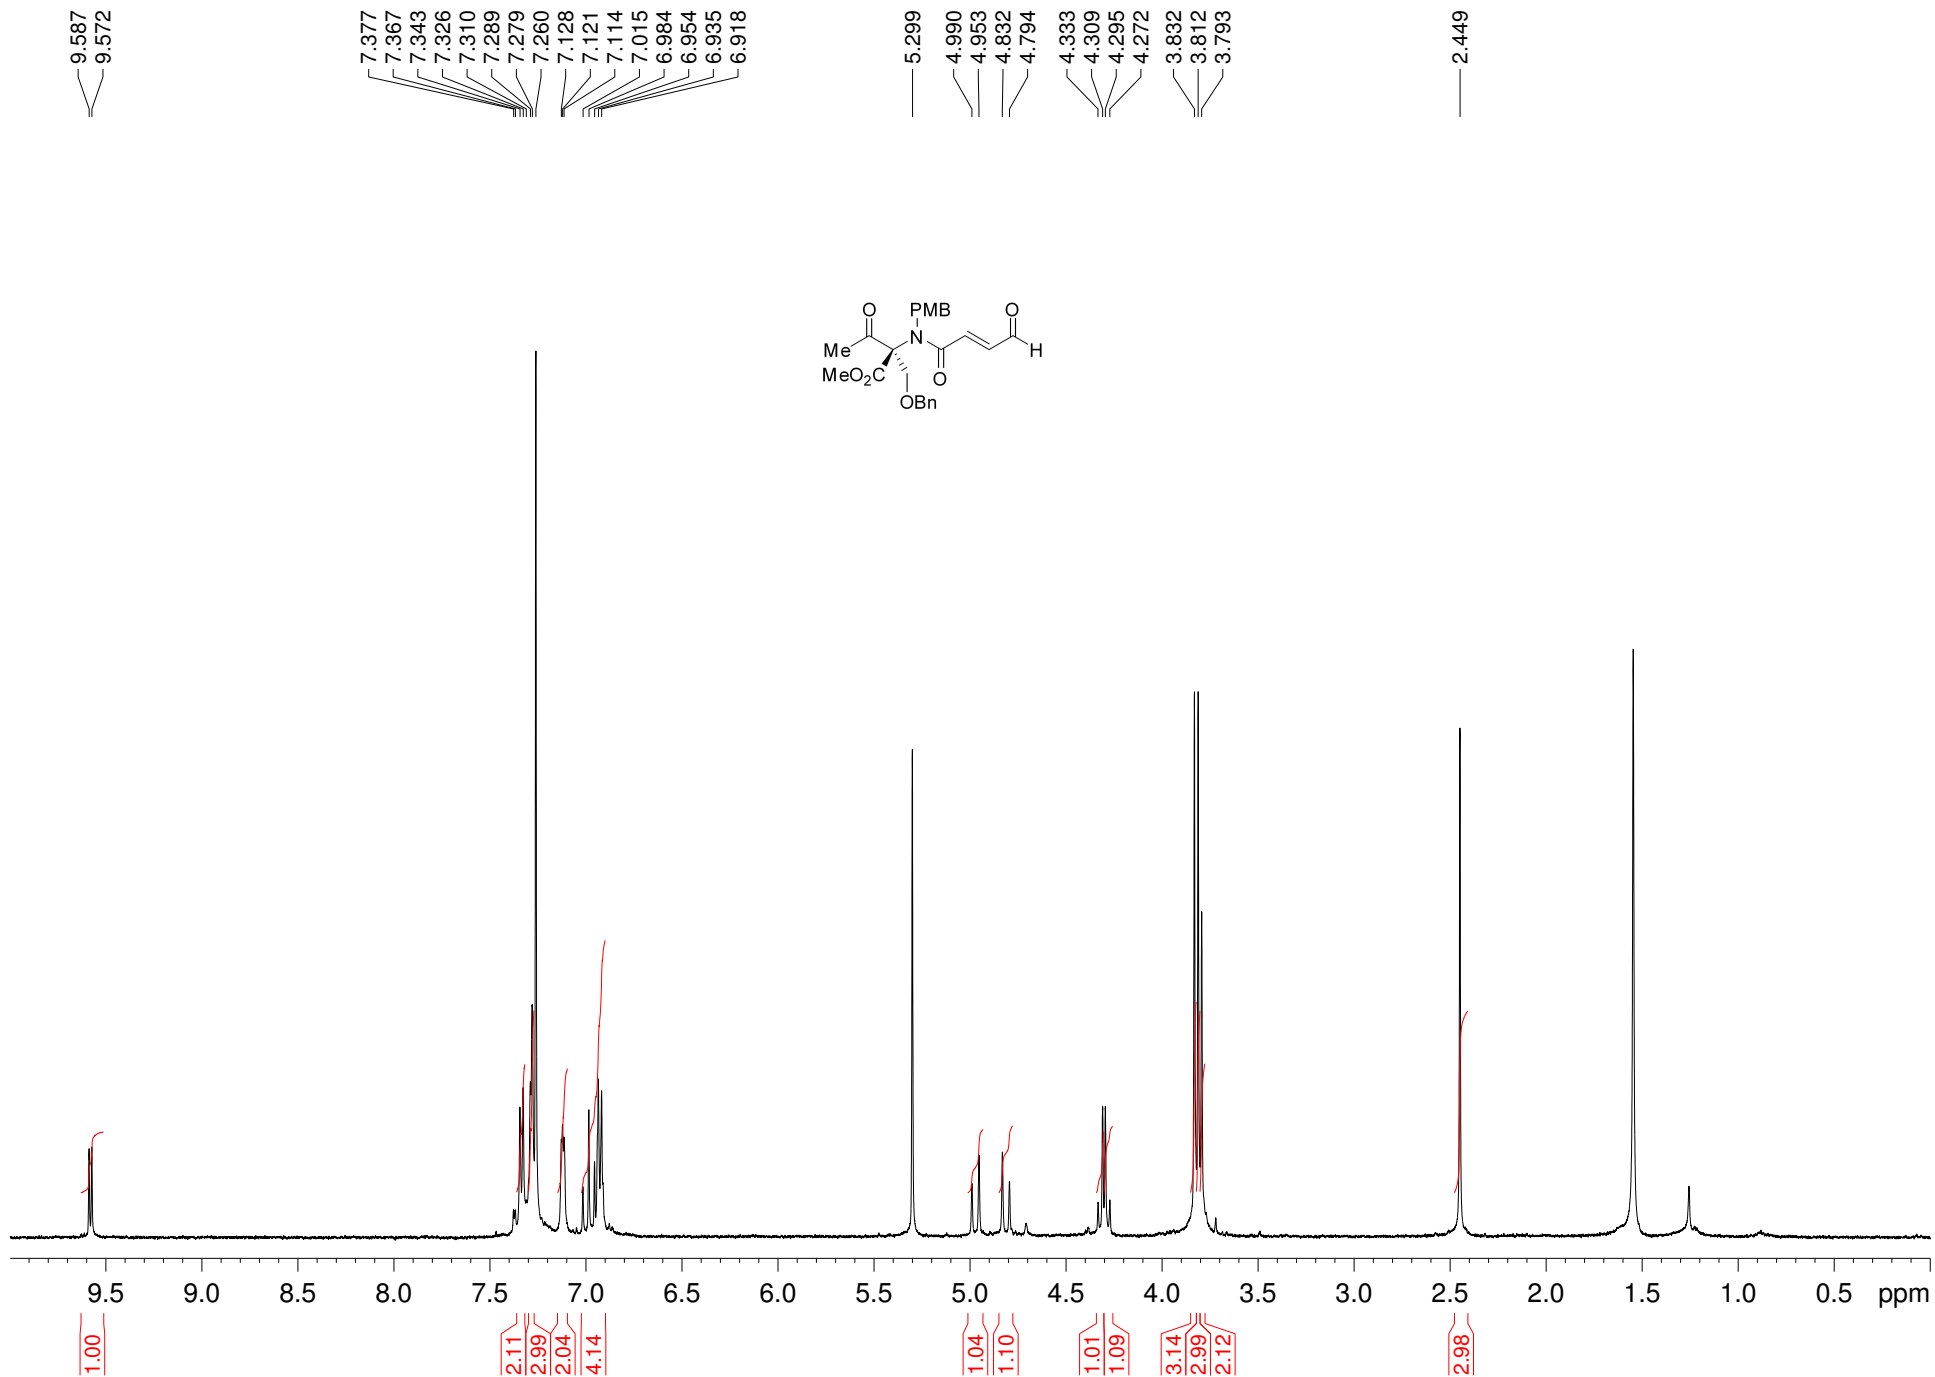

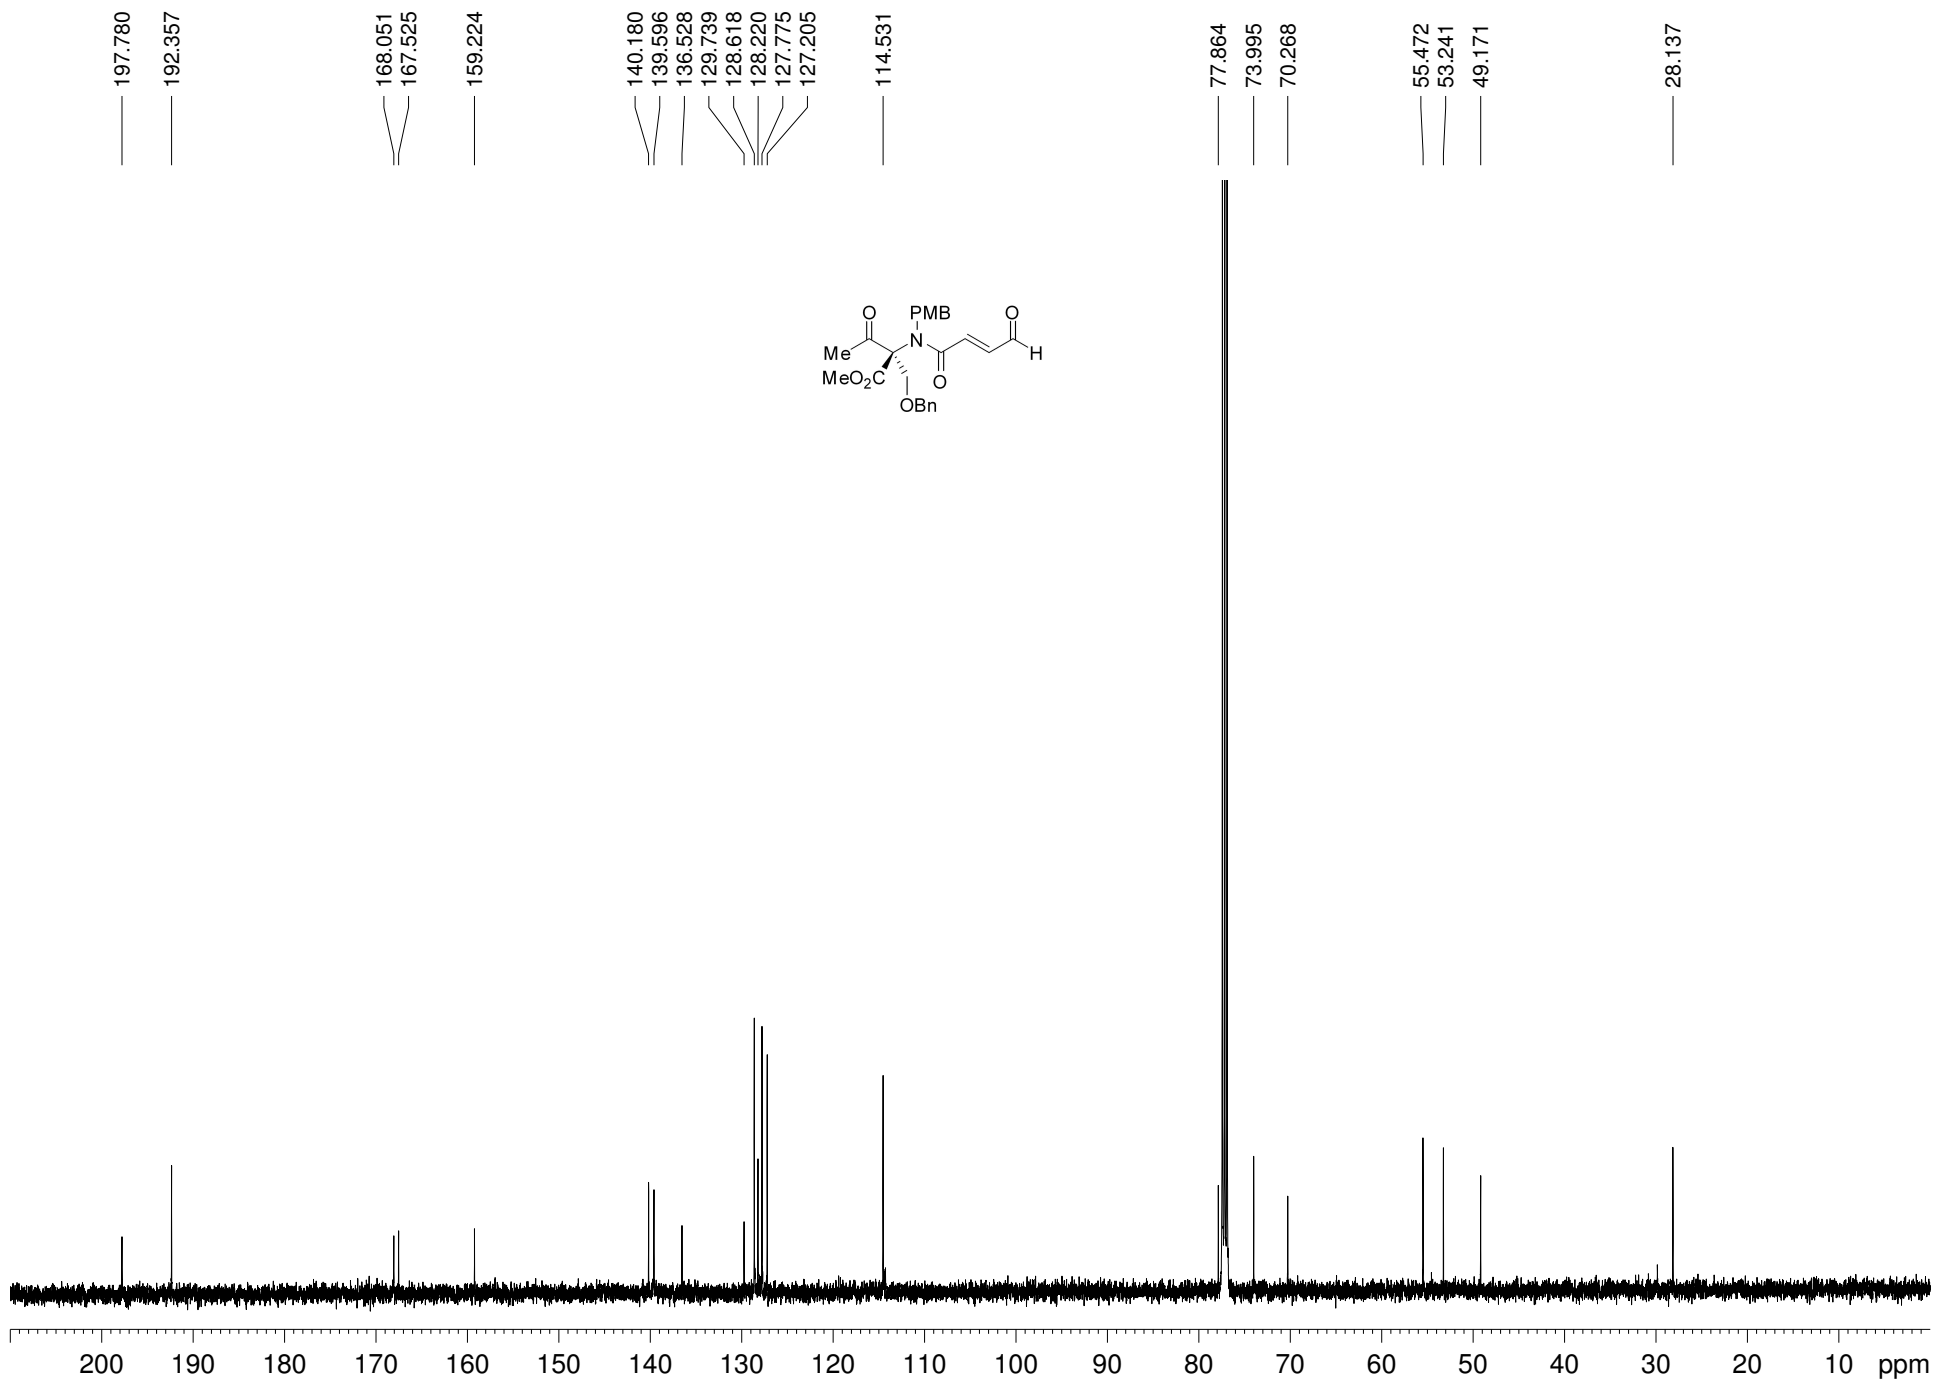

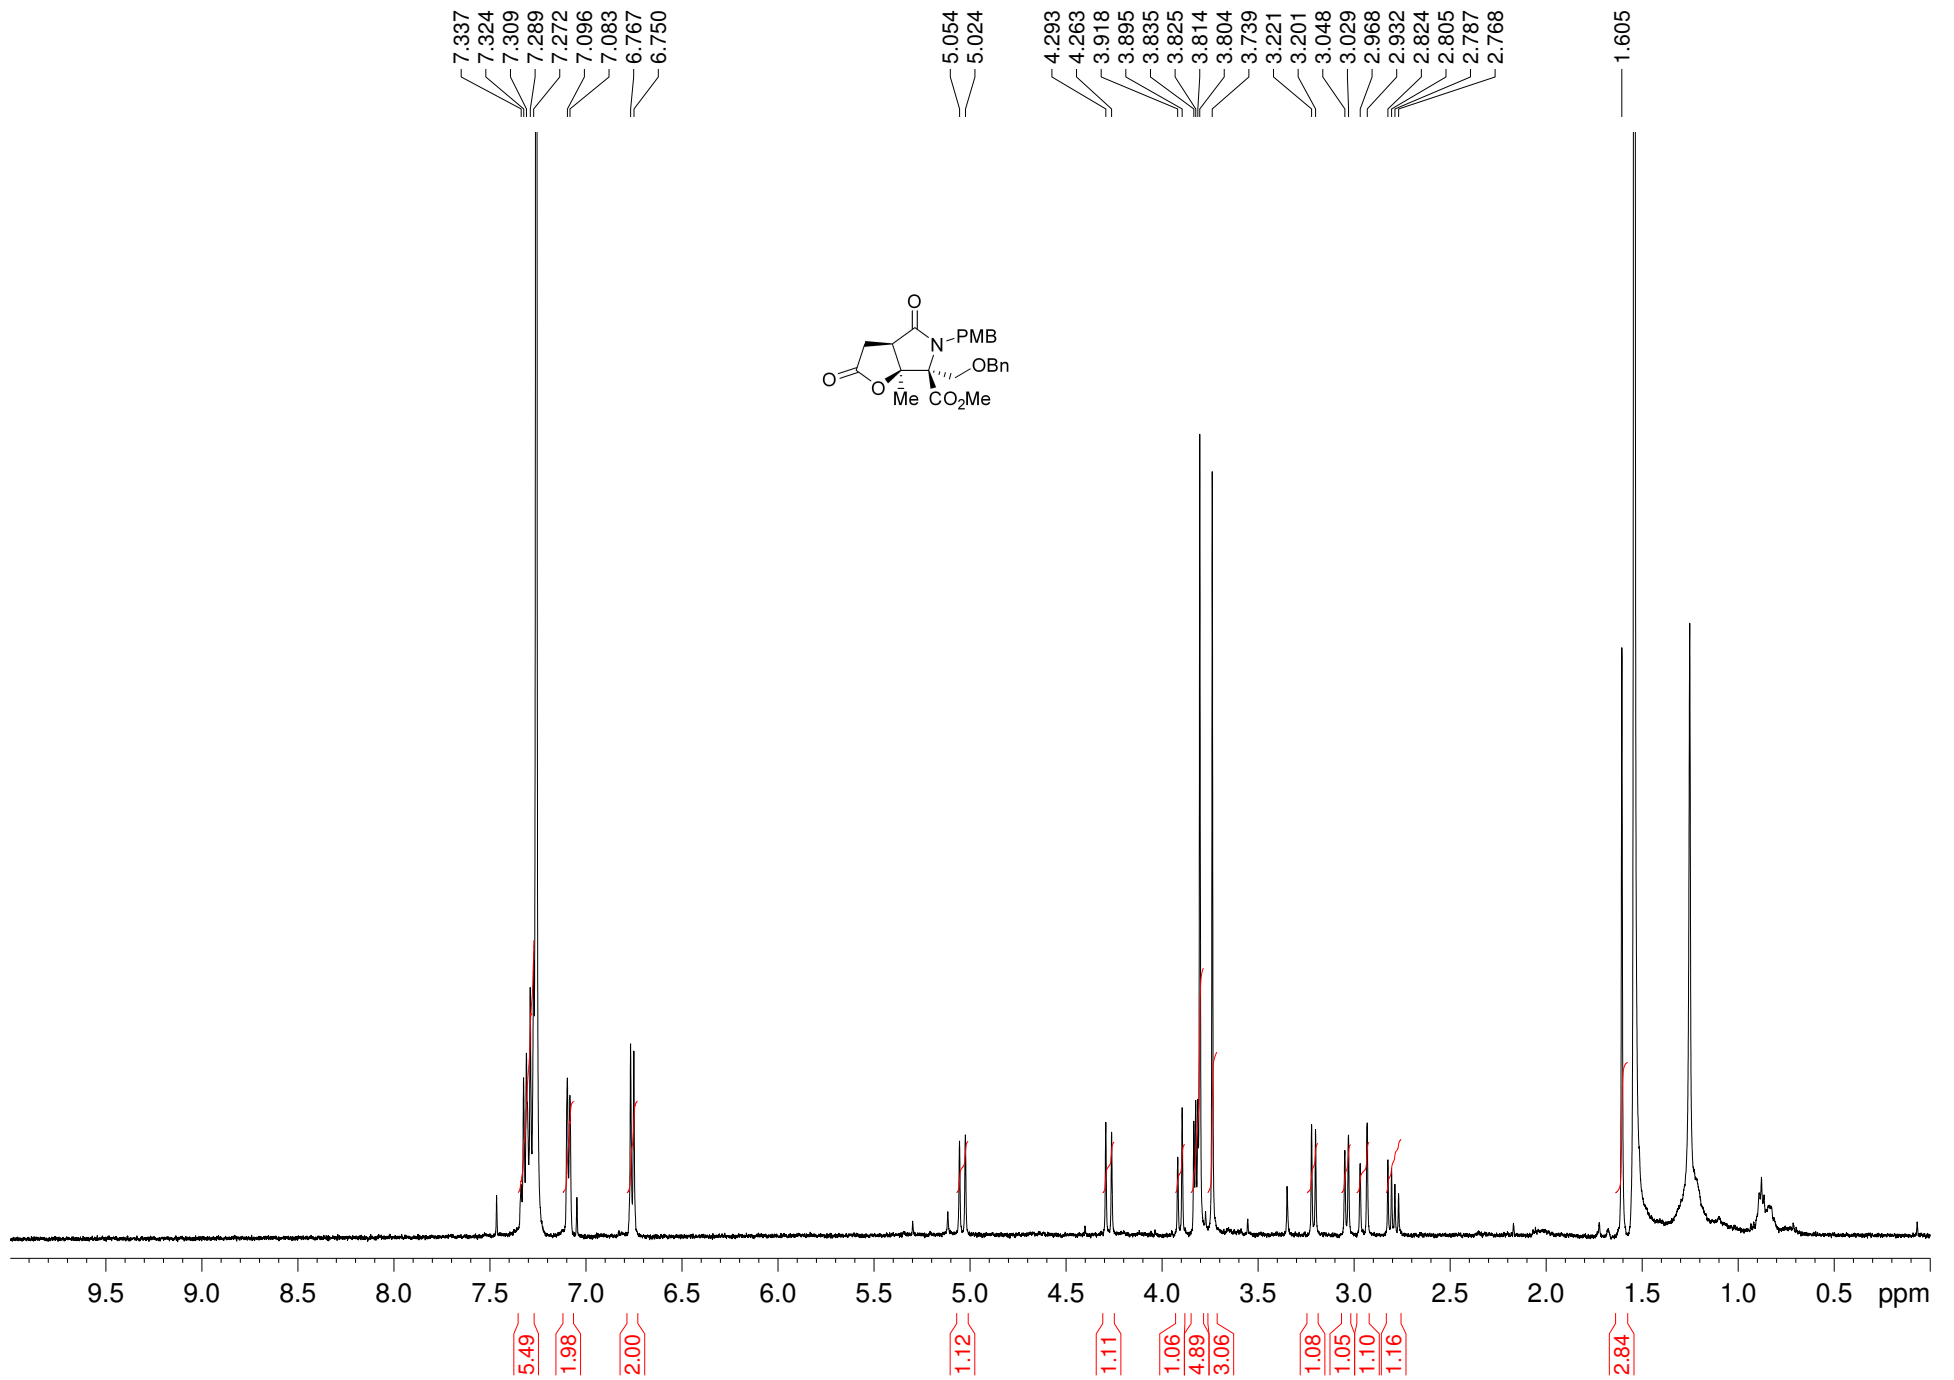

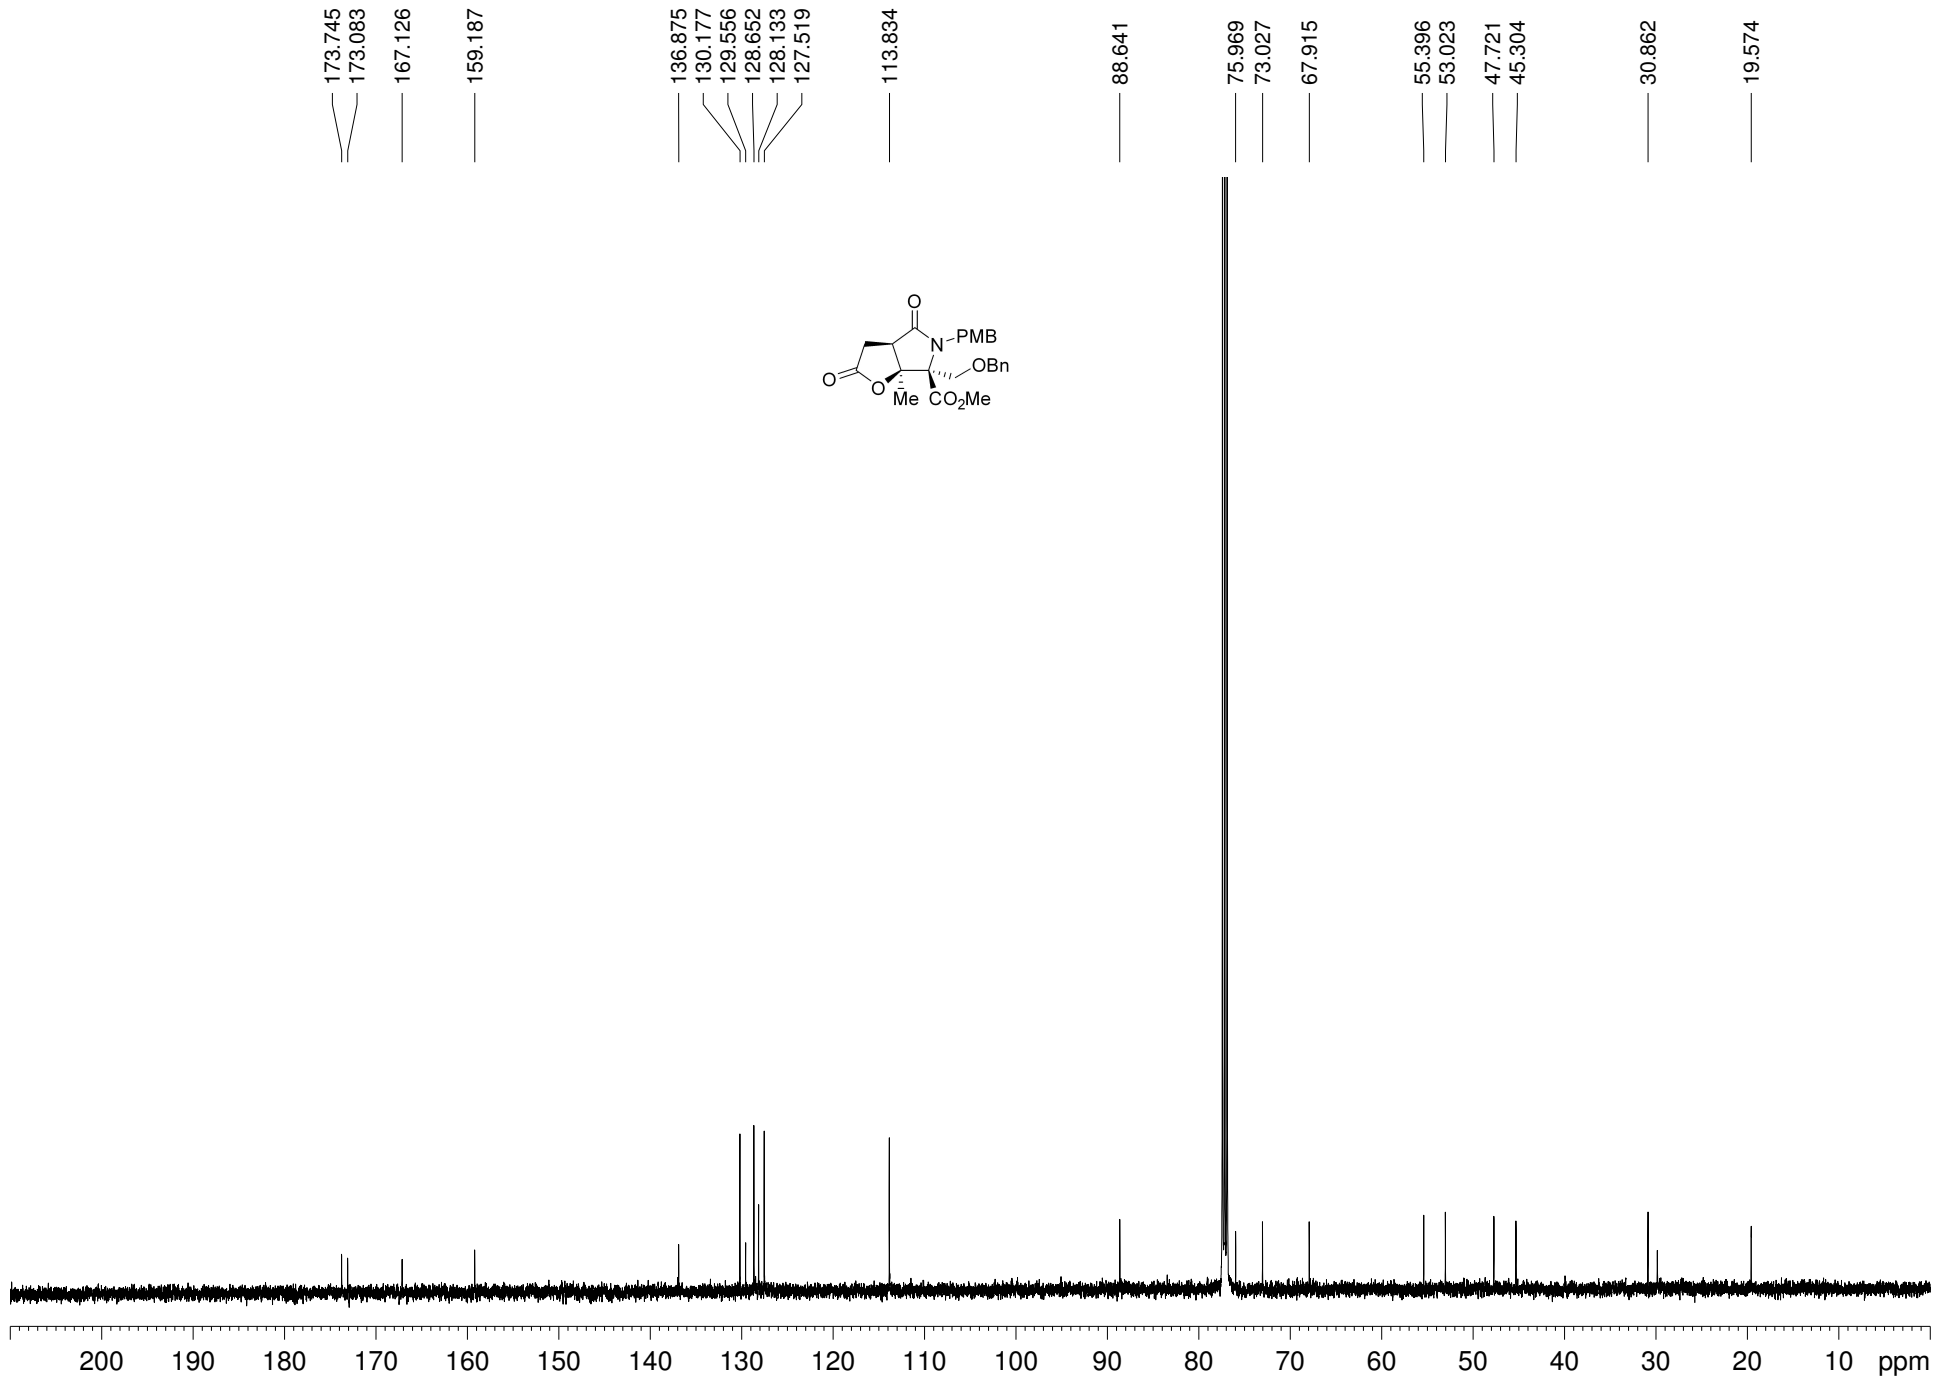

7.356  
7.343  
7.330  
7.315  
7.304  
7.290  
7.213  
7.199  
7.094  
7.077  
6.784  
6.766

4.685  
4.655  
4.384  
4.354  
4.315  
4.292  
4.259  
4.236  
3.904  
3.884  
3.780  
3.723  
3.703  
3.631  
3.036  
3.024  
3.020  
2.991  
2.988  
2.873  
2.853  
2.836  
2.816

1.474

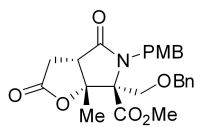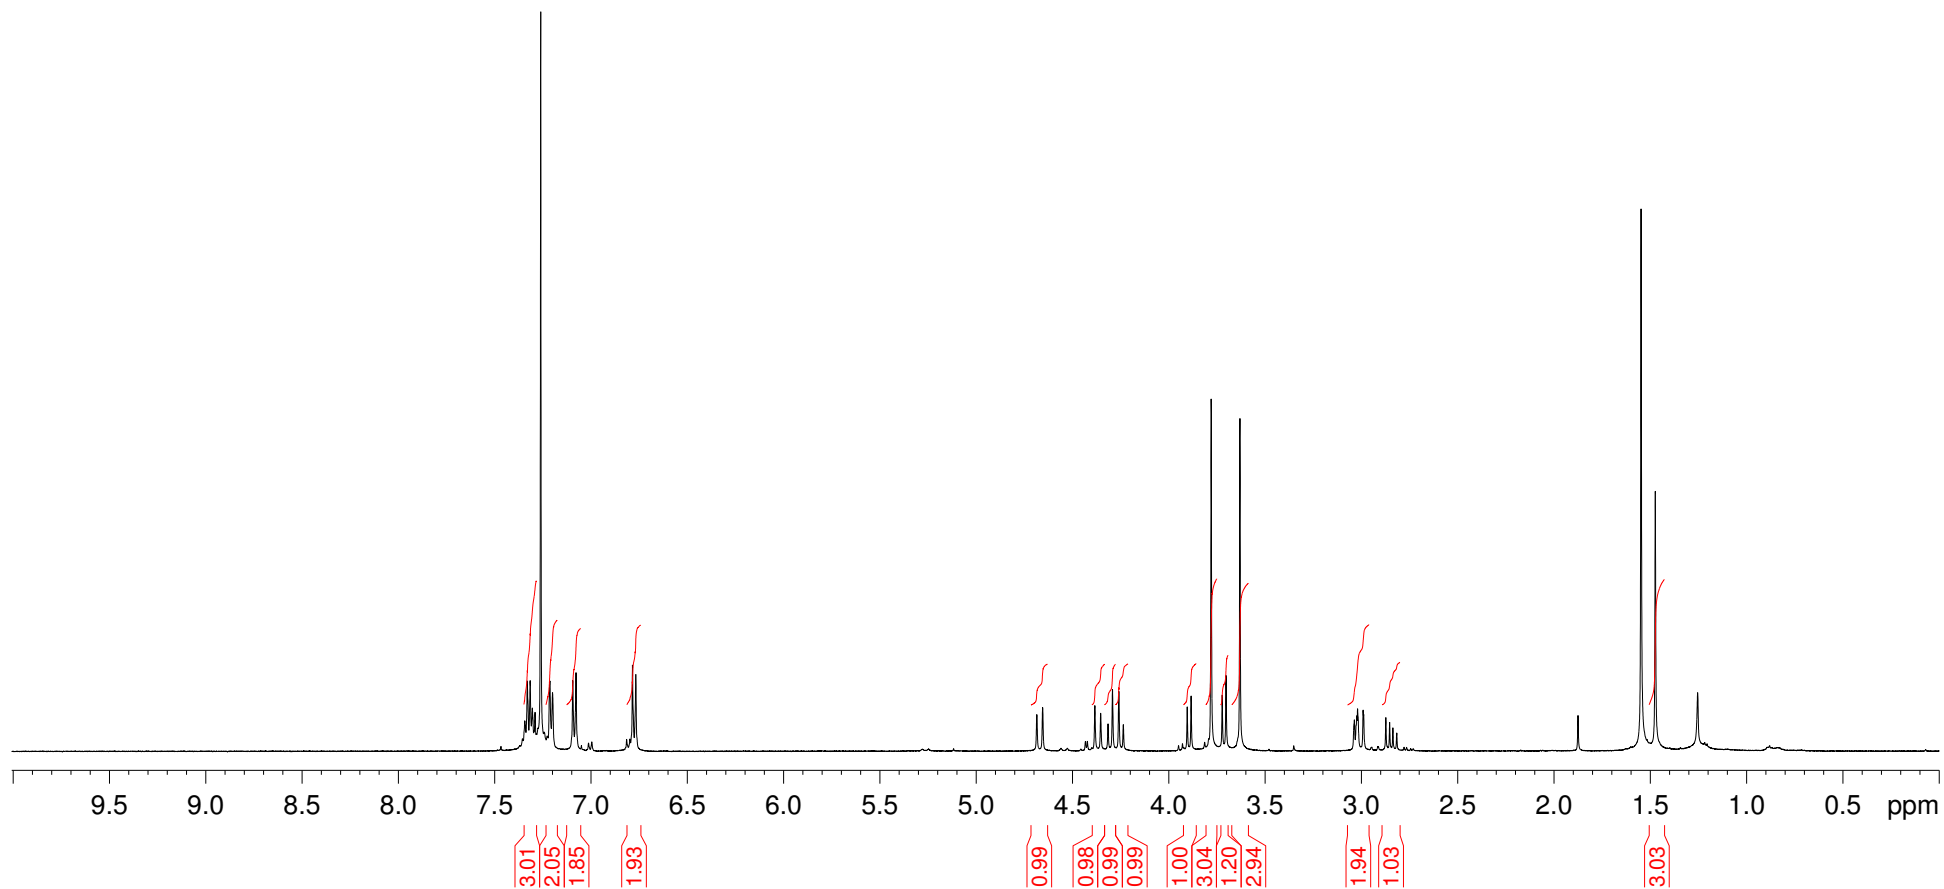

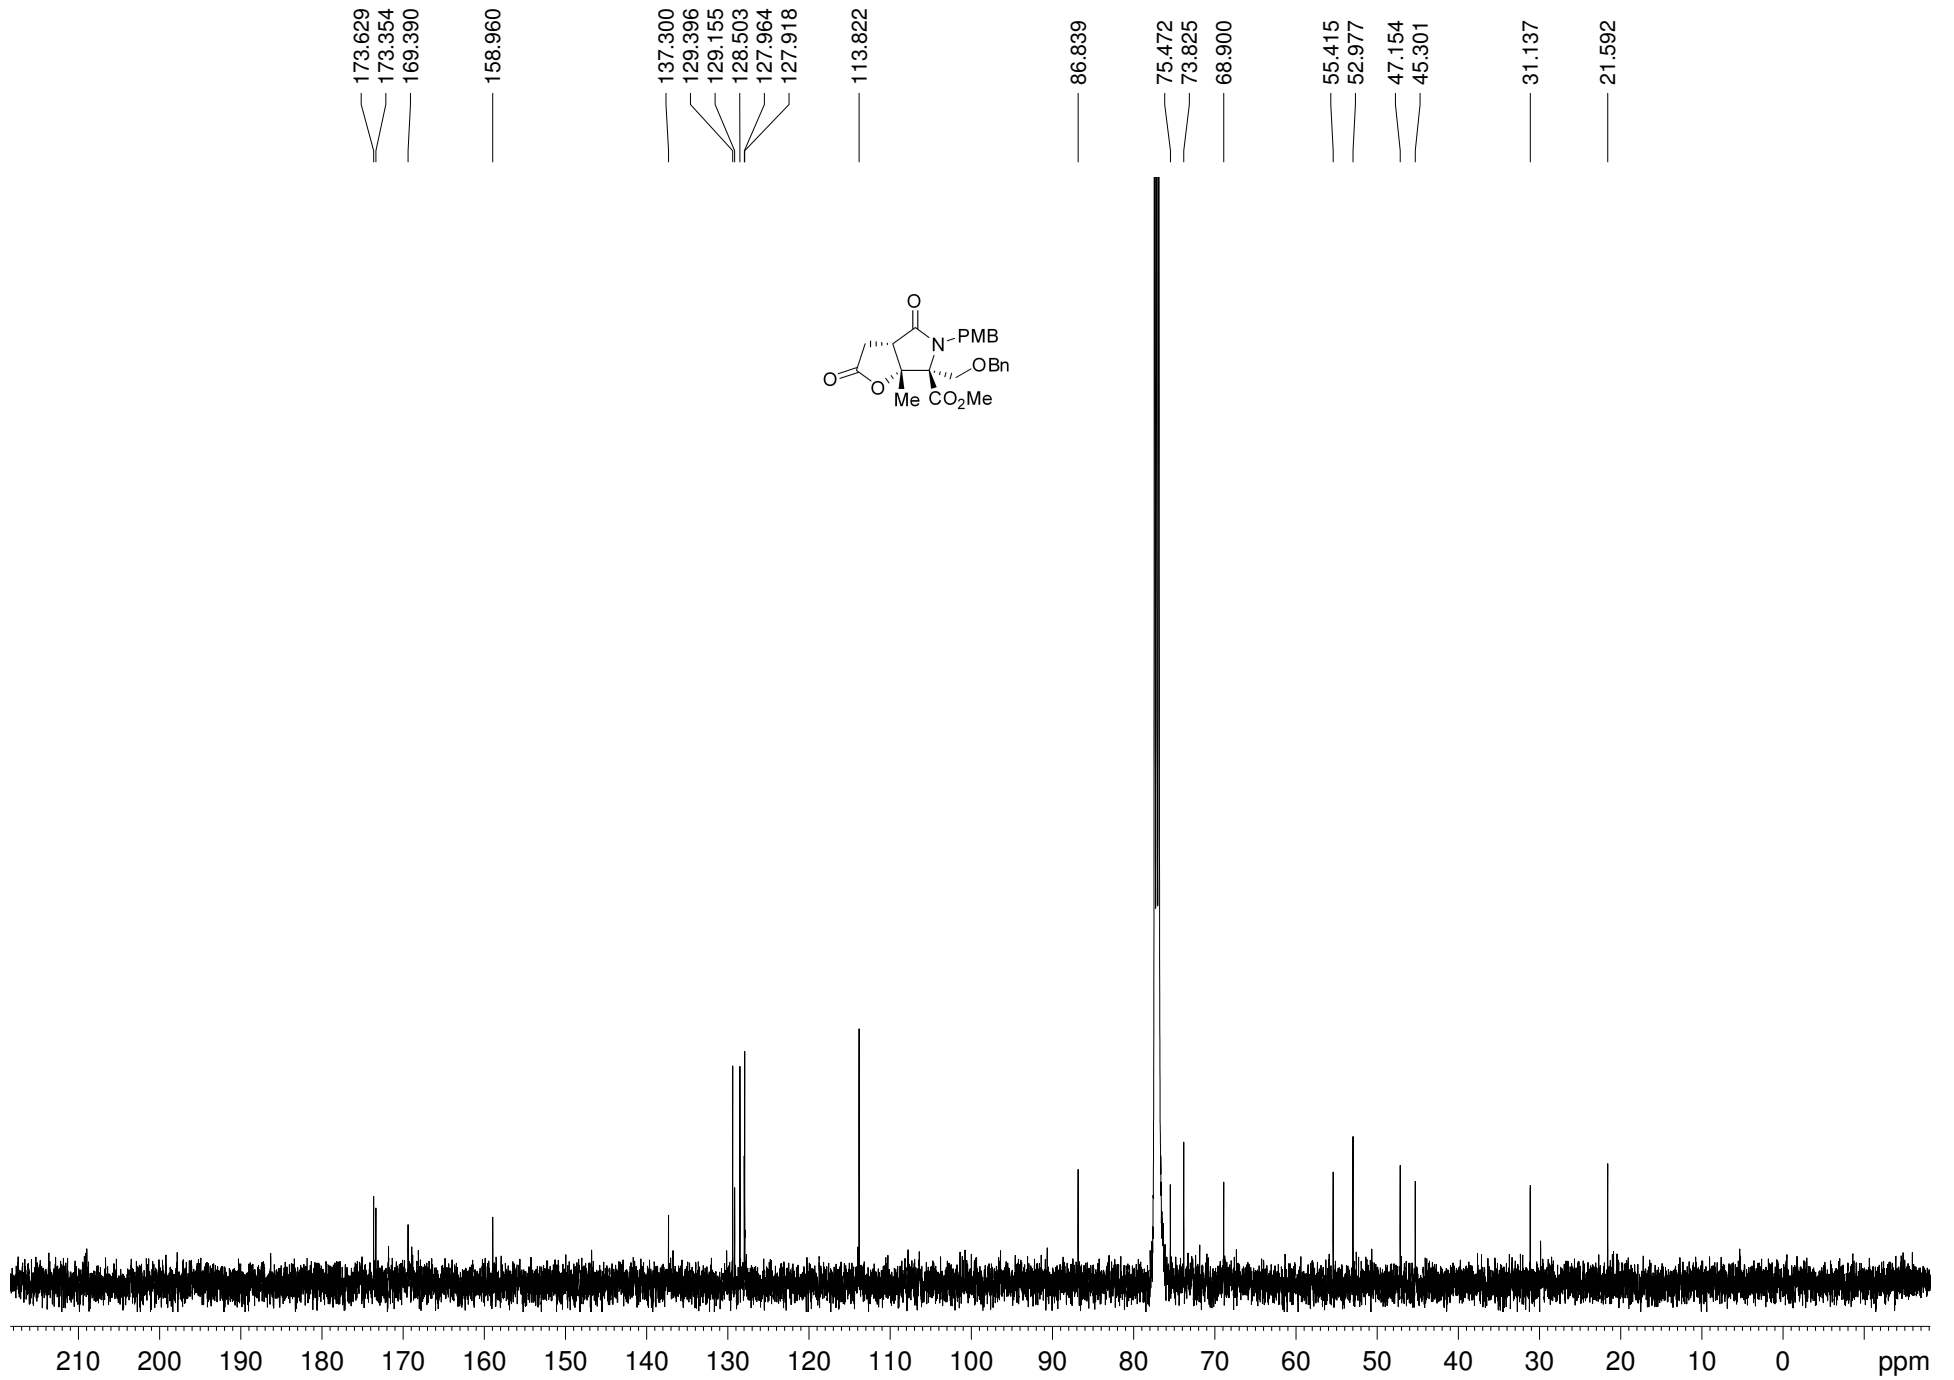

Supplement: NIHMS123358-supplement-01.pdf [file NIHMS123358-supplement-01.pdf]
